# Supplementary material for: Synthesis of α-alkenylated nitriles via electrochemical generation of ketyl radicals
Source: Royal Society of Chemistry journal article supplement (doi:10.1039/d5ob01801c), 2026-01-01

# Supporting Information

## Synthesis of $\alpha$ -alkenylated nitriles via an electrochemical generation of ketyl radicals

Kai Li<sup>a</sup>, Hao Yang<sup>a</sup>, Yupu Zhang<sup>a</sup>, Qi Sun<sup>\*b</sup>, Zhi-Yong Wang<sup>\*a, b</sup>

<sup>\*a</sup> Hefei National Center for Physical Sciences at Microscale, Key Laboratory of Precision and Intelligent Chemistry, School of Chemistry and Materials Science, University of Science and Technology of China, Hefei 230026, China.

\*E-mail: [zwang3@ustc.edu.cn](mailto:zwang3@ustc.edu.cn)

<sup>\*b</sup> Institute of Advanced Technology, University of Science and Technology of China, Hefei 230000, China.

\*Email: [sunqi924@ustc.edu.cn](mailto:sunqi924@ustc.edu.cn)

### Table of Contents

|                                       |     |
|---------------------------------------|-----|
| General Information.....              | S2  |
| Experimental Procedure.....           | S3  |
| Crystal Data of <b>3ha</b> .....      | S3  |
| Mechanistic Studies .....             | S4  |
| Detail Descriptions for Products..... | S14 |
| Reference .....                       | S22 |
| Copies of NMR spectra.....            | S23 |

## General Information

Unless otherwise noted, materials were obtained from commercial suppliers and used without further purification. NMR spectra were recorded on a Bruker AV-500 ( $^1\text{H}$ : 500 MHz,  $^{13}\text{C}$ : 125 MHz,  $^{19}\text{F}$  NMR: 470 MHz) spectrometer using TMS as internal reference. Chemical shifts ( $\delta$ ) and coupling constants (J) were expressed in ppm and Hz, respectively. GC-MS was Shimadzu QP-5050 GC-MS system. Commercially available compounds were used without further purification. All substances were known available compounds. High resolution mass spectra (HRMS) were measured using electrospray ionization (ESI) and the time-of-flight (TOF) mass analyzer. The instrument for electrolysis is dual display potentiostat (CJS-292) (made in China). The electrodes are commercially available from GaossUnion, China. Single crystals of  $\text{C}_{15}\text{H}_{10}\text{BrN}$ : A suitable crystal was selected and on a Bruker D8 VENTURE diffractometer. The crystal was kept at 170.00 K during data collection. Using Olex2, the structure was solved with the SHELXT structure solution program using Intrinsic Phasing and refined with the SHELXL refinement package using Least Squares minimisation.

## Experimental Procedure

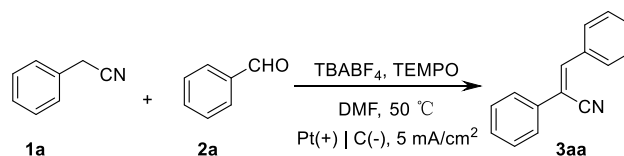

Scheme S1. Experimental procedure for 3aa.

**Typical synthesis steps of (Z)-2,3-diphenylacrylonitrile (3aa):** A mixture of phenylacetonitrile (0.54 mmol), benzaldehyde (0.3 mmol), TBABF<sub>4</sub> (0.3 mmol), TEMPO (0.3 mmol) and DMF = 5 mL were added to an undivided electrolytic cell. The electrolytic cell was equipped with a platinum electrode as anode and a carbon electrode as cathode. The reaction mixture was stirred and electrolyzed at a constant current density of 5 mA/cm<sup>2</sup> under 50 °C for corresponding time. When the reaction was finished, the solution was extracted with EtOAc (3 × 10 mL). The combined organic layer was dried with Na<sub>2</sub>SO<sub>4</sub>, filtered. The solvent was removed with a rotary evaporator. The residue was purified by column chromatography on silica gel (PE/EtOAc = 50:1) to afford the desired product.

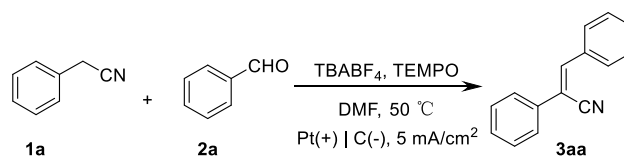

Scheme S2. Experimental procedure of gram scale for 3aa.

**Gram-scale synthesis of (Z)-2,3-diphenylacrylonitrile (3aa):** A mixture of phenylacetonitrile (9 mmol), benzaldehyde (5 mmol), TBABF<sub>4</sub> (5 mmol), TEMPO (3 mmol) and DMF = 85 mL were added to an undivided electrolytic cell. The electrolytic cell was equipped with a platinum electrode as anode and a carbon electrode as cathode. The reaction mixture was stirred and electrolyzed at a constant current density of 5 mA/cm<sup>2</sup> under 50 °C for corresponding time. When the reaction was finished, the solution was extracted with EtOAc (3 × 100 mL). The combined organic layer was dried with Na<sub>2</sub>SO<sub>4</sub>, filtered. The solvent was removed with a rotary evaporator. The residue was purified by column chromatography on silica gel (PE/EtOAc = 50:1) to afford the desired product.

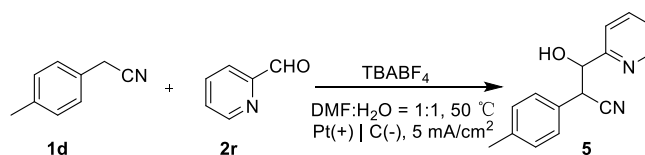

Scheme S3. Experimental procedure for 5.

**Typical synthesis of 3-hydroxy-3-(pyridin-2-yl)-2-(p-tolyl)propanenitrile (5):** A mixture of 4-methylbenzyl cyanide (3.6 mmol), 2-picolinaldehyde (3 mmol), TBABF<sub>4</sub> (3 mmol) and DMF:H<sub>2</sub>O (25 mL:25 mL) were added to an undivided electrolytic cell. The electrolytic cell was equipped with a platinum electrode as anode and a carbon electrode as cathode. The reaction mixture was stirred and electrolyzed at a constant current of 5 mA/cm<sup>2</sup> under 50 °C for corresponding time. When the reaction was finished, the solution was extracted with EtOAc (3 × 50 mL). The combined organic layer was dried with Na<sub>2</sub>SO<sub>4</sub>, filtered. The solvent was removed with a rotary evaporator. The residue was purified by column chromatography on silica gel (PE/EtOAc = 3:1) to afford the desired product.

## Crystal Data of 3ha

Recrystallization solvent: chloroform; Method for crystal growth: the crystal was prepared from the solution of **3ha** in chloroform. Dissolved 20 mg **3ha** with 1 mL of chloroform and volatilized slowly at 25°C for 15 days. (CCDC: 2516622)

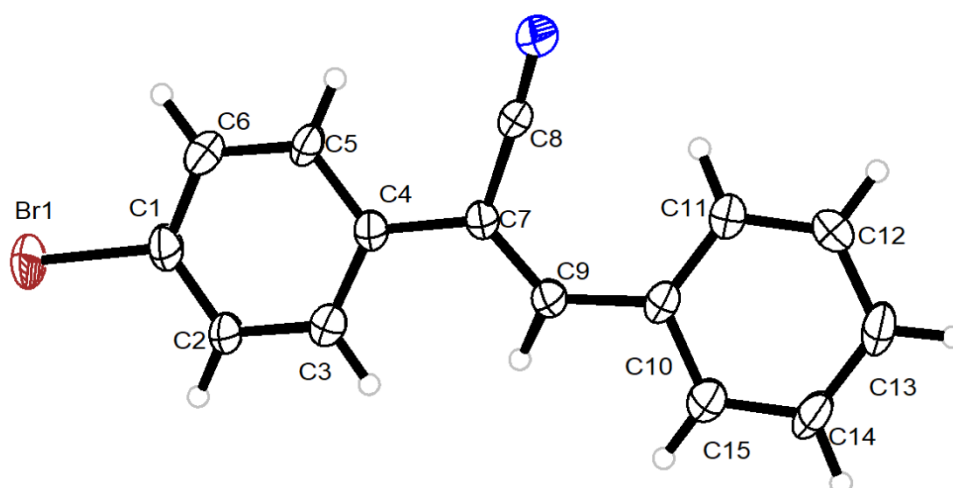

**Figure S1.** Crystal structure for **3ha**.

**Table S1** Crystal data and structure refinement for LK-1214-1.

|                     |                                     |
|---------------------|-------------------------------------|
| Identification code | LK-1214-1                           |
| Empirical formula   | C <sub>15</sub> H <sub>10</sub> BrN |
| Formula weight      | 284.15                              |
| Temperature/K       | 170.00                              |
| Crystal system      | triclinic                           |
| Space group         | P-1                                 |
| a/Å                 | 6.8584(5)                           |
| b/Å                 | 13.9916(9)                          |
| c/Å                 | 14.6230(12)                         |
| $\alpha$ /°         | 116.987(4)                          |
| $\beta$ /°          | 92.240(5)                           |
| $\gamma$ /°         | 101.866(4)                          |

|                                             |                                                                |
|---------------------------------------------|----------------------------------------------------------------|
| Volume/Å <sup>3</sup>                       | 1209.52(16)                                                    |
| Z                                           | 4                                                              |
| $\rho_{\text{calc}}/\text{cm}^3$            | 1.560                                                          |
| $\mu/\text{mm}^{-1}$                        | 4.408                                                          |
| F(000)                                      | 568.0                                                          |
| Crystal size/mm <sup>3</sup>                | 0.12 × 0.11 × 0.1                                              |
| Radiation                                   | CuK $\alpha$ ( $\lambda$ = 1.54178)                            |
| 2 $\Theta$ range for data collection/°      | 6.862 to 137.524                                               |
| Index ranges                                | -8 ≤ h ≤ 8, -16 ≤ k ≤ 15, -17 ≤ l ≤ 17                         |
| Reflections collected                       | 14636                                                          |
| Independent reflections                     | 4341 [ $R_{\text{int}}$ = 0.0659, $R_{\text{sigma}}$ = 0.0743] |
| Data/restraints/parameters                  | 4341/0/307                                                     |
| Goodness-of-fit on F <sup>2</sup>           | 1.065                                                          |
| Final R indexes [ $I \geq 2\sigma(I)$ ]     | $R_1$ = 0.0691, $wR_2$ = 0.1914                                |
| Final R indexes [all data]                  | $R_1$ = 0.0931, $wR_2$ = 0.2052                                |
| Largest diff. peak/hole / e Å <sup>-3</sup> | 1.25/-0.89                                                     |

## Mechanistic Studies

### (1) HRMS for 1.

A mixture of phenylacetonitrile (0.54 mmol), benzaldehyde (0.3 mmol), TBABF<sub>4</sub> (0.3 mmol), TEMPO(0.3mmol) and DMF (5 mL) were added to an undivided electrolytic cell. The electrolytic cell was equipped with a platinum electrode as anode and a carbon electrode as cathode. The reaction mixture was stirred and electrolyzed at a constant current of 5 mA under 50°C for corresponding time.

HRMS (ESI)  $m/z$ : calcd for C<sub>16</sub>H<sub>12</sub>N<sub>2</sub>[M+H]<sup>+</sup> 233.1073, found 233.1077.

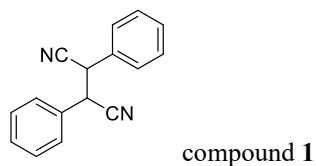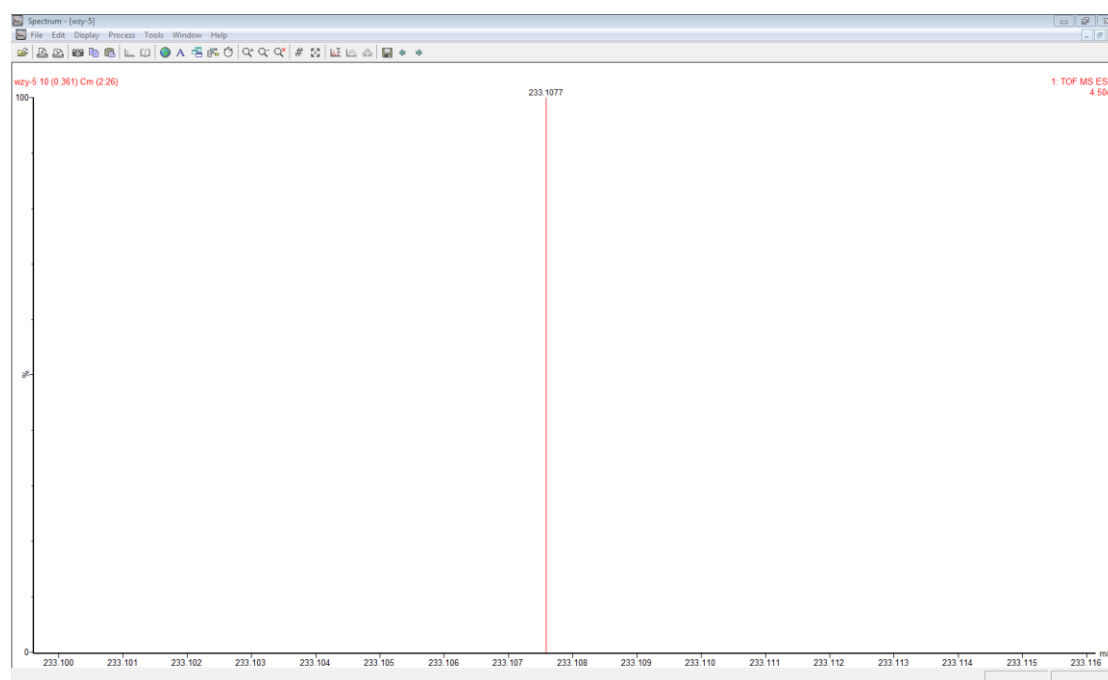

Figure S2. HRMS for 1.

### (2) HRMS for 2.

A mixture of phenylacetonitrile (0.54 mmol), benzaldehyde (0.3 mmol), TBABF<sub>4</sub> (0.3 mmol), TEMPO(0.3mmol) and DMF (5 mL) were added to an undivided electrolytic cell. The electrolytic cell was equipped with a platinum electrode as anode and a carbon electrode as cathode. The reaction mixture was stirred and electrolyzed at a constant current of 5 mA under 50°C for corresponding time.

HRMS (ESI)  $m/z$ : calcd for C<sub>14</sub>H<sub>14</sub>O<sub>2</sub>[M+Na]<sup>+</sup> 237.0886, found 237.0884.

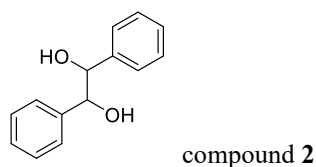

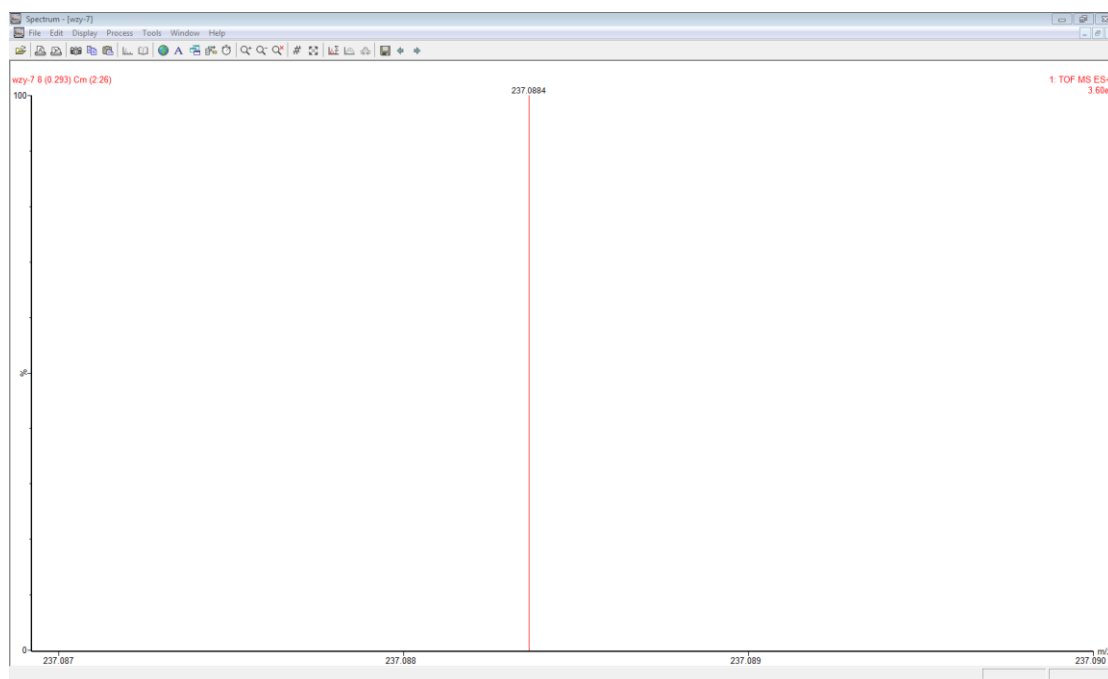

**Figure S3.** HRMS for **2**.

### **(3) HRMS for 3.**

A mixture of phenylacetonitrile (0.54 mmol), benzaldehyde (0.3 mmol), TBABF<sub>4</sub> (0.3 mmol), TEMPO (0.3 mmol) and DMF (5 mL) were added to an undivided electrolytic cell. The electrolytic cell was equipped with a platinum electrode as anode and a carbon electrode as cathode. The reaction mixture was stirred and electrolyzed at a constant current of 5 mA under 50°C for corresponding time.

HRMS (ESI)  $m/z$ : calcd for C<sub>15</sub>H<sub>13</sub>NO[M+Na]<sup>+</sup> 246.0889, found 246.0896.

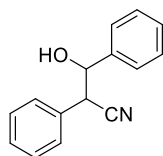

**compound 3**

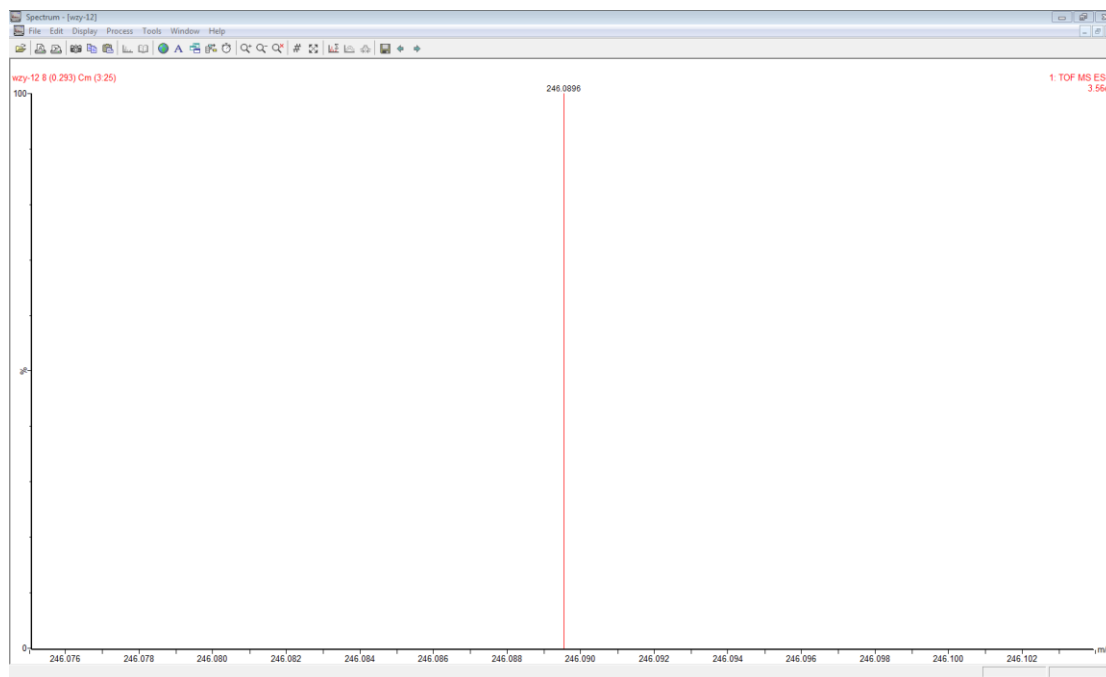

**Figure S4.** HRMS for **3**.

**(4) Deuterium exchange of phenylacetonitrile to give D-incorporation product **4**.**

A mixture of phenylacetonitrile (0.54 mmol), TBABF<sub>4</sub> (0.3 mmol), D<sub>2</sub>O (100 μL), TEMPO (0.3 mmol) and DMF (5 mL) were added to an undivided electrolytic cell. The electrolytic cell was equipped with a platinum electrode as anode and a carbon electrode as cathode. The reaction mixture was stirred and electrolyzed at a constant current of 5 mA under 50 °C for 3.5 h. **4** was isolated in 96% yield with 190% D-incorporation at  $\alpha$ -position of cyano group as revealed by <sup>1</sup>H NMR.

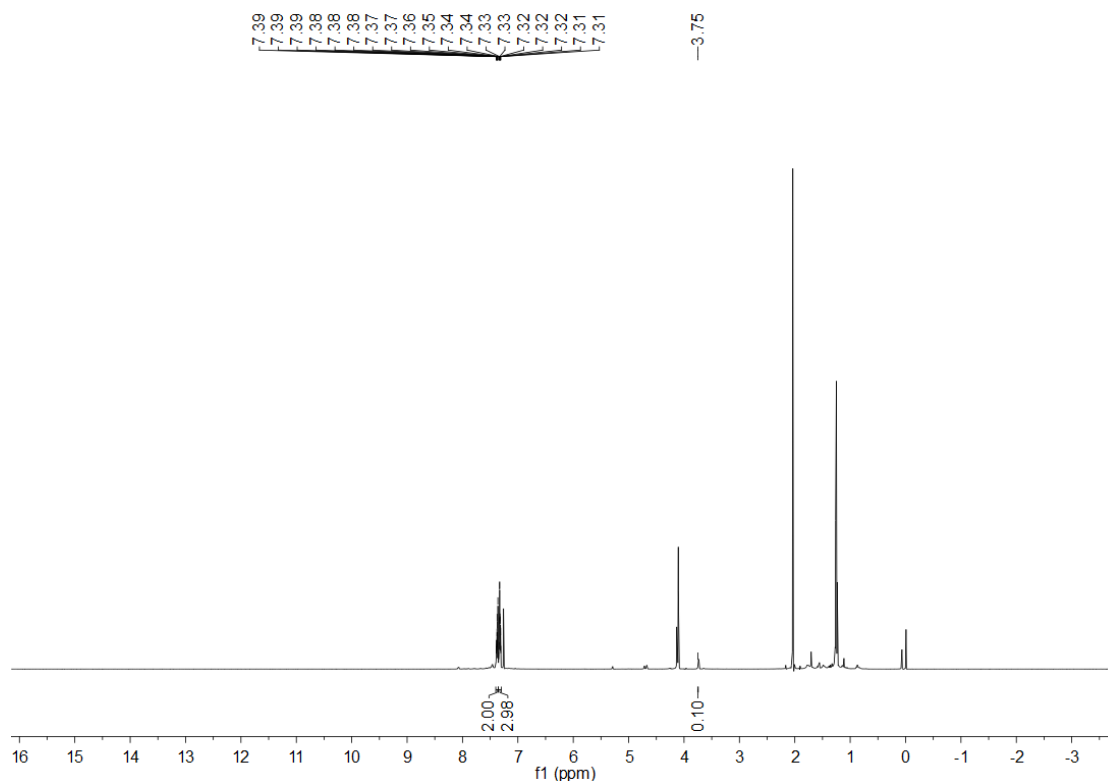



**Figure S5.**  $^1\text{H}$  NMR of **4** for Scheme 5a (standard conditions).

A mixture of phenylacetonitrile (0.54 mmol), TBABF<sub>4</sub> (0.3 mmol), D<sub>2</sub>O (100  $\mu\text{L}$ ), and DMF (5 mL) were added to an undivided electrolytic cell. The electrolytic cell was equipped with a platinum electrode as anode and a carbon electrode as cathode. The reaction mixture was stirred and electrolyzed at a constant current of 5 mA under 50°C for 3.5 h. **4** was isolated in 92% yield with 150% D-incorporation at  $\alpha$ -position of cyano group as revealed by  $^1\text{H}$  NMR.

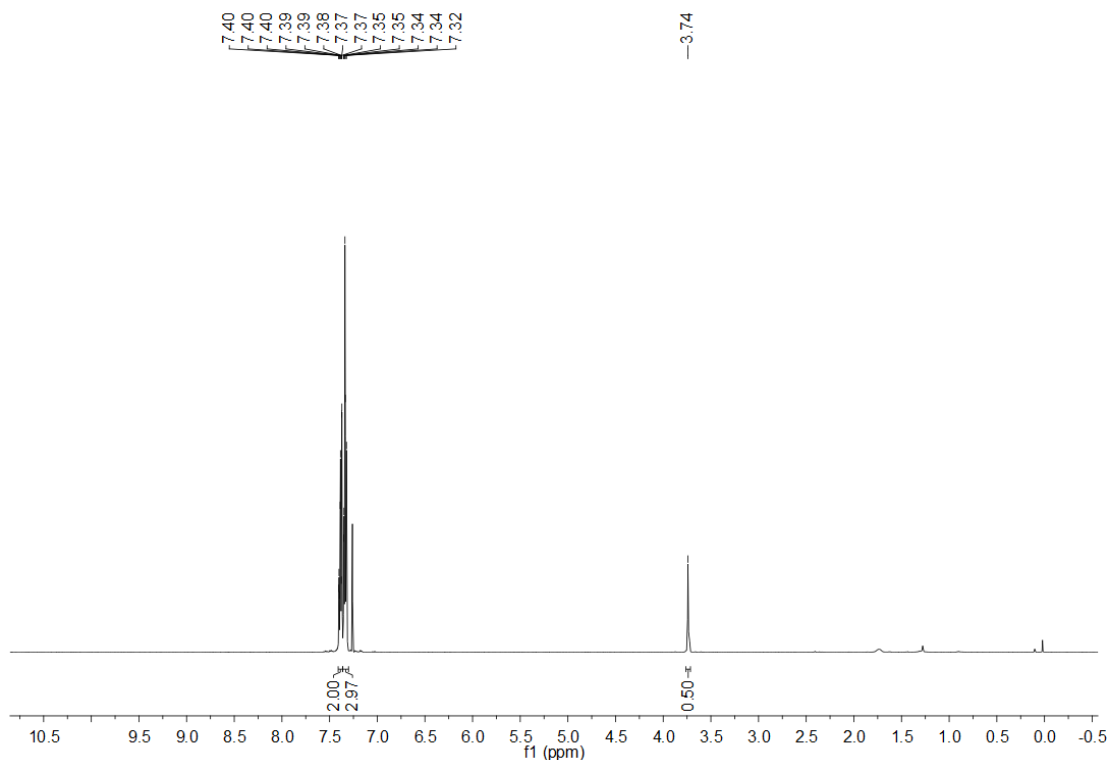

**Figure S6.**  $^1\text{H}$  NMR of **4** for Scheme 5a (without TEMPO).

#### (5) HRMS for **7**.

A mixture of phenylacetonitrile (0.54 mmol), benzaldehyde (0.3 mmol), TBABF<sub>4</sub> (0.3 mmol), TEMPO (0.3 mmol) and DMF (5 mL) were added to an undivided electrolytic cell. The electrolytic cell was equipped with a platinum electrode as anode and a carbon electrode as cathode. The reaction mixture was stirred and electrolyzed at a constant current of 5 mA under 50°C for corresponding time.

HRMS (ESI)  $m/z$ : calcd for C<sub>15</sub>H<sub>13</sub>NO[M+Na]<sup>+</sup> 467.1730, found 467.1727.

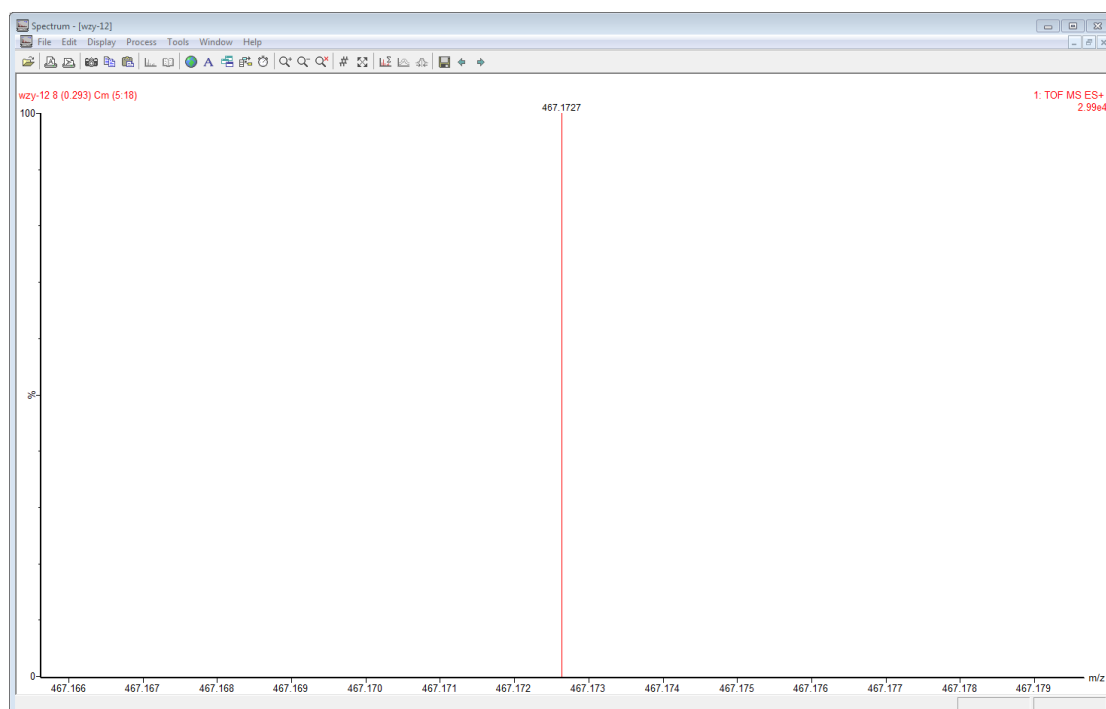

**Figure S7.** HRMS of **7**.

**(6) Deuterium exchange of 2-phenylpropanenitrile to give D-incorporation product **9**.**

A mixture of 2-phenylpropanenitrile (0.54 mmol), TBABF<sub>4</sub> (0.3 mmol), D<sub>2</sub>O (100 μL), TEMPO (0.3 mmol) and DMF (5 mL) were added to an undivided electrolytic cell. The electrolytic cell was equipped with a platinum electrode as anode and a carbon electrode as cathode. The reaction mixture was stirred and electrolyzed at a constant current of 5 mA under 50 °C for 3.5 h. **2** was isolated in 90% yield with 75% D-incorporation at α position of cyano group as revealed by <sup>1</sup>H NMR.

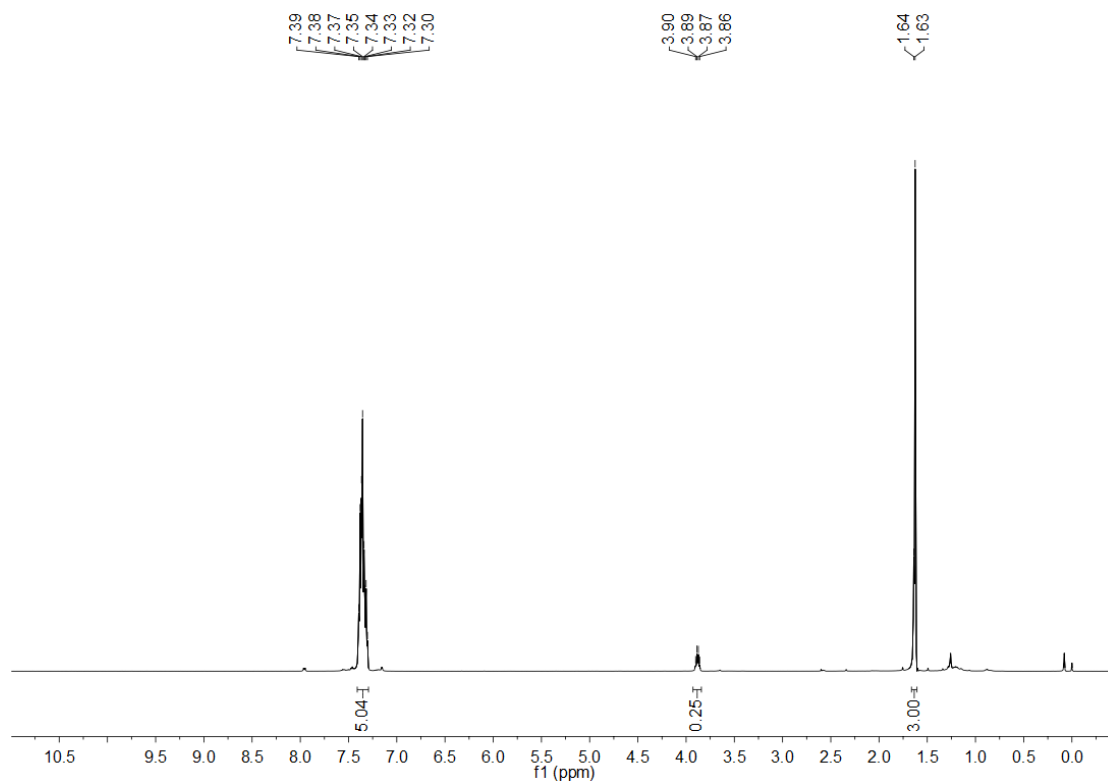

**Figure S8.**  $^1\text{H}$  NMR of **9**.

**(7) HRMS for II.**

A mixture of phenylacetonitrile (0.54 mmol), benzaldehyde (0.3 mmol), TBABF<sub>4</sub> (0.3 mmol), TEMPO (0.3 mmol) and DMF (5 mL) were added to an undivided electrolytic cell. The electrolytic cell was equipped with a platinum electrode as anode and a carbon electrode as cathode. The reaction mixture was stirred and electrolyzed at a constant current of 5 mA under 50°C for corresponding time.

HRMS (ESI)  $m/z$ : calcd for C<sub>9</sub>H<sub>19</sub>NO[M+H]<sup>+</sup> 158.1539, found 158.1547.

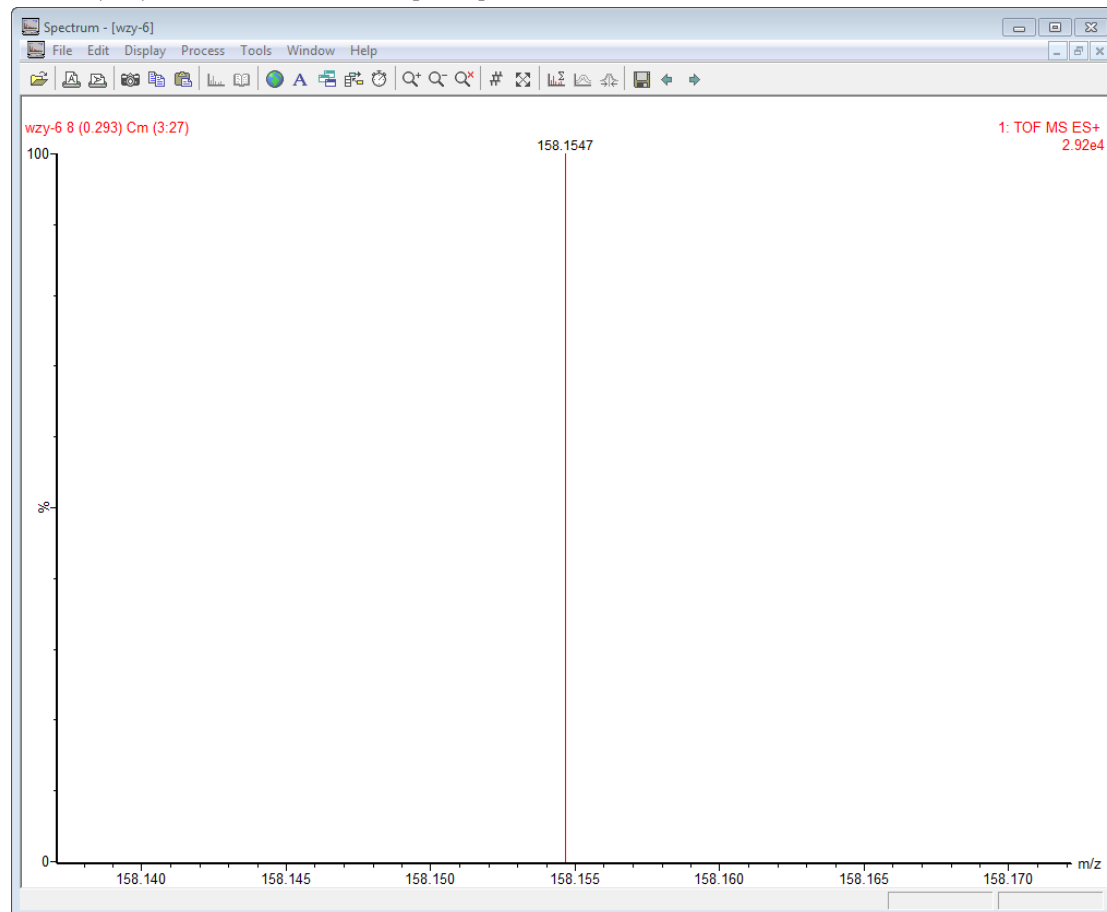

**Figure S9.** HRMS for **II**.

**(8) Cyclic voltammetry experiments.**

To gain insight into the reaction mechanism, we conducted a series of cyclic voltammograms. First, the electrochemical properties of reaction components were investigated (Figure S9), while the oxidation peaks from TEMPO (1.02V) [vs Ag/AgCl] and **1a** (1.40V) were found. These results indicate that TEMPO are first oxidized on the anode surface. Then, we treated **1a** with equal amounts of TEMPO, and found that the oxidation peak of TEMPO did not generate any significant catalytic current, indicating that TEMPO has no obvious catalytic effect on **1a**.

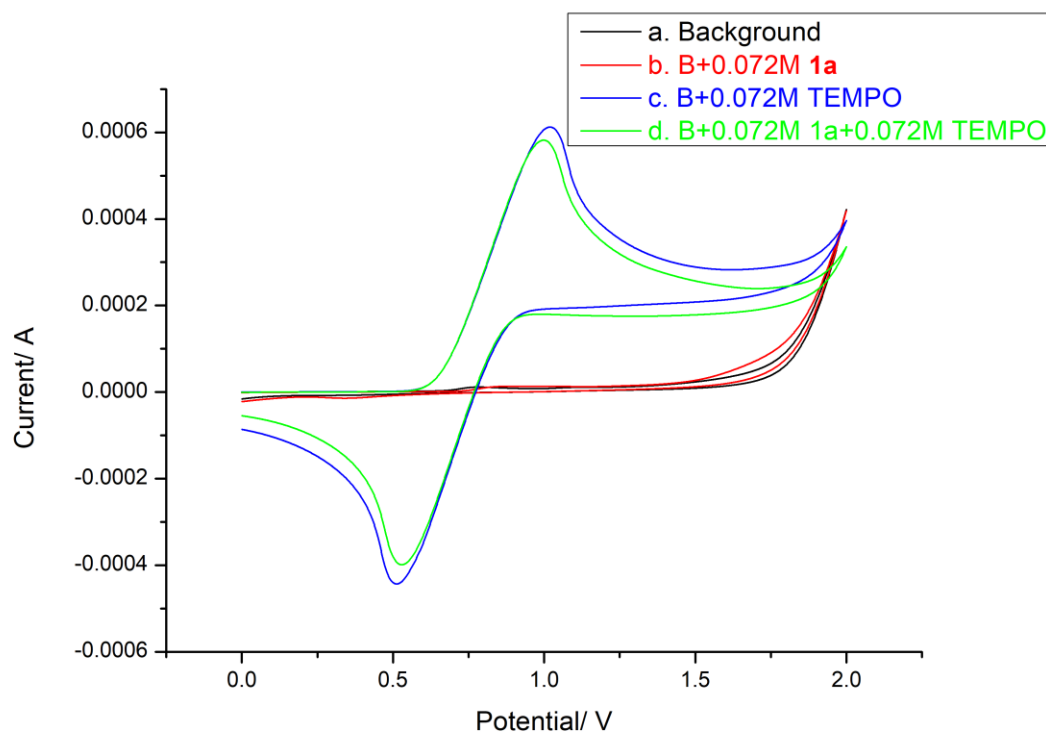

**Figure S10.** Cyclic voltammetry of **1a** and TEMPO in 0.1 M TBABF<sub>4</sub>/DMF (10 mL) at room temperature using a Pt disk as the working electrode and Pt wire and Ag/AgCl as the counter and reference electrodes with a scan rate at 100 mV/s. background (curve a), **1a** (0.072M) (curve b), TEMPO (0.072M) (curve c) and **1a** (0.072M) TEMPO (0.072M) (curve d).

Additionally, the electrochemical properties of TEMPO and **2a** were investigated (Figure S11). Cyclic voltammetry curves show that TEMPO has an obvious catalytic effect on **2a** (curve b vs curve d, curve c vs curve d). These results indicate that TEMPO would facilitate the reduction of **2a** on the cathode surface.

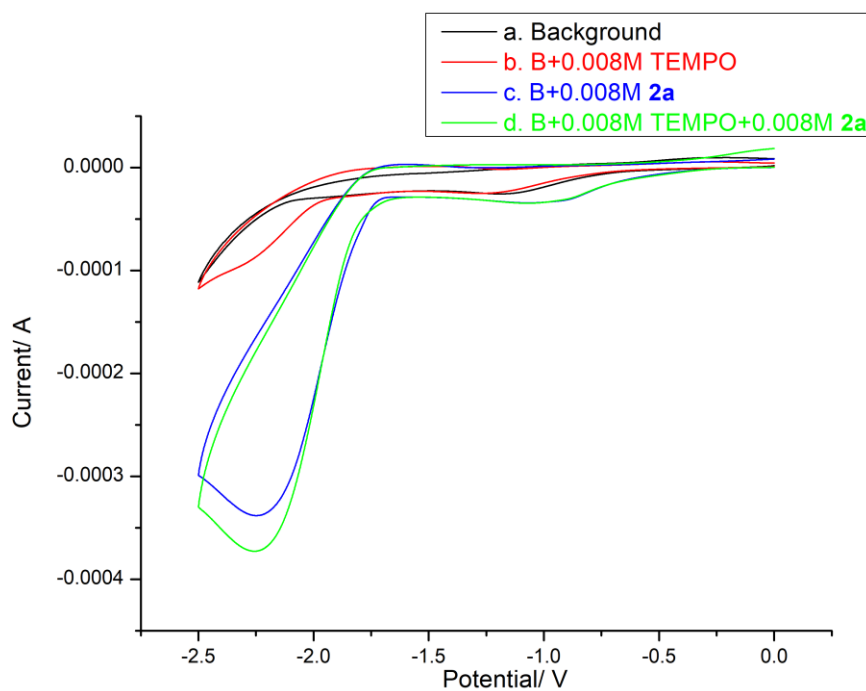

**Figure S11.** Cyclic voltammetry of **2a** and TEMPO in 0.1 M TBABF<sub>4</sub>/DMF (10 mL) at room temperature using a Pt disk as the working electrode and Pt wire and Ag/AgCl as the counter and reference electrodes with a scan rate at 100 mV/s. background (curve a), TEMPO (0.008M) (curve b), **2a** (0.008M) (curve c), and **2a** (0.008M) TEMPO (0.008M) (curve d).

Finally, the electrochemical properties of **1a** were investigated (Figure S12), while the oxidation peaks of **1a** (1.35V) [vs Ag/AgCl]) was found.

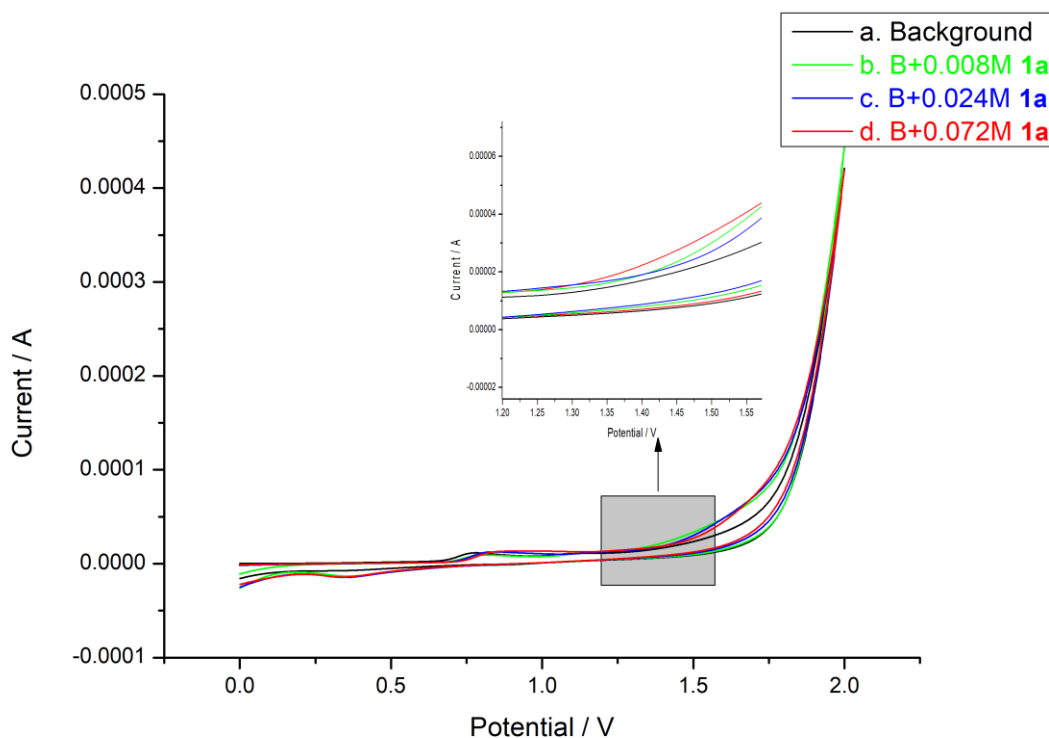

**Figure S12.** Cyclic voltammetry of **1a** in 0.1 M TBABF<sub>4</sub>/DMF (10 mL) at room temperature using a Pt disk as the working electrode and Pt wire and Ag/AgCl as the counter and reference electrodes with a scan rate at 100 mV/s. background (curve a), **1a** (0.008M) (curve b), **1a** (0.024M) (curve c) and **1a** (0.072M) (curve d).

## Detail Descriptions for Products

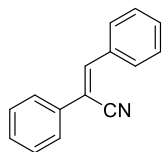

**(Z)-2,3-diphenylacrylonitrile (3aa)** <sup>[S1]</sup> was prepared according to the general working procedure and purified by column chromatography (petroleum ether/ethyl acetate = 50:1) to give the product as a white solid. 95% yield, 58.4mg. <sup>1</sup>H NMR (500 MHz, CDCl<sub>3</sub>) δ 7.91 (d, *J* = 7.4 Hz, 2H), 7.70 (d, *J* = 7.7 Hz, 2H), 7.55 (s, 1H), 7.50 – 7.39 (m, 6H). <sup>13</sup>C NMR (125 MHz, CDCl<sub>3</sub>) δ 142.3, 134.5, 133.8, 130.6, 129.3, 129.2, 129.1, 129.0, 126.0, 118.0, 111.7.

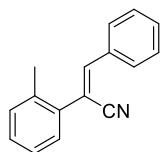

**(Z)-3-phenyl-2-(o-tolyl)acrylonitrile (3ba)** <sup>[S1]</sup> was prepared according to the general working procedure and purified by column chromatography (petroleum ether/ethyl acetate = 50:1) to give the product as a white solid. 45% yield, 29.5mg. <sup>1</sup>H NMR (500 MHz, CDCl<sub>3</sub>) δ 7.92 – 7.85 (m, 2H), 7.49 – 7.44 (m, 3H), 7.33 – 7.25 (m, 4H), 7.15 (s, 1H), 2.49 (s, 3H). <sup>13</sup>C NMR (125 MHz, CDCl<sub>3</sub>) δ 147.0, 136.4, 135.6, 133.7, 131.0, 130.8, 129.5, 129.3, 129.2, 129.1, 126.6, 118.0, 111.3, 20.3.

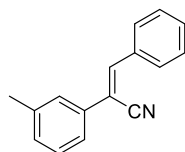

**(Z)-3-phenyl-2-(m-tolyl)acrylonitrile (3ca)** <sup>[S7]</sup> was prepared according to the general working procedure and purified by column chromatography (petroleum ether/ethyl acetate = 50:1) to give the product as a white solid. 86% yield, 56.6mg. <sup>1</sup>H NMR (500 MHz, CDCl<sub>3</sub>) δ 7.94 – 7.90 (m, 2H), 7.54 (s, 1H), 7.52 – 7.45 (m, 5H), 7.35 (t, *J* = 7.6 Hz, 1H), 7.23 (d, *J* = 7.5 Hz, 1H), 2.44 (s, 3H). <sup>13</sup>C NMR (125 MHz, CDCl<sub>3</sub>) δ 142.0, 138.8, 134.3, 133.8, 130.5, 130.0, 129.3, 129.0, 128.9, 126.7, 123.1, 118.1, 111.6, 21.5.

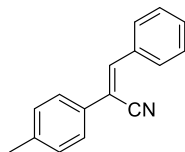

**(Z)-3-phenyl-2-(p-tolyl)acrylonitrile (3da)** <sup>[S1]</sup> was prepared according to the general working procedure and purified by column chromatography (petroleum ether/ethyl acetate = 50:1) to give the product as a white solid. 94% yield, 61.7mg. <sup>1</sup>H NMR (500 MHz, CDCl<sub>3</sub>) δ 7.86 – 7.82 (m, 2H), 7.55 – 7.51 (m, 2H), 7.44 (s, 1H), 7.43 – 7.37 (m, 3H), 7.21 – 7.19 (m, 2H), 2.35 (s, 3H). <sup>13</sup>C NMR (125 MHz, CDCl<sub>3</sub>) δ 141.2, 139.4, 133.8, 131.6, 130.3, 129.8, 129.2, 128.9, 125.8, 118.1, 111.5, 21.2.

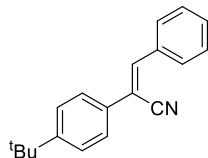

**(Z)-2-(4-(*tert*-butyl)phenyl)-3-phenylacrylonitrile (3ea)** <sup>[S7]</sup> was prepared according to the general working procedure and purified by column chromatography (petroleum ether/ethyl acetate = 50:1) to give the product as a white solid. 81% yield, 60.2mg. <sup>1</sup>H NMR (500 MHz, CDCl<sub>3</sub>) δ 7.77 – 7.72 (m, 2H), 7.50 – 7.46 (m, 2H), 7.36 (s, 1H), 7.33 – 7.26 (m, 5H), 1.21 (s, 9H). <sup>13</sup>C NMR (125 MHz, CDCl<sub>3</sub>) δ 152.6, 141.3, 133.8, 131.6, 130.4, 129.2, 128.9, 126.0, 125.7, 118.1, 111.4, 34.7, 31.2.

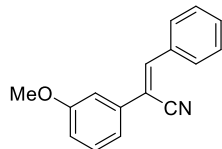

**(Z)-2-(3-methoxyphenyl)-3-phenylacrylonitrile (3fa)** <sup>[S8]</sup> was prepared according to the general working procedure and purified by column chromatography (petroleum ether/ethyl acetate = 50:1) to give the product as a white solid. 84% yield, 59.1mg. <sup>1</sup>H NMR (500 MHz, CDCl<sub>3</sub>) δ 7.89 – 7.84 (m, 2H), 7.51 (s, 1H), 7.46 – 7.41 (m, 3H), 7.33 (t, *J* = 8.0 Hz, 1H), 7.26 – 7.23 (m, 1H), 7.18 – 7.17 (m, 1H), 6.94 – 6.90 (m, 1H), 3.83 (s, 3H). <sup>13</sup>C NMR (125 MHz, CDCl<sub>3</sub>) δ 160.1, 142.5, 135.9, 133.7, 130.6, 130.1, 129.4, 129.0, 118.4, 118.0, 114.8, 111.7, 111.5, 55.4.

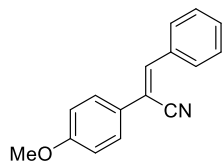

**(Z)-2-(4-methoxyphenyl)-3-phenylacrylonitrile (3ga)** <sup>[S1]</sup> was prepared according to the general working procedure and purified by column chromatography (petroleum ether/ethyl acetate = 50:1) to give the product as a white solid. 88% yield, 62.1mg. <sup>1</sup>H NMR (500 MHz, CDCl<sub>3</sub>) δ 7.83 – 7.81 (m, 2H), 7.58 – 7.55 (m, 2H), 7.43 – 7.37 (m, 3H), 7.37 (s, 1H), 6.93 – 6.89 (m, 2H), 3.78 (s, 3H). <sup>13</sup>C NMR (125 MHz, CDCl<sub>3</sub>) δ 160.4, 140.0, 133.9, 130.1, 129.0, 128.8, 127.2, 126.8, 118.1, 114.4, 111.1, 55.3.

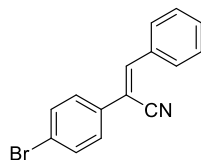

**(Z)-2-(4-bromophenyl)-3-phenylacrylonitrile (3ha)** <sup>[S7]</sup> was prepared according to the general working procedure and purified by column chromatography (petroleum ether/ethyl acetate = 50:1) to give the product as a white solid. 69% yield, 58.6mg. <sup>1</sup>H NMR (500 MHz, CDCl<sub>3</sub>) δ 7.91 – 7.87 (m, 2H), 7.59 – 7.52 (m, 5H), 7.49 – 7.45 (m, 3H). <sup>13</sup>C NMR (125 MHz, CDCl<sub>3</sub>) δ 142.7, 133.6, 133.5, 132.4, 131.0, 129.5, 129.2, 127.6, 123.6, 117.7, 110.7.

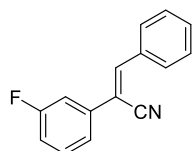

**(Z)-2-(3-fluorophenyl)-3-phenylacrylonitrile (3ia)** <sup>[S12]</sup> was prepared according to the general working procedure and purified by column chromatography (petroleum ether/ethyl acetate = 50:1) to give the product as a white solid. 81% yield, 54.2mg. <sup>1</sup>H NMR (500 MHz, CDCl<sub>3</sub>) δ 7.93 – 7.88 (m, 2H), 7.54 (s, 1H), 7.50 – 7.45 (m, 4H), 7.44 – 7.40 (m, 1H), 7.40 – 7.36 (m, 1H), 7.12–7.08 (m, 1H). <sup>13</sup>C NMR (125 MHz, CDCl<sub>3</sub>) δ 163.2 (d, *J* = 247.2 Hz), 143.3, 136.7 (d, *J* = 8.0 Hz), 133.4, 131.0, 130.8 (d, *J* = 8.5 Hz), 129.5, 129.1, 121.9 (d, *J* = 2.8 Hz), 117.7, 116.2 (d, *J* = 21.3 Hz), 113.0 (d, *J* = 23.5 Hz), 110.5

(d,  $J = 2.7$  Hz).  $^{19}\text{F}$  NMR (470 MHz,  $\text{CDCl}_3$ )  $\delta$  -111.7.

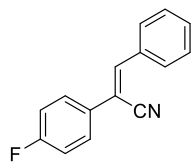

**(Z)-2-(4-fluorophenyl)-3-phenylacrylonitrile (3ja)** <sup>[S1]</sup> was prepared according to the general working procedure and purified by column chromatography (petroleum ether/ethyl acetate = 50:1) to give the product as a white solid. 96% yield, 64.1mg.  $^1\text{H}$  NMR (500 MHz,  $\text{CDCl}_3$ )  $\delta$  7.87 – 7.83 (m, 2H), 7.65 – 7.60 (m, 2H), 7.46 – 7.40 (m, 4H), 7.13 – 7.08 (m, 2H).  $^{13}\text{C}$  NMR (126 MHz,  $\text{CDCl}_3$ )  $\delta$  163.2 (d,  $J = 250.3$  Hz), 142.2 (d,  $J = 1.6$  Hz), 133.6, 130.7, 130.6, 129.3, 129.0, 127.9 (d,  $J = 8.3$  Hz), 117.9, 116.2 (d,  $J = 22.0$  Hz), 110.5.  $^{19}\text{F}$  NMR (470 MHz,  $\text{CDCl}_3$ )  $\delta$  -111.5.

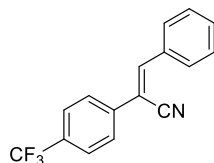

**(Z)-3-phenyl-2-(4-(trifluoromethyl)phenyl)acrylonitrile (3ka)** <sup>[S1]</sup> was prepared according to the general working procedure and purified by column chromatography (petroleum ether/ethyl acetate = 50:1) to give the product as a white solid. 53% yield, 43.3mg.  $^1\text{H}$  NMR (500 MHz,  $\text{CDCl}_3$ )  $\delta$  7.95 – 7.90 (m, 2H), 7.81 – 7.77 (m, 2H), 7.72 – 7.68 (m, 2H), 7.62 (s, 1H), 7.52 – 7.47 (m, 3H).  $^{13}\text{C}$  NMR (125 MHz,  $\text{CDCl}_3$ )  $\delta$  144.2, 137.9, 133.2, 131.3, 131.0 (q,  $J = 32.9$  Hz), 129.6, 129.1, 126.3, 126.1 (q,  $J = 3.6$  Hz), 123.8 (q,  $J = 272.3$  Hz), 117.5, 110.3.  $^{19}\text{F}$  NMR (470 MHz,  $\text{CDCl}_3$ )  $\delta$  -62.7.

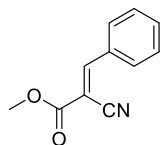

**methyl (Z)-2-cyano-3-phenylacrylate (3la)** <sup>[S11]</sup> was prepared according to the general working procedure and purified by column chromatography (petroleum ether/ethyl acetate = 50:1) to give the product as a white solid. 43% yield, 24.1mg.  $^1\text{H}$  NMR (500 MHz,  $\text{CDCl}_3$ )  $\delta$  8.27 (s, 1H), 8.02 – 7.98 (m, 2H), 7.59 – 7.55 (m, 1H), 7.53 – 7.49 (m, 2H), 3.94 (s, 3H).  $^{13}\text{C}$  NMR (125 MHz,  $\text{CDCl}_3$ )  $\delta$  163.1, 155.4, 133.5, 131.4, 131.2, 129.3, 115.5, 102.5, 53.5.

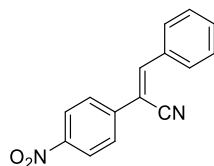

**(Z)-2-(4-nitrophenyl)-3-phenylacrylonitrile (3na)** <sup>[S14]</sup> was prepared according to the general working procedure and purified by column chromatography (petroleum ether/ethyl acetate = 50:1) to give the product as a yellow solid. 25% yield, 18.8mg.  $^1\text{H}$  NMR (500 MHz,  $\text{CDCl}_3$ )  $\delta$  8.33 – 8.30 (m, 2H), 7.96 – 7.93 (m, 2H), 7.87 – 7.84 (m, 2H), 7.69 (s, 1H), 7.54 – 7.50 (m, 3H).  $^{13}\text{C}$  NMR (125 MHz,  $\text{CDCl}_3$ )  $\delta$  148.1, 145.7, 140.7, 133.0, 131.9, 129.9, 129.4, 126.1, 124.5, 117.3, 109.7.



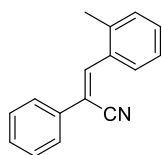

**(Z)-2-phenyl-3-(*o*-tolyl)acrylonitrile (3ab)** <sup>[S1]</sup> was prepared according to the general working procedure and purified by column chromatography (petroleum ether/ethyl acetate = 50:1) to give the product as a white solid. 90% yield, 59.3mg. <sup>1</sup>H NMR (500 MHz, CDCl<sub>3</sub>) δ 8.00 – 7.96 (m, 1H), 7.79 (s, 1H), 7.75 – 7.70 (m, 2H), 7.51 – 7.43 (m, 3H), 7.38 – 7.28 (m, 3H), 2.43 (s, 3H). <sup>13</sup>C NMR (125 MHz, CDCl<sub>3</sub>) δ 141.2, 137.6, 134.4, 133.2, 130.6, 130.3, 129.4, 129.2, 128.2, 126.5, 126.2, 117.8, 113.9, 20.0.

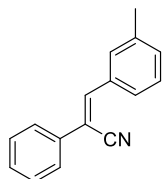

**(Z)-2-phenyl-3-(*m*-tolyl)acrylonitrile (3ac)** <sup>[S3]</sup> was prepared according to the general working procedure and purified by column chromatography (petroleum ether/ethyl acetate = 50:1) to give the product as a white solid. 92% yield, 60.7mg. <sup>1</sup>H NMR (500 MHz, CDCl<sub>3</sub>) δ 7.71-7.68 (m, 1H), 7.67 – 7.62 (m, 3H), 7.47 (s, 1H), 7.44 – 7.39 (m, 2H), 7.38 – 7.31 (m, 2H), 7.24 – 7.20 (m, 1H), 2.39 (s, 3H).. <sup>13</sup>C NMR (125 MHz, CDCl<sub>3</sub>) δ 142.5, 138.7, 134.6, 133.7, 131.45, 130.0, 129.2, 129.1, 128.9, 126.4, 126.0, 118.1, 111.4, 21.5.

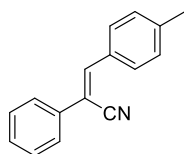

**(Z)-2-phenyl-3-(*p*-tolyl)acrylonitrile (3ad)** <sup>[S4]</sup> was prepared according to the general working procedure and purified by column chromatography (petroleum ether/ethyl acetate = 50:1) to give the product as a white solid. 91% yield, 60.1mg. <sup>1</sup>H NMR (500 MHz, CDCl<sub>3</sub>) δ 7.84 – 7.80 (m, 2H), 7.70 – 7.66 (m, 2H), 7.51 (s, 1H), 7.47 – 7.43 (m, 2H), 7.42 – 7.37 (m, 1H), 7.30 – 7.27 (m, 2H), 2.42 (s, 3H). <sup>13</sup>C NMR (125 MHz, CDCl<sub>3</sub>) δ 142.3, 141.2, 134.7, 131.1, 129.7, 129.4, 129.1, 129.0, 125.9, 118.3, 110.5, 21.6.

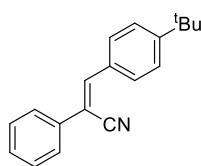

**(Z)-3-(4-(*tert*-butyl)phenyl)-2-phenylacrylonitrile (3ae)** <sup>[S4]</sup> was prepared according to the general working procedure and purified by column chromatography (petroleum ether/ethyl acetate = 50:1) to give the product as a white solid. 83% yield, 65.1mg. <sup>1</sup>H NMR (500 MHz, CDCl<sub>3</sub>) δ 7.89 – 7.84 (m, 2H), 7.71 – 7.67 (m, 2H), 7.53 (s, 1H), 7.52 – 7.49 (m, 2H), 7.47 – 7.39 (m, 3H), 1.37 (s, 9H). <sup>13</sup>C NMR (125 MHz, CDCl<sub>3</sub>) δ 154.3, 142.3, 134.8, 131.0, 129.3, 129.1, 129.0, 126.0, 125.9, 118.3, 110.6, 35.1, 31.2.

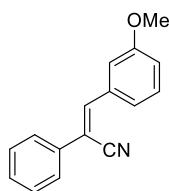

**(Z)-3-(3-methoxyphenyl)-2-phenylacrylonitrile (3af)** <sup>[S2]</sup> was prepared according to the general working procedure and purified by column chromatography (petroleum ether/ethyl acetate = 50:1) to give the product as a white solid. 93% yield, 65.6mg. <sup>1</sup>H NMR (500 MHz, CDCl<sub>3</sub>) δ 7.71 – 7.67 (m, 2H), 7.55 – 7.52 (m, 1H), 7.51 (s, 1H), 7.47 – 7.36 (m, 5H), 7.00 (dd, *J* = 8.1, 2.1 Hz, 1H), 3.88 (s, 3H). <sup>13</sup>C NMR (125 MHz, CDCl<sub>3</sub>) δ 159.9, 142.3, 135.0, 134.5, 130.0, 129.3, 129.1, 126.1, 122.3, 118.1, 117.1, 113.5, 111.9, 55.5.

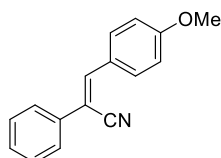

**(Z)-3-(4-methoxyphenyl)-2-phenylacrylonitrile (3ag)** <sup>[S4]</sup> was prepared according to the general working procedure and purified by column chromatography (petroleum ether/ethyl acetate = 50:1) to give the product as a white solid. 89% yield, 62.8mg. <sup>1</sup>H NMR (500 MHz, CDCl<sub>3</sub>) δ 7.91 – 7.88 (m, 2H), 7.67 – 7.64 (m, 2H), 7.46 (s, 1H), 7.45 – 7.37 (m, 3H), 6.99 – 6.97 (m, 2H), 3.86 (s, 3H). <sup>13</sup>C NMR (125 MHz, CDCl<sub>3</sub>) δ 161.4, 141.9, 134.9, 131.2, 129.0, 128.8, 126.5, 125.8, 118.6, 114.4, 108.6, 55.5.

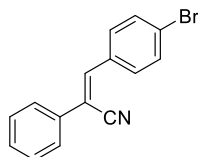

**(Z)-3-(4-bromophenyl)-2-phenylacrylonitrile (3ah)** <sup>[S2]</sup> was prepared according to the general working procedure and purified by column chromatography (petroleum ether/ethyl acetate = 50:1) to give the product as a white solid. 78% yield, 66.5mg. <sup>1</sup>H NMR (500 MHz, CDCl<sub>3</sub>) δ 7.78 – 7.74 (m, 2H), 7.69 – 7.66 (m, 2H), 7.62 – 7.59 (m, 2H), 7.48 – 7.41 (m, 4H). <sup>13</sup>C NMR (125 MHz, CDCl<sub>3</sub>) δ 140.9, 134.3, 132.7, 132.4, 130.8, 129.6, 129.3, 126.1, 125.0, 117.9, 112.5.

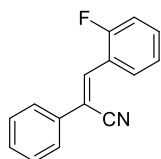

**(Z)-3-(2-fluorophenyl)-2-phenylacrylonitrile (3ai)** <sup>[S5]</sup> was prepared according to the general working procedure and purified by column chromatography (petroleum ether/ethyl acetate = 50:1) to give the product as a white solid. 87% yield, 58.3mg. <sup>1</sup>H NMR (500 MHz, CDCl<sub>3</sub>) δ 8.30 – 8.22 (m, 1H), 7.77 (s, 1H), 7.71 – 7.67 (m, 2H), 7.48 – 7.38 (m, 4H), 7.26 – 7.23 (m, 1H), 7.16 – 7.11 (m, 1H). <sup>13</sup>C NMR (125 MHz, CDCl<sub>3</sub>) δ 161.0 (d, *J* = 252.7 Hz), 134.2, 133.7 (d, *J* = 6.8 Hz), 132.3 (d, *J* = 9.0 Hz), 129.6, 129.2, 128.6, 126.2, 124.7 (d, *J* = 3.7 Hz), 122.1 (d, *J* = 11.3 Hz), 117.7, 115.82 (d, *J* = 21.7 Hz), ) δ 113.8 (d, *J* = 1.7 Hz). <sup>19</sup>F NMR (470 MHz, CDCl<sub>3</sub>) δ -114.5.

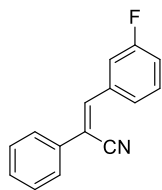

**(Z)-3-(3-fluorophenyl)-2-phenylacrylonitrile (3aj)** <sup>[S9]</sup> was prepared according to the general working procedure and purified by column chromatography (petroleum ether/ethyl acetate = 50:1) to give the product as a white solid. 94% yield, 62.9mg. <sup>1</sup>H NMR (500 MHz, CDCl<sub>3</sub>) δ 7.67 – 7.56 (m, 4H), 7.45 (s, 1H), 7.44 – 7.36 (m, 4H), 7.12 – 7.07 (m, 1H). <sup>13</sup>C NMR (125 MHz, CDCl<sub>3</sub>) δ 162.8 (d, *J* = 246.9 Hz), 140.6 (d, *J* = 2.6 Hz), 135.8 (d, *J* = 7.6 Hz), 134.0, 130.6 (d, *J* = 8.2 Hz), 129.6, 129.2, 126.1, 125.3 (d, *J* = 2.8 Hz), 117.6, 117.5 (d, *J* = 21.2 Hz), 115.7 (d, *J* = 22.9 Hz), 113.1. <sup>19</sup>F NMR (470 MHz, CDCl<sub>3</sub>) δ -111.5.

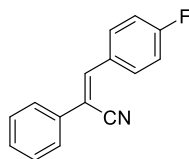

**(Z)-3-(4-fluorophenyl)-2-phenylacrylonitrile (3ak)** <sup>[S1]</sup> was prepared according to the general working procedure and purified by column chromatography (petroleum ether/ethyl acetate = 50:1) to give the product as a white solid. 95% yield, 63.6mg. <sup>1</sup>H NMR (500 MHz, CDCl<sub>3</sub>) δ 7.92 – 7.88 (m, 2H), 7.69 – 7.65 (m, 2H), 7.49 (s, 1H), 7.47 – 7.40 (m, 3H), 7.17 – 7.13 (m, 2H). <sup>13</sup>C NMR (125 MHz, CDCl<sub>3</sub>) δ 163.7 (d, *J* = 252.8 Hz), 140.9, 134.3, 131.4 (d, *J* = 8.8 Hz), 130.0 (d, *J* = 2.9 Hz), 129.3 (d, *J* = 22.1 Hz), 126.0, 125.0, 118.0, 116.2 (d, *J* = 22.0 Hz), 111.4 (d, *J* = 1.9 Hz). <sup>19</sup>F NMR (470 MHz, CDCl<sub>3</sub>) δ -108.2.

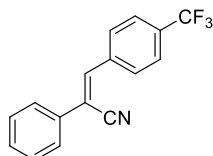

**(Z)-2-phenyl-3-(4-(trifluoromethyl)phenyl)acrylonitrile (3al)** <sup>[S2]</sup> was prepared according to the general working procedure and purified by column chromatography (petroleum ether/ethyl acetate = 50:1) to give the product as a white solid. 91% yield, 74.6mg. <sup>1</sup>H NMR (500 MHz, CDCl<sub>3</sub>) δ 7.97 (d, *J* = 8.5 Hz, 2H), 7.73 – 7.68 (m, 4H), 7.57 (s, 1H), 7.49 – 7.43 (m, 3H). <sup>13</sup>C NMR (125 MHz, CDCl<sub>3</sub>) δ 140.1, 137.1, 133.8, 131.8 (q, *J* = 32.6 Hz), 129.9, 129.5, 129.3, 126.2, 125.9 (q, *J* = 3.7 Hz), 123.8 (q, *J* = 272.6 Hz), 117.5, 114.4. <sup>19</sup>F NMR (470 MHz, CDCl<sub>3</sub>) δ -62.8.

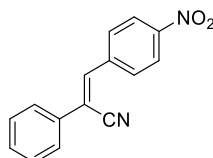

**(Z)-3-(4-nitrophenyl)-2-phenylacrylonitrile (3am)** <sup>[S14]</sup> was prepared according to the general working procedure and purified by column chromatography (petroleum ether/ethyl acetate = 50:1) to give the product as a white solid. 35% yield, 26.3mg. <sup>1</sup>H NMR (500 MHz, CDCl<sub>3</sub>) δ 8.32 – 8.27 (m, 2H), 8.05 – 8.00 (m, 2H), 7.74 – 7.69 (m, 2H), 7.60 (s, 1H), 7.51 – 7.45 (m, 3H). <sup>13</sup>C NMR (125 MHz, CDCl<sub>3</sub>) δ 148.3, 139.7, 139.0, 133.5, 130.3, 130.0, 129.4, 126.3, 124.2, 117.2, 116.0.

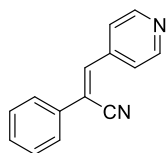

**(Z)-2-phenyl-3-(pyridin-4-yl)acrylonitrile (3aq)** <sup>[S6]</sup> was prepared according to the general working procedure and purified by column chromatography (petroleum ether/ethyl acetate = 50:1) to give the product as a white solid. 96% yield, 59.4mg. <sup>1</sup>H NMR (500 MHz, CDCl<sub>3</sub>) δ 8.73 – 8.70 (m, 2H), 7.71 – 7.66 (m, 4H), 7.47 (s, 1H), 7.46 – 7.42 (m, 3H). <sup>13</sup>C NMR (125 MHz, CDCl<sub>3</sub>) δ 150.5, 140.6, 138.7, 133.2, 130.1, 129.2, 126.2, 122.6, 116.8, 116.3.

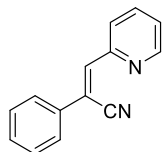

**(Z)-2-phenyl-3-(pyridin-2-yl)acrylonitrile (3ar)** <sup>[S15]</sup> was prepared according to the general working procedure and purified by column chromatography (petroleum ether/ethyl acetate = 6:1) to give the product as a colorless oil. 93% yield, 57.5mg. <sup>1</sup>H NMR (500 MHz, CDCl<sub>3</sub>) δ 8.76 (d, *J* = 4.5 Hz, 1H), 7.96 (d, *J* = 7.9 Hz, 1H), 7.82–7.80 (m, 1H), 7.77 – 7.73 (m, 2H), 7.65 (s, 1H), 7.49 – 7.41 (m, 3H), 7.32–7.29 (m, 1H). <sup>13</sup>C NMR (125 MHz, CDCl<sub>3</sub>) δ 152.4, 150.2, 141.2, 137.0, 134.1, 129.9, 129.3, 126.5, 124.4, 124.2, 117.6, 115.1.

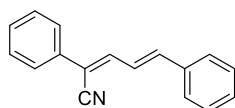

**(2Z,4E)-2,5-diphenylpenta-2,4-dienitrile (3as)** <sup>[S4]</sup> was prepared according to the general working procedure and purified by column chromatography (petroleum ether/ethyl acetate = 50:1) to give the product as a white solid. 65% yield, 45.1mg. <sup>1</sup>H NMR (500 MHz, CDCl<sub>3</sub>) δ 7.66 – 7.62 (m, 2H), 7.58 – 7.55 (m, 2H), 7.44 – 7.36 (m, 8H), 7.05 – 7.01 (m, 1H). <sup>13</sup>C NMR (125 MHz, CDCl<sub>3</sub>) δ 141.7, 141.3, 135.8, 133.3, 129.6, 129.2, 129.1, 129.0, 127.6, 125.7, 125.2, 117.1, 113.2.

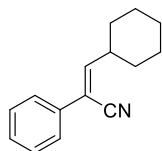

**(Z)-3-cyclohexyl-2-phenylacrylonitrile (3at)** <sup>[S10]</sup> was prepared according to the general working procedure and purified by column chromatography (petroleum ether/ethyl acetate = 50:1) to give the product as a white solid. 94% yield, 59.6mg. <sup>1</sup>H NMR (500 MHz, CDCl<sub>3</sub>) δ 7.57 – 7.50 (m, 2H), 7.40–7.38 (m, 2H), 7.37 – 7.32 (m, 1H), 6.66 (d, *J* = 10.0 Hz, 1H), 2.82 – 2.72 (m, 1H), 1.86 – 1.77 (m, 4H), 1.75–1.70 (m, 1H), 1.46 – 1.36 (m, 2H), 1.30 – 1.21 (m, 3H). <sup>13</sup>C NMR (125 MHz, CDCl<sub>3</sub>) δ 152.1, 133.3, 128.9, 128.8, 125.7, 116.7, 113.8, 41.4, 32.2, 25.6, 25.3.

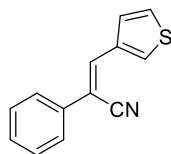

**(Z)-2-phenyl-3-(thiophen-3-yl)acrylonitrile (3at)** <sup>[S16]</sup> was prepared according to the general working procedure and purified by column chromatography (petroleum ether/ethyl acetate = 50:1) to give the product as a white solid. 40% yield, 25.4mg. <sup>1</sup>H NMR (500 MHz, CDCl<sub>3</sub>) δ 7.96 – 7.94 (m, 1H), 7.81 –

7.78 (m, 1H), 7.67 – 7.63 (m, 2H), 7.54 (s, 1H), 7.47 – 7.37 (m, 4H). <sup>13</sup>C NMR (125 MHz, CDCl<sub>3</sub>) δ 136.1, 135.4, 134.2, 129.6, 129.1, 129.0, 127.4, 126.7, 125.8, 118.5, 109.8.

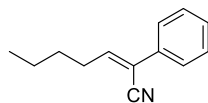

**(Z)-2-phenylhept-2-enenitrile (3ax)** <sup>[S13]</sup> was prepared according to the general working procedure and purified by column chromatography (petroleum ether/ethyl acetate = 50:1) to give the product as a white solid. 85% yield, 47.2mg. <sup>1</sup>H NMR (500 MHz, CDCl<sub>3</sub>) δ 7.58 – 7.51 (m, 2H), 7.42 – 7.34 (m, 3H), 6.83 (t, *J* = 7.8 Hz, 1H), 2.60 (q, *J* = 7.6 Hz, 2H), 1.58 – 1.52 (m, 2H), 1.47 – 1.41 (m, 2H), 0.96 (t, *J* = 7.3 Hz, 3H). <sup>13</sup>C NMR (125 MHz, CDCl<sub>3</sub>) δ 147.4, 133.5, 129.1, 129.0, 125.7, 116.8, 116.0, 32.0, 30.9, 22.4, 14.0.

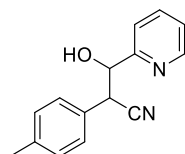

**3-hydroxy-3-(pyridin-2-yl)-2-(p-tolyl)propanenitrile (2:3 dr) (5)** <sup>[S17]</sup> was prepared according to the general working procedure and purified by column chromatography (petroleum ether/ethyl acetate = 4:1) to give the product as a white solid. 40% yield, 285.9mg. <sup>1</sup>H NMR (500 MHz, CDCl<sub>3</sub>) δ 8.59 – 8.57 (m, 1H), 7.62 (td, *J* = 7.7, 1.7 Hz, 1H), 7.29-7.28 (m, 2H), 7.12 – 7.08 (m, 4H), 6.90 (d, *J* = 7.8 Hz, 1H), 5.06 (d, *J* = 5.7 Hz, 1H), 4.31 (d, *J* = 5.6 Hz, 1H), 2.34 (s, 3H). <sup>13</sup>C NMR (125 MHz, CDCl<sub>3</sub>) δ 156.2, 148.6, 138.5, 136.7, 129.7, 128.7, 128.6, 123.8, 122.2, 118.8, 74.6, 45.7, 21.3.

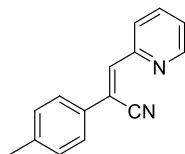

**(Z)-3-(pyridin-2-yl)-2-(p-tolyl)acrylonitrile (6)** <sup>[S15]</sup> was prepared according to the general working procedure and purified by column chromatography (petroleum ether/ethyl acetate = 6:1) to give the product as a yellow solid. 97% yield, 64.1mg. <sup>1</sup>H NMR (500 MHz, CDCl<sub>3</sub>) δ 8.74 (d, *J* = 4.1 Hz, 1H), 7.97 – 7.92 (m, 1H), 7.79 (td, *J* = 7.8, 1.7 Hz, 1H), 7.65 – 7.62 (m, 2H), 7.61 (s, 1H), 7.32-7.28 (m, 1H), 7.26 – 7.24 (m, 2H), 2.39 (s, 3H). <sup>13</sup>C NMR (125 MHz, CDCl<sub>3</sub>) δ 152.4, 150.0, 140.2, 140.0, 136.9, 131.2, 129.9, 126.3, 124.2, 124.0, 117.6, 115.0, 21.4.

## Reference

- S1. K. Paudel, S. Xu, K.-Y. Ding. *Org. Lett.* 2021, **23**, 5028-5032.
- S2. S. Pal, A.- K. Guin, S. Khanra, N.- D. Paul. *J. Org. Chem.* 2025, **90**, 225-239.
- S3. A.-K. Guin, S. Chakraborty, S. Khanra, S. Chakraborty, N.-D. Paul. *Org. Lett.* 2024, **26**, 2540-2545.
- S4. R.-R. Putta, S. Chun, S.-B. Lee, J. Hong, S.-H. Choi, D.-C. Oh, S. Hong. *J. Org. Chem.* 2022, **87**, 16378-16389.
- S5. A.-K. Bains, Y. Ankit, D. Adhikari. *Org. Lett.* 2021, **23**, 2019-2023.
- S6. A. Shakenov, K.- P. Gnyawali, C.-S. Yi. *J. Org. Chem.* 2025, **90**, 1733-1739.
- S7. R.-Y. Ye, J.-L. Ming, Q.-Y Tao, T.-Y. Gao, J.-H. Ye, D.-G. Yu, X.-G. Zhou. *Sci China Chem*, 2025, **68**: 499–504.
- S8. N. Mukherjee, P.-K. Parida, A. Santra, T. Ghosh, A. Dutta, K. Jana, A.-K. Misra, S. Sinha Babu. *Free Radical Biology and Medicine*, **93** (2016) 130–144.
- S9. A. Palermo, B.-S.-Y. Chiu, P. Patel, S.-L. Rousseaux. *J. Am. Chem. Soc.* 2023, **145**, 24981-24989.
- S10. K. Ebitani, K. Motokura, K. Mori, T. Mizugaki, K. Kaneda. *J. Org. Chem.* 2006, **71**, 5440-5447.
- S11. Y.-Q. Shen, C.-P. Yuan, X.-Y. Zhu, Q. Chen, S.-J. Lu, H.-B. Xie. *Green Chem.* 2021, **23**, 9922-9934.
- S12. Y. Yang, B.-Y. Han, F.-H. Dong, J.-W. Lv, H.-M. Lu, Y.-Q. Sun, Z.-Q. Lei, Z.-M. Yang, H.-C. Ma. *Org. Lett.* 2022, **24**, 4409-4414.
- S13. LINIGER, Marc. PCT/EP2024/067262.
- S14. M.-S. Alam, Y.-J. Nam, D.-U. Lee. *European Journal of Medicinal Chemistry*. **69** (2013) 790-797.
- S15. R.-N. Wang, S.-W. Wang, D.-Y. Li, F.-Y. Ye, Y.-T. Leng, Y.-J. Wu, J.-b. Chang, Y.-S. Wu, *Tetrahedron* 75 (2019) 2298-2305.
- S16. C.-N. Robinson, L.-J. Wiseman. *Tetrahedron*. 1989, **45**, 4103-4112.
- S17. P.-R. Carlier, K.-M. Lo, M.-M.-C. Lo, I.-D. Williams. *J.Org. Chem.* 1995, **60**, 7511-7517.

## Copies of NMR spectra

### (Z)-2,3-diphenylacrylonitrile (3aa)

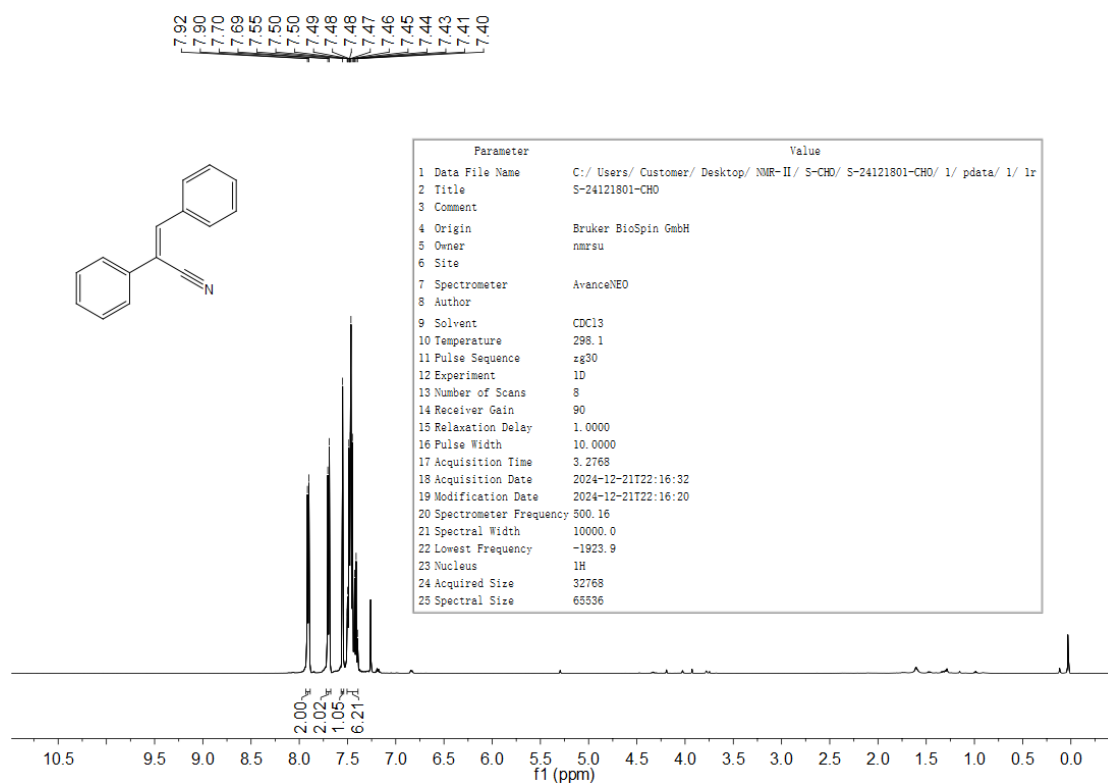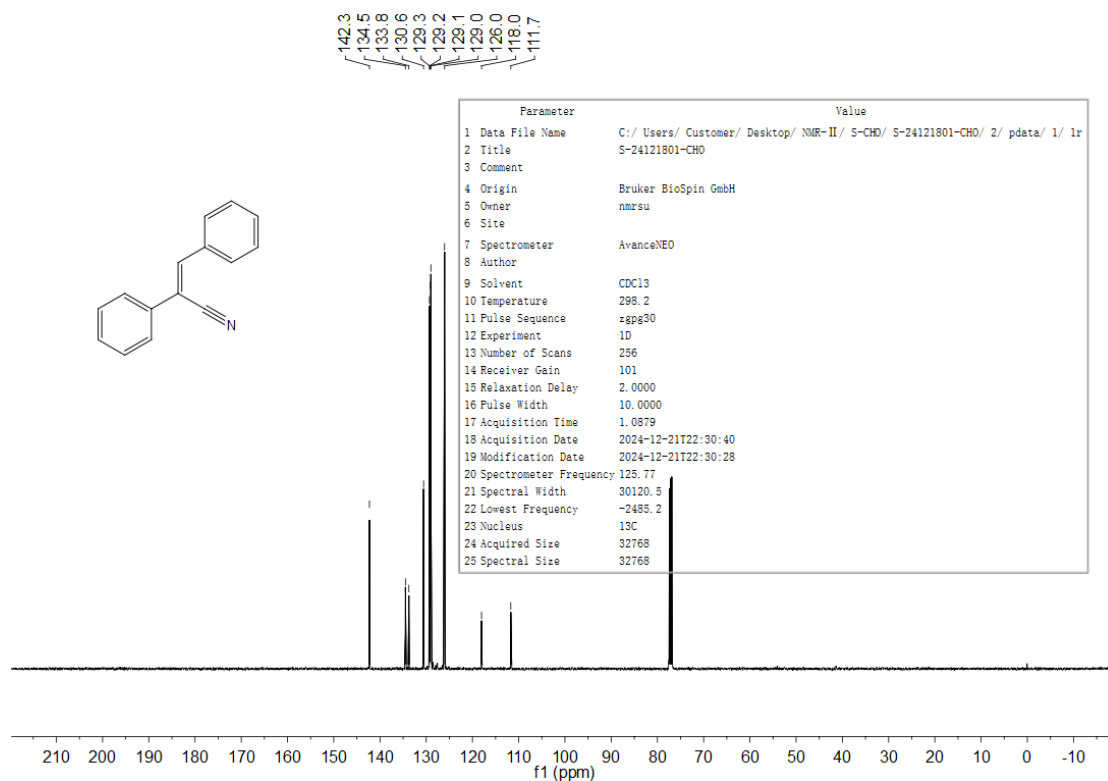

### (Z)-3-phenyl-2-(o-tolyl)acrylonitrile (3ba)

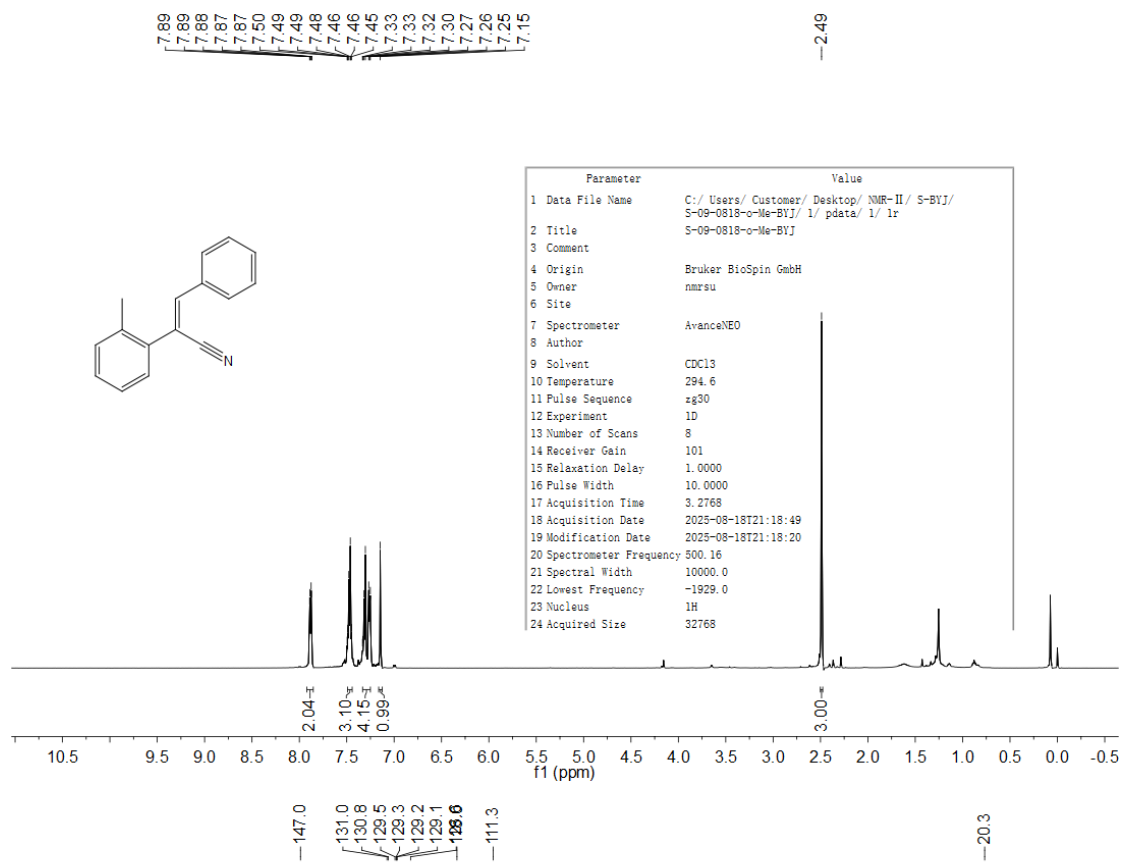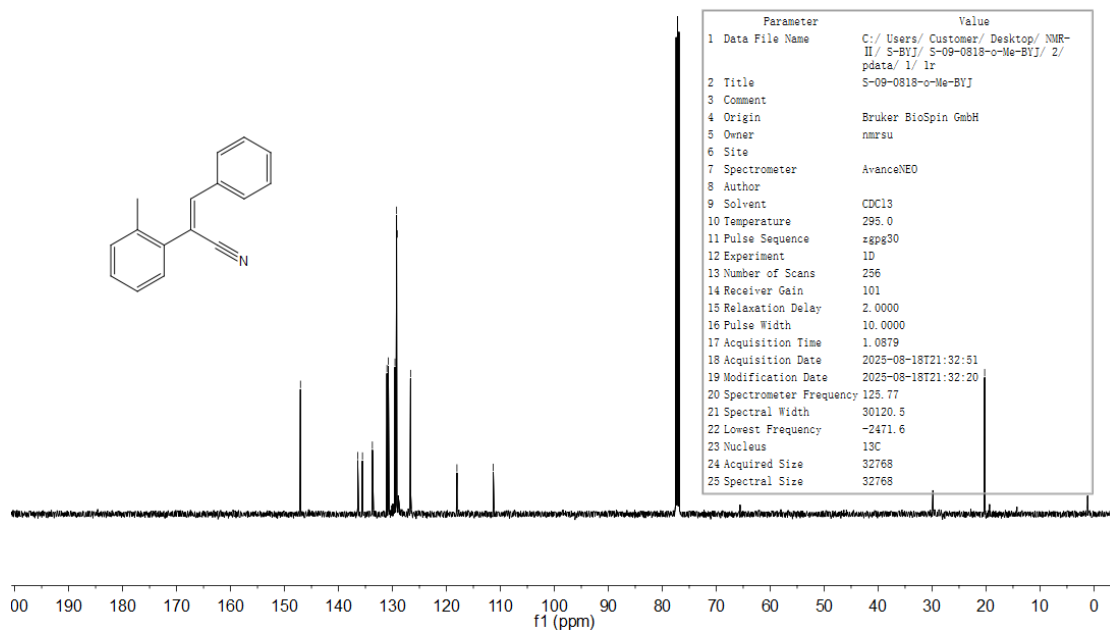

**(Z)-3-phenyl-2-(*m*-tolyl)acrylonitrile (3ca)**



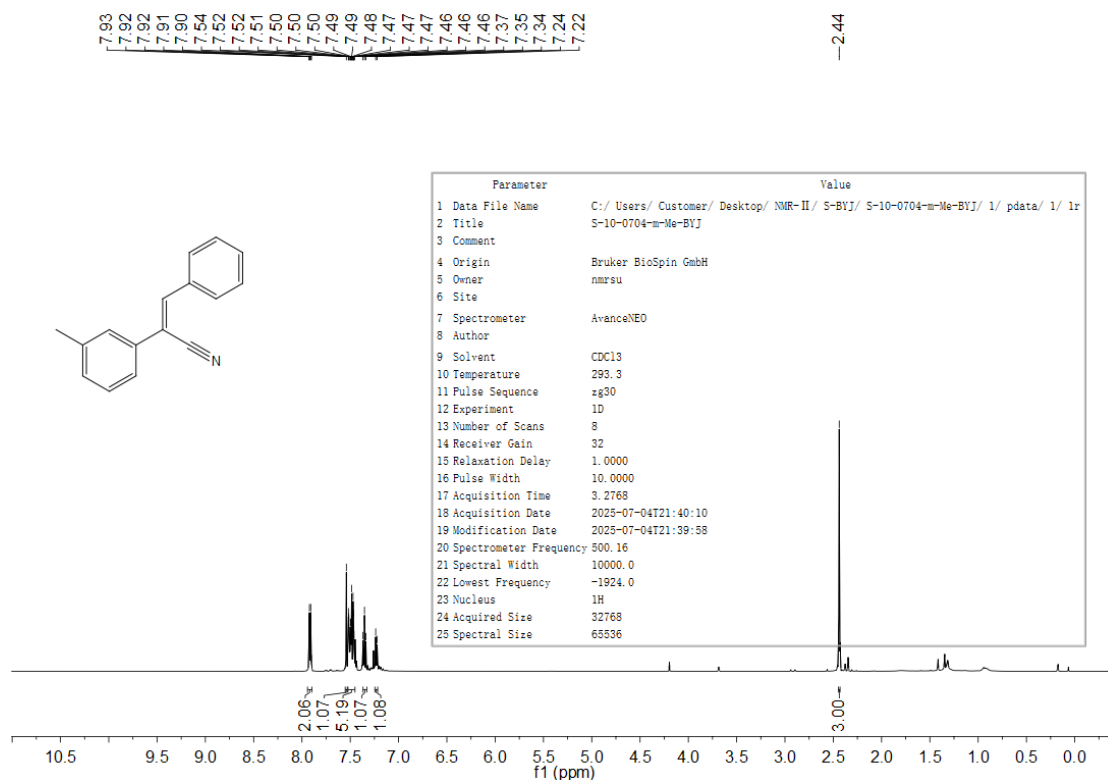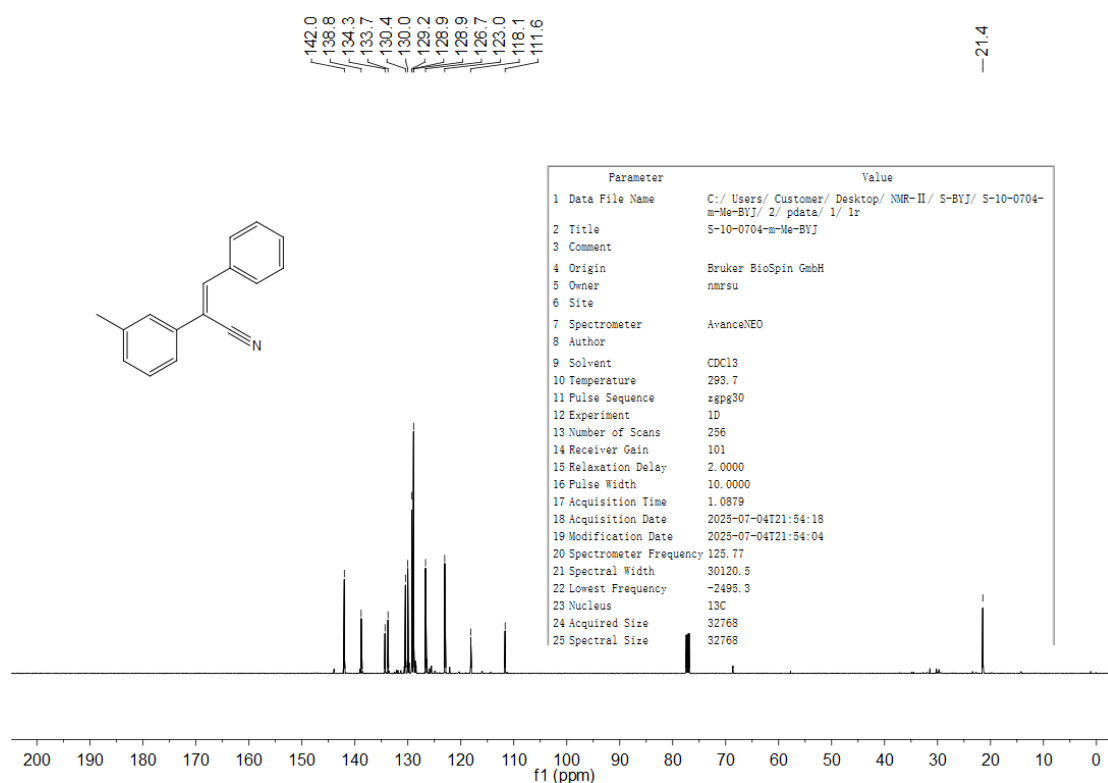

(Z)-3-phenyl-2-(p-tolyl)acrylonitrile (3da)

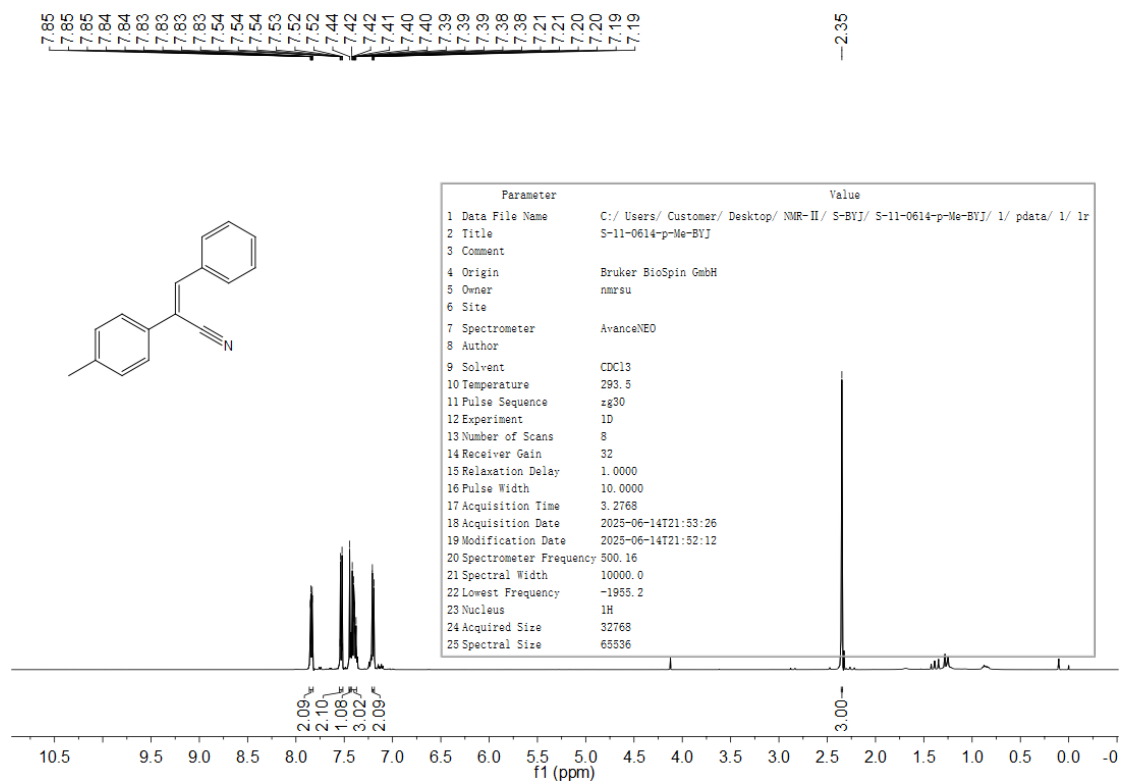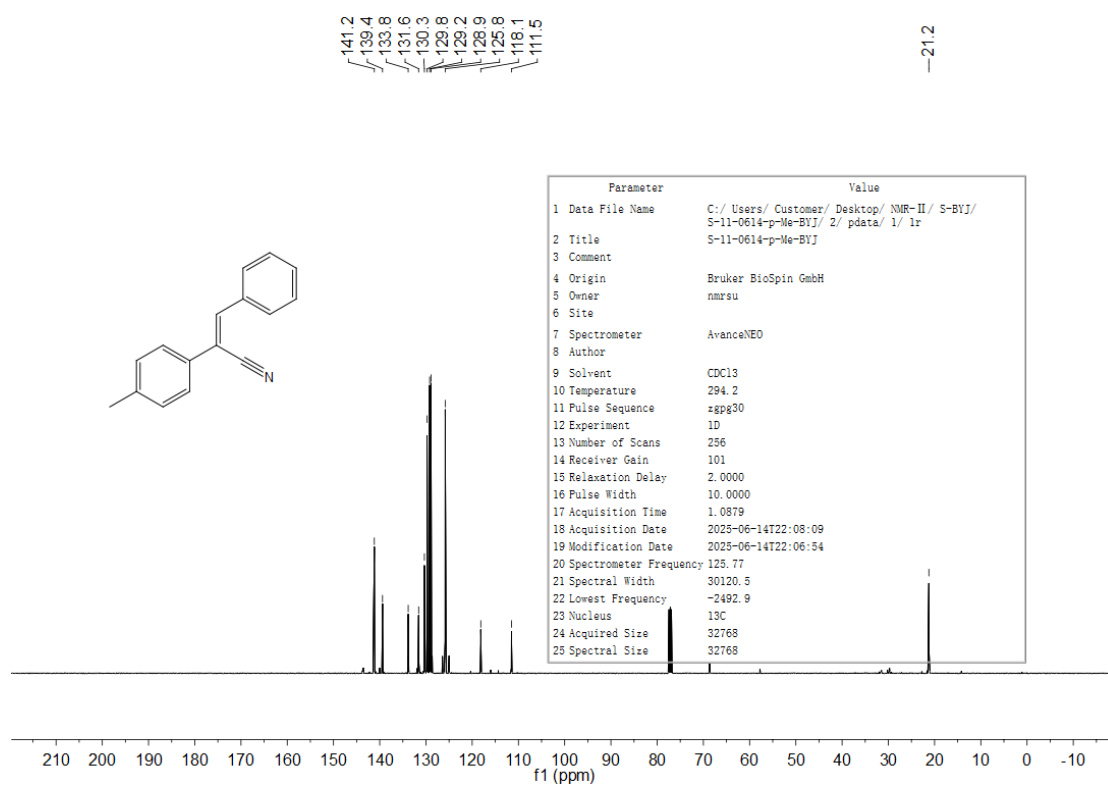

**(Z)-2-(4-(*tert*-butyl)phenyl)-3-phenylacrylonitrile (3ea)**

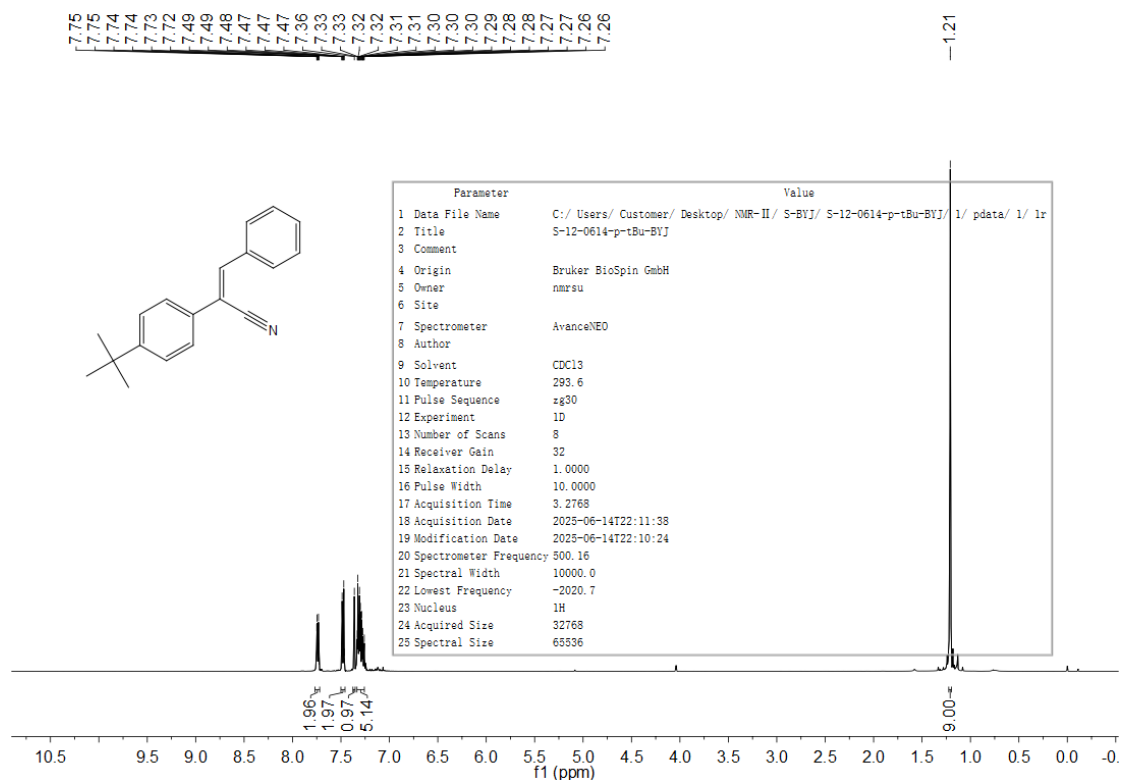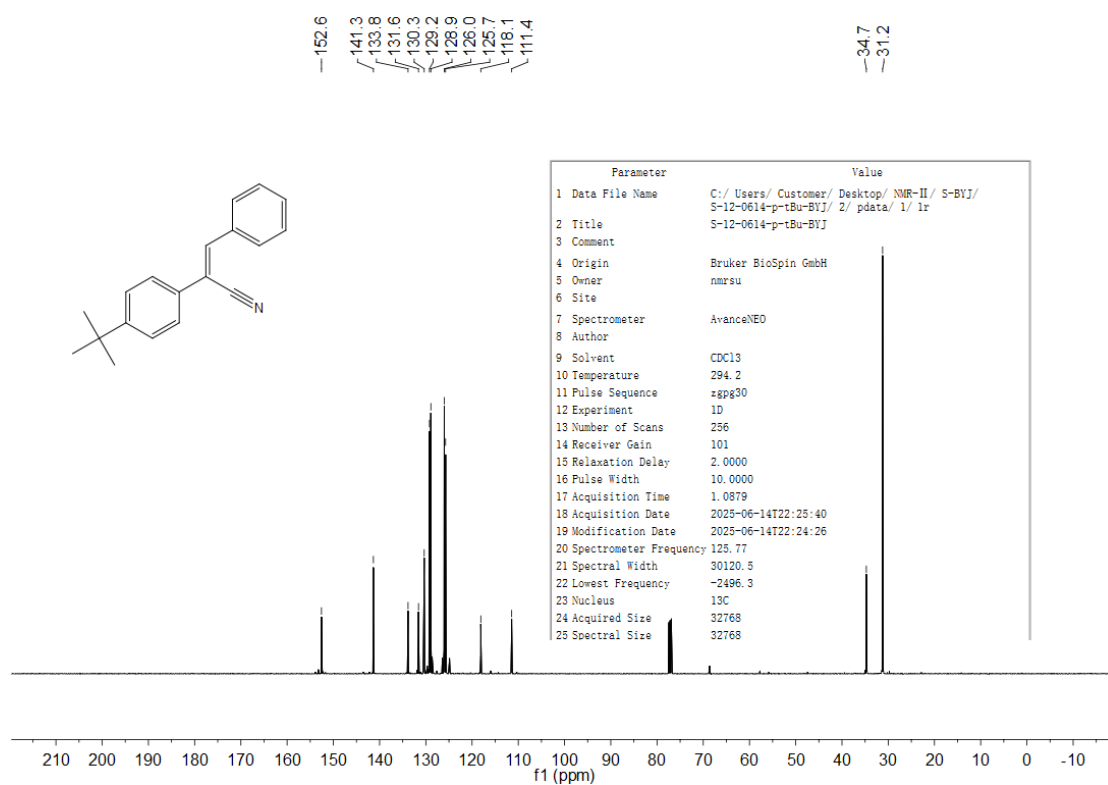

(Z)-2-(3-methoxyphenyl)-3-phenylacrylonitrile (3fa)

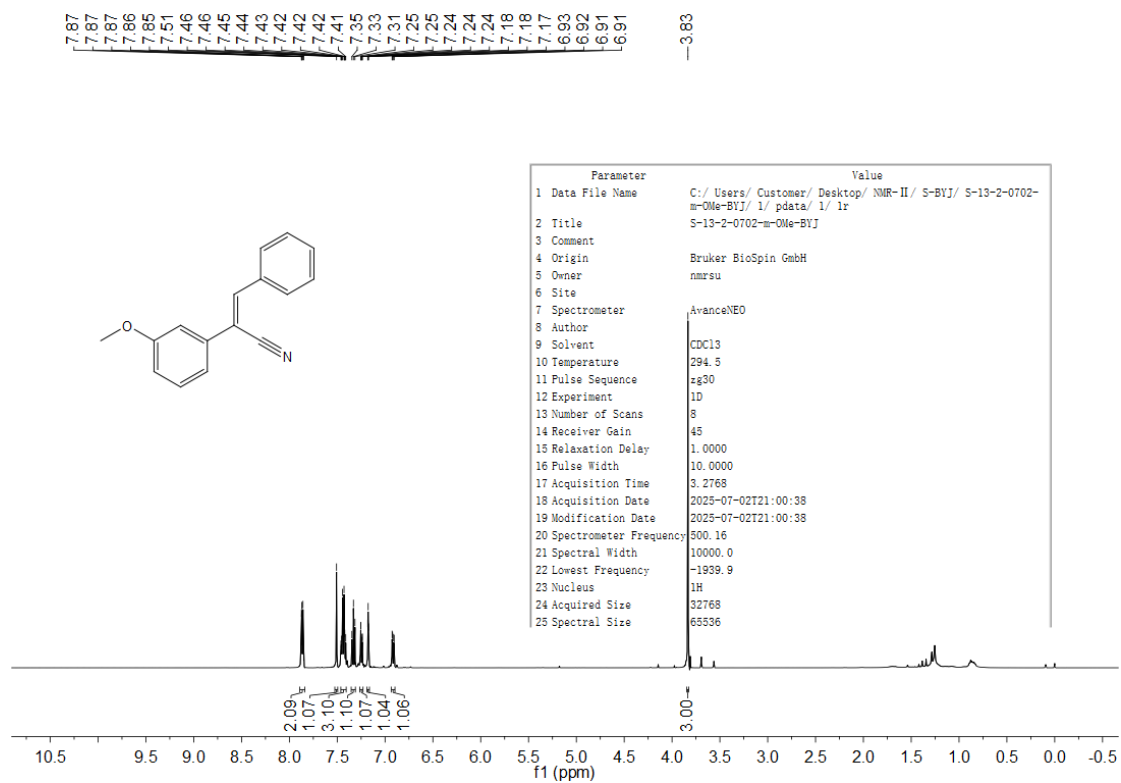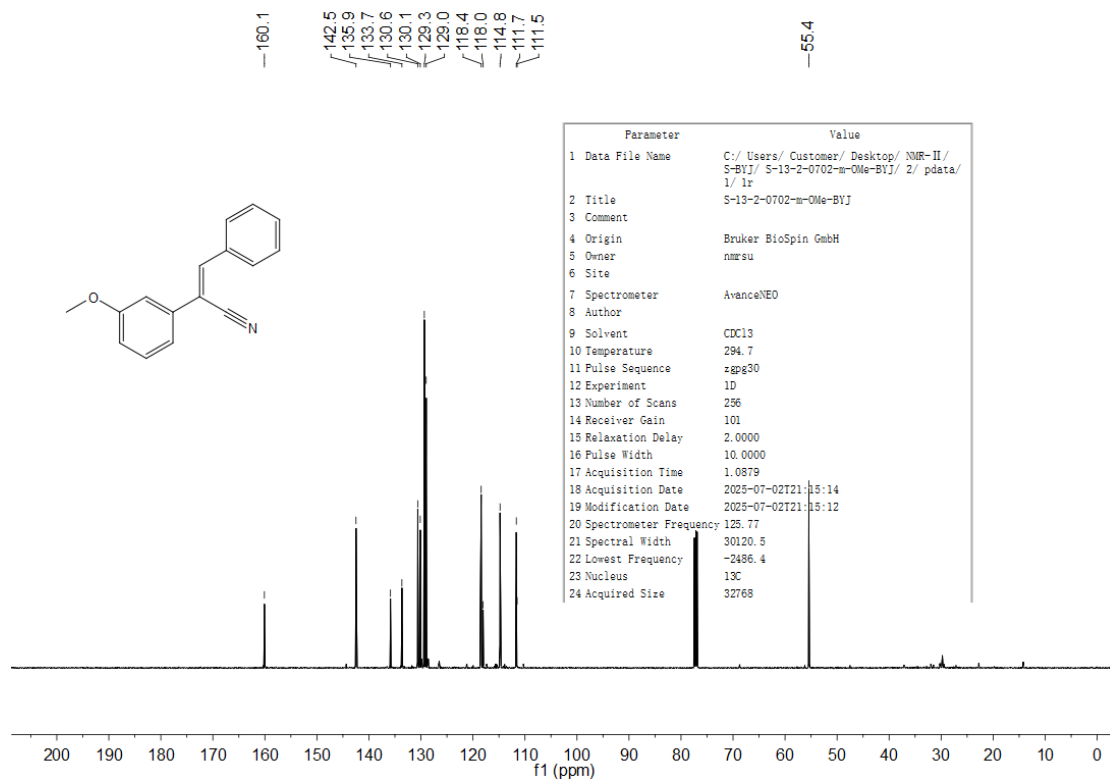

**(Z)-2-(4-methoxyphenyl)-3-phenylacrylonitrile (3ga)**

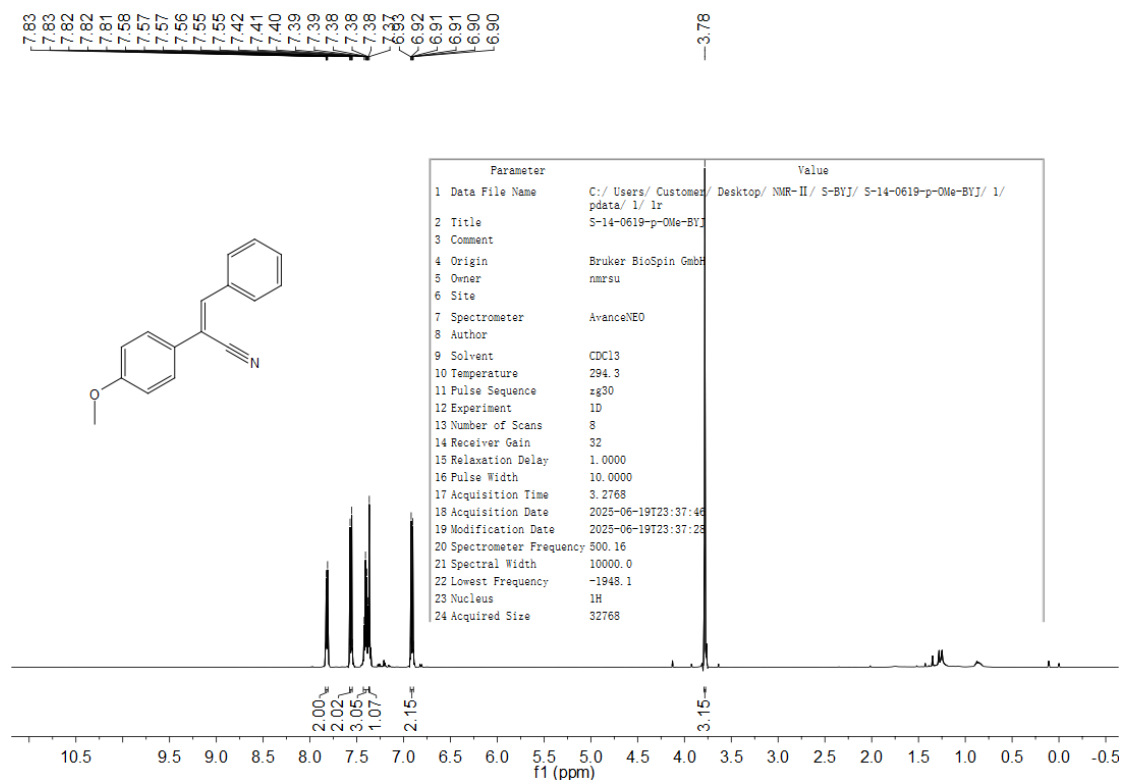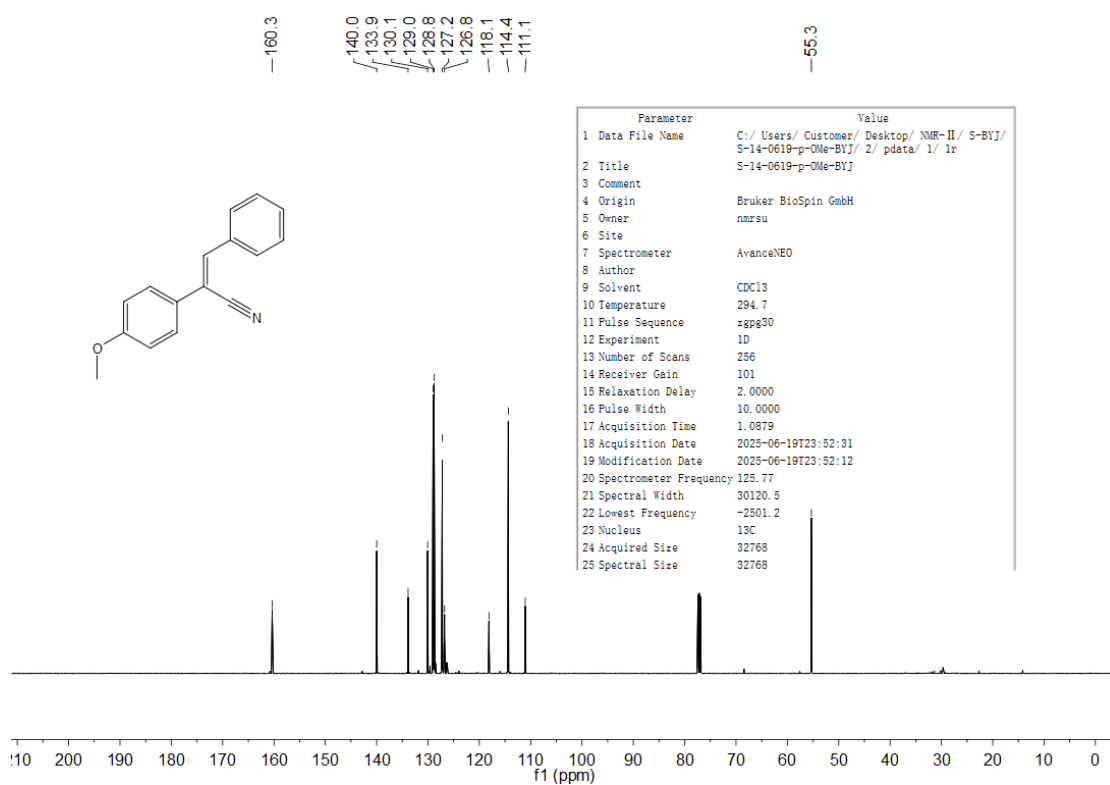

**(Z)-2-(4-bromophenyl)-3-phenylacrylonitrile (3ha)**

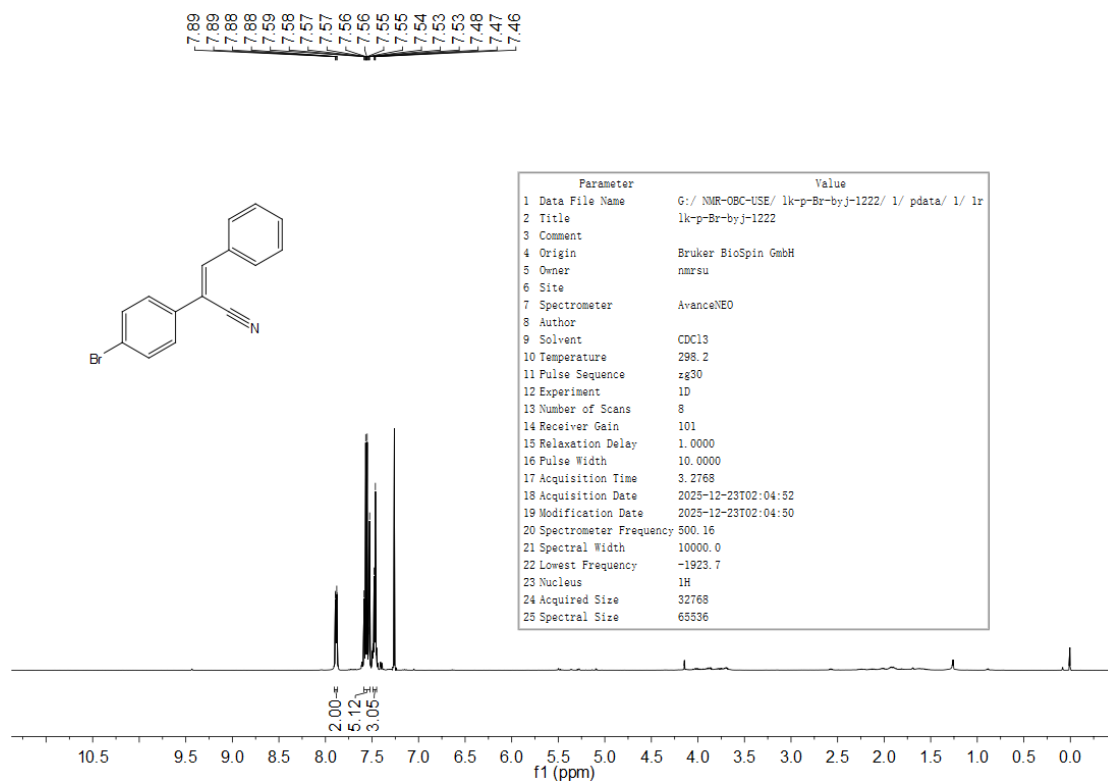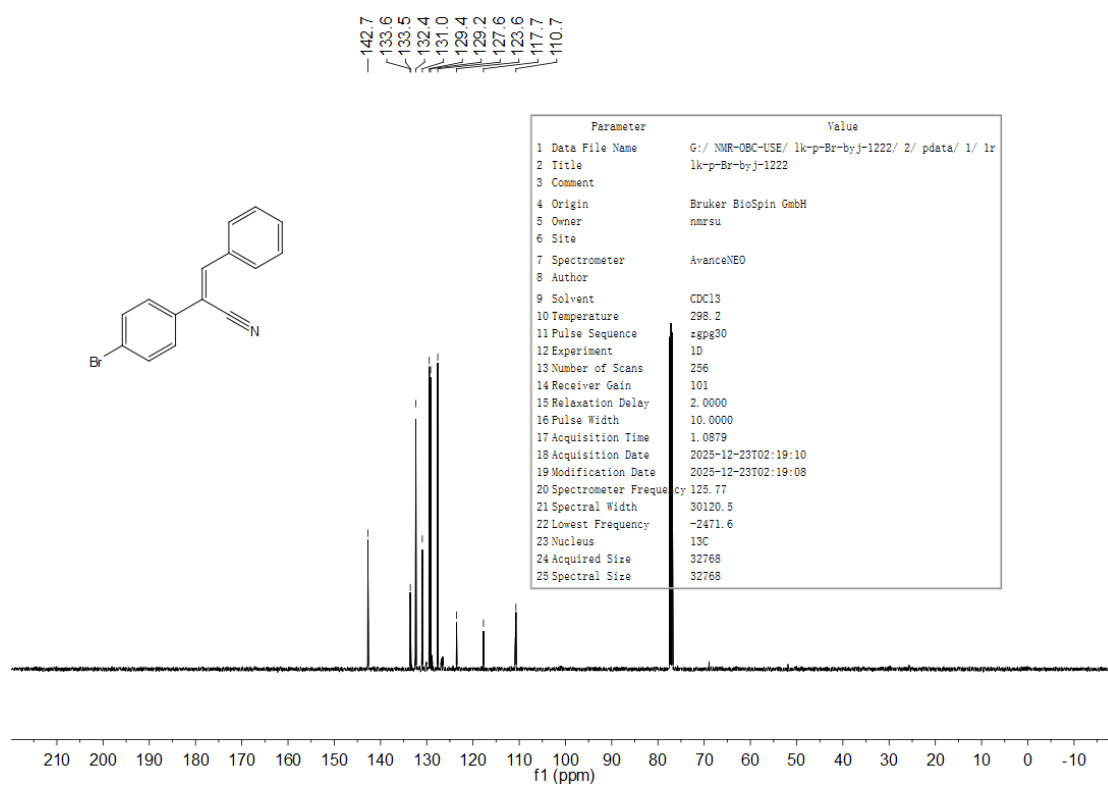

**(Z)-2-(3-fluorophenyl)-3-phenylacrylonitrile (3ia)**

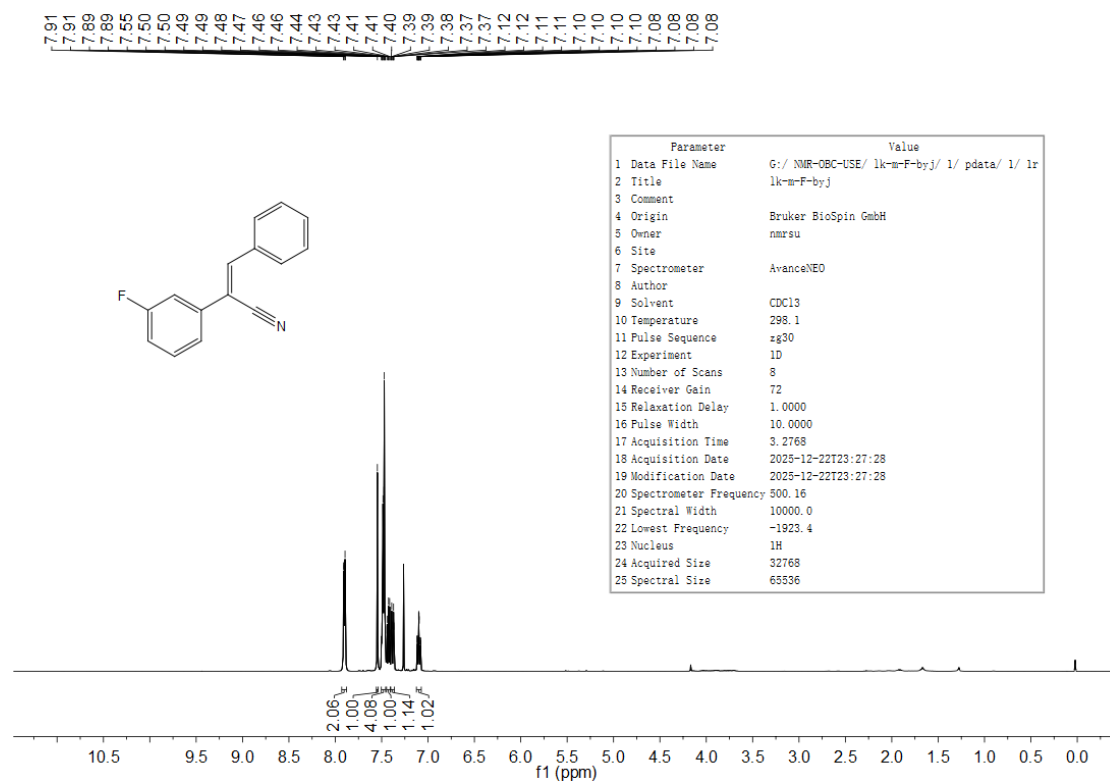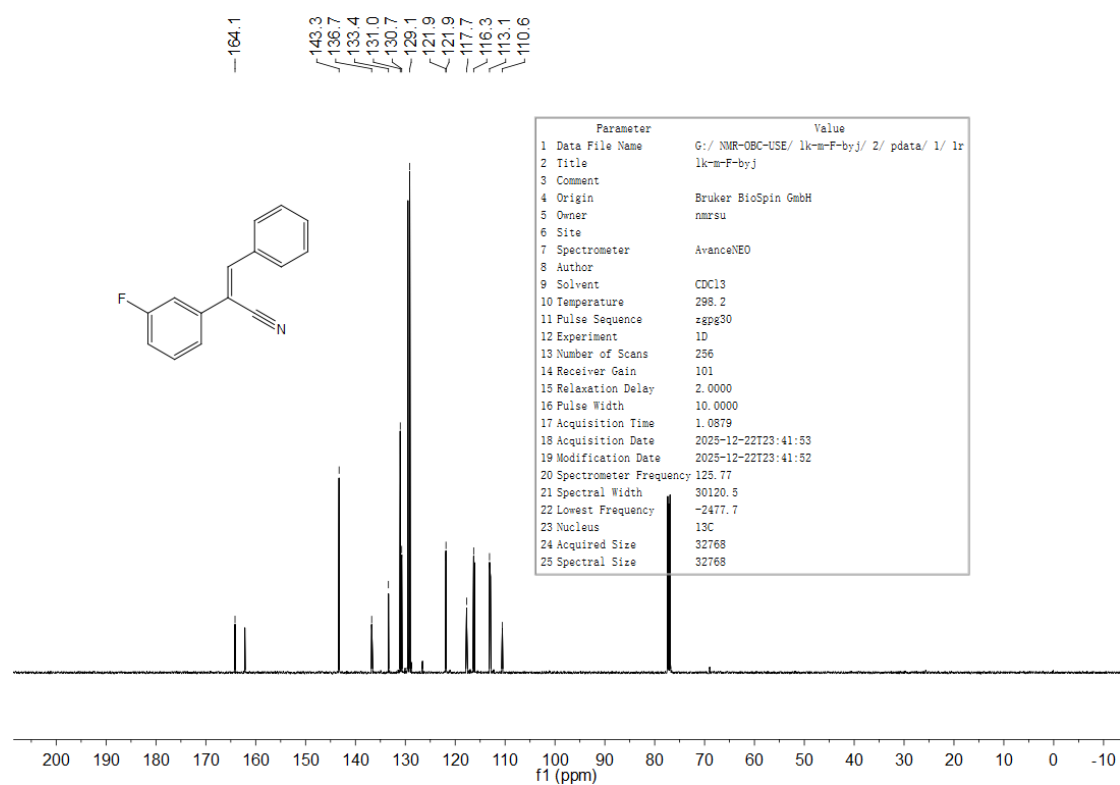

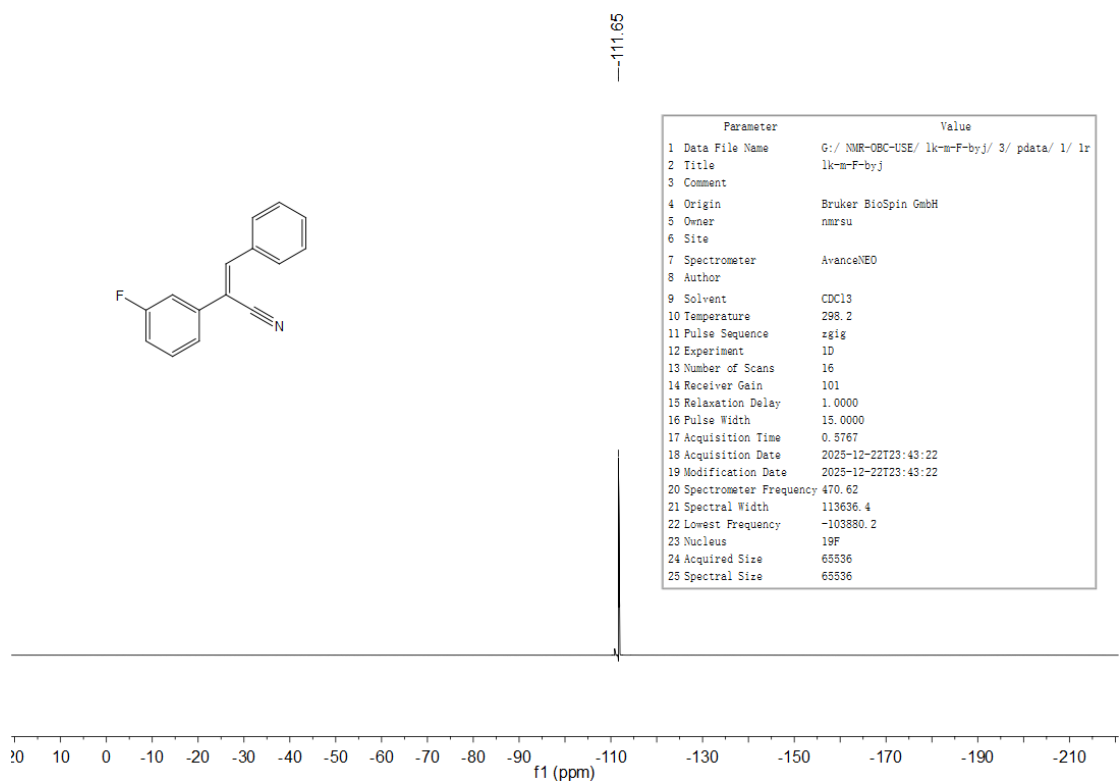

**(Z)-2-(4-fluorophenyl)-3-phenylacrylonitrile (3ja)**

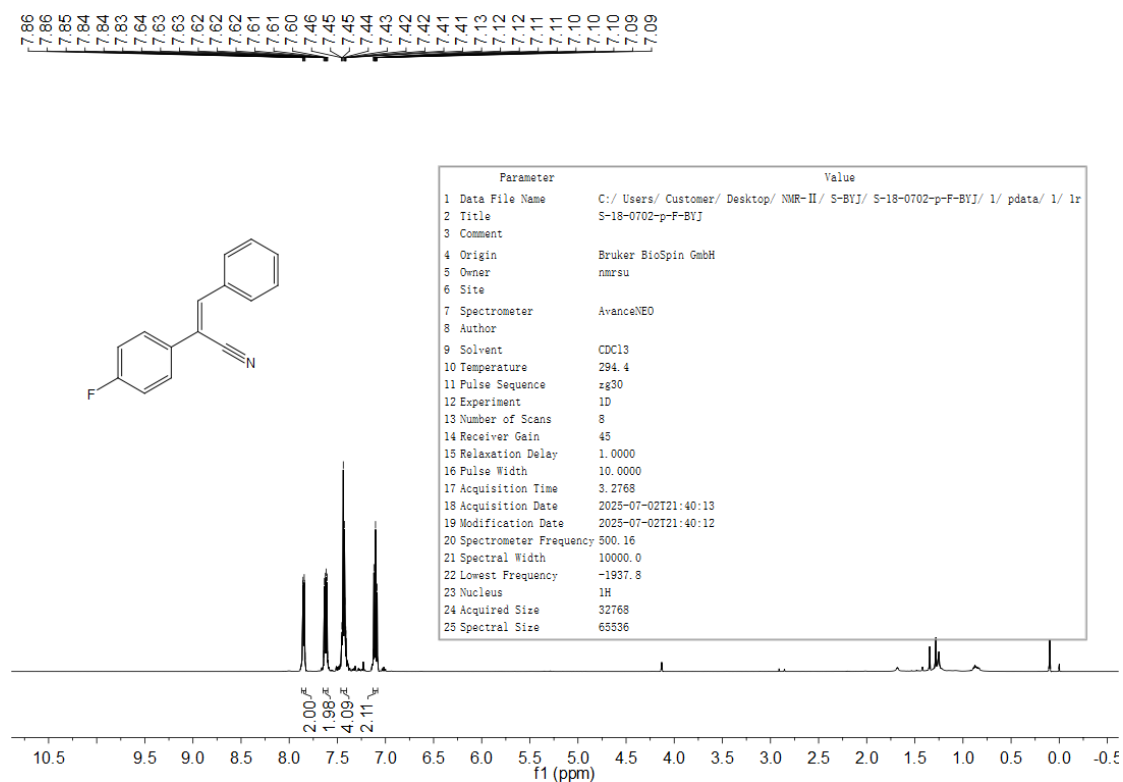



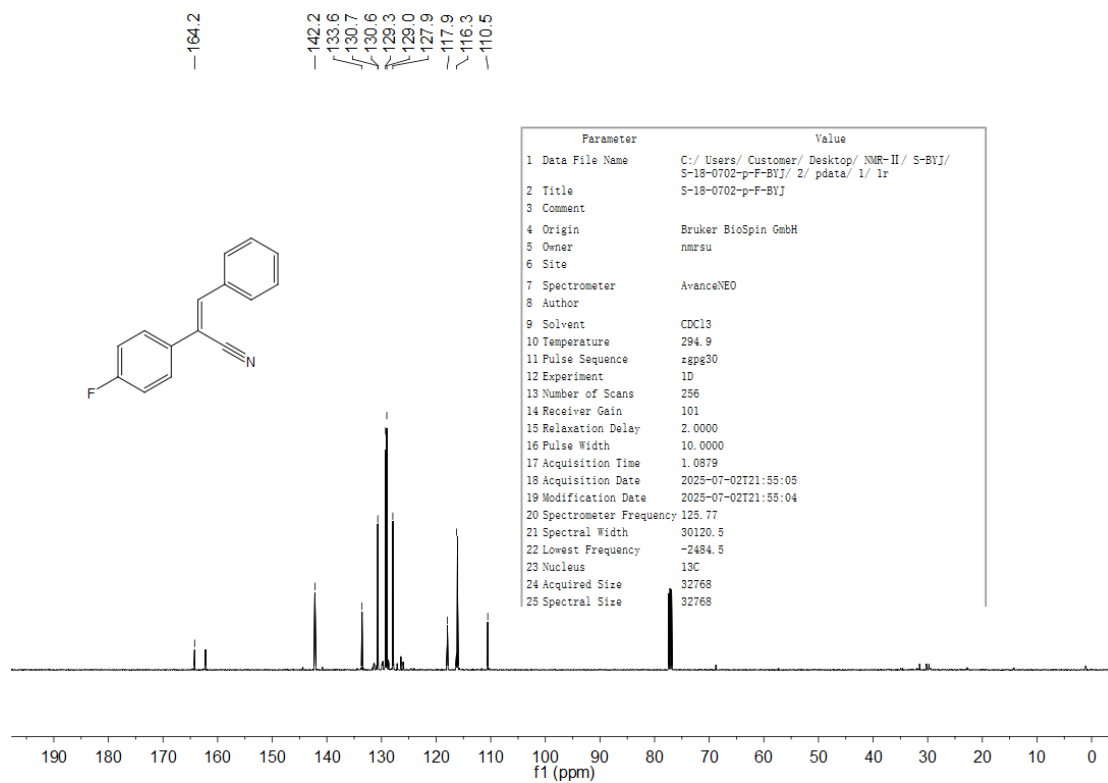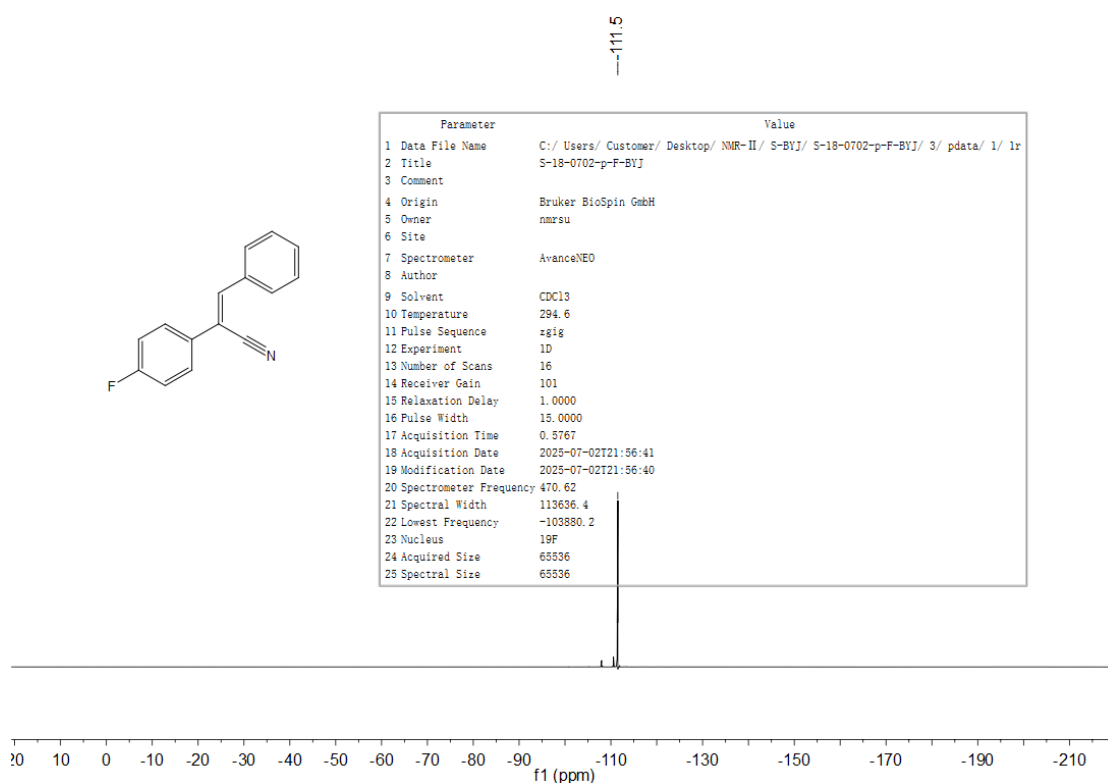

**(Z)-3-phenyl-2-(4-(trifluoromethyl)phenyl)acrylonitrile (3ka)**

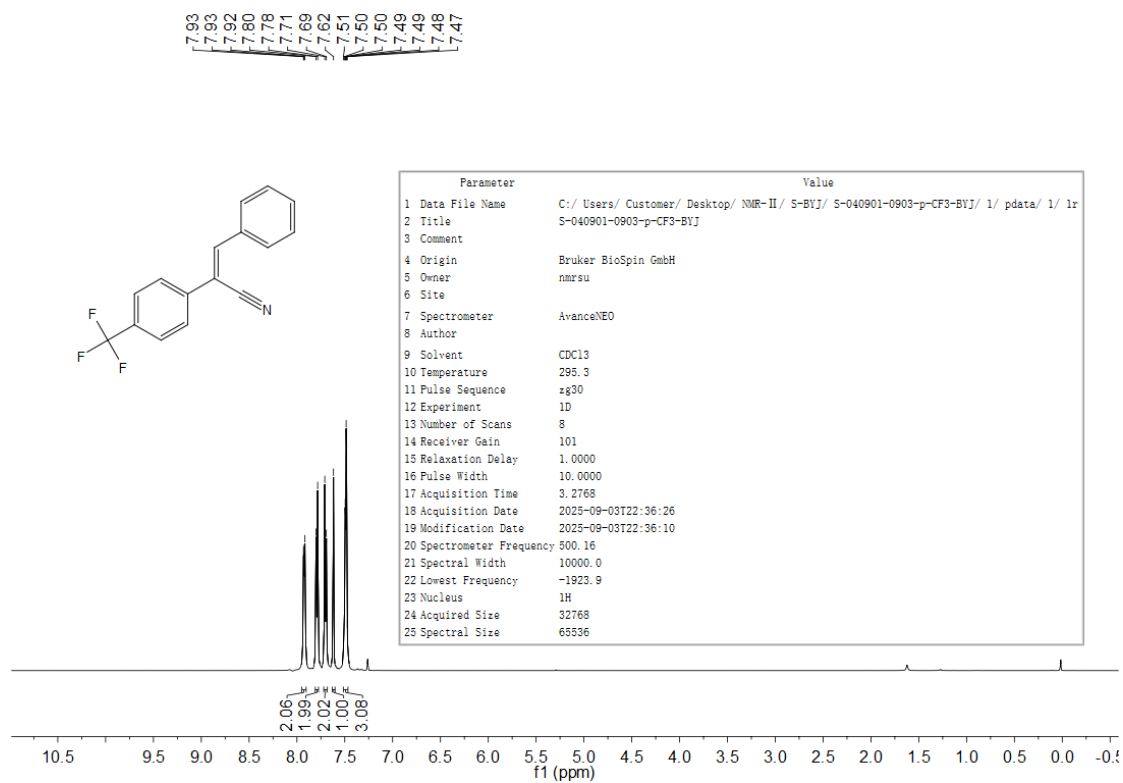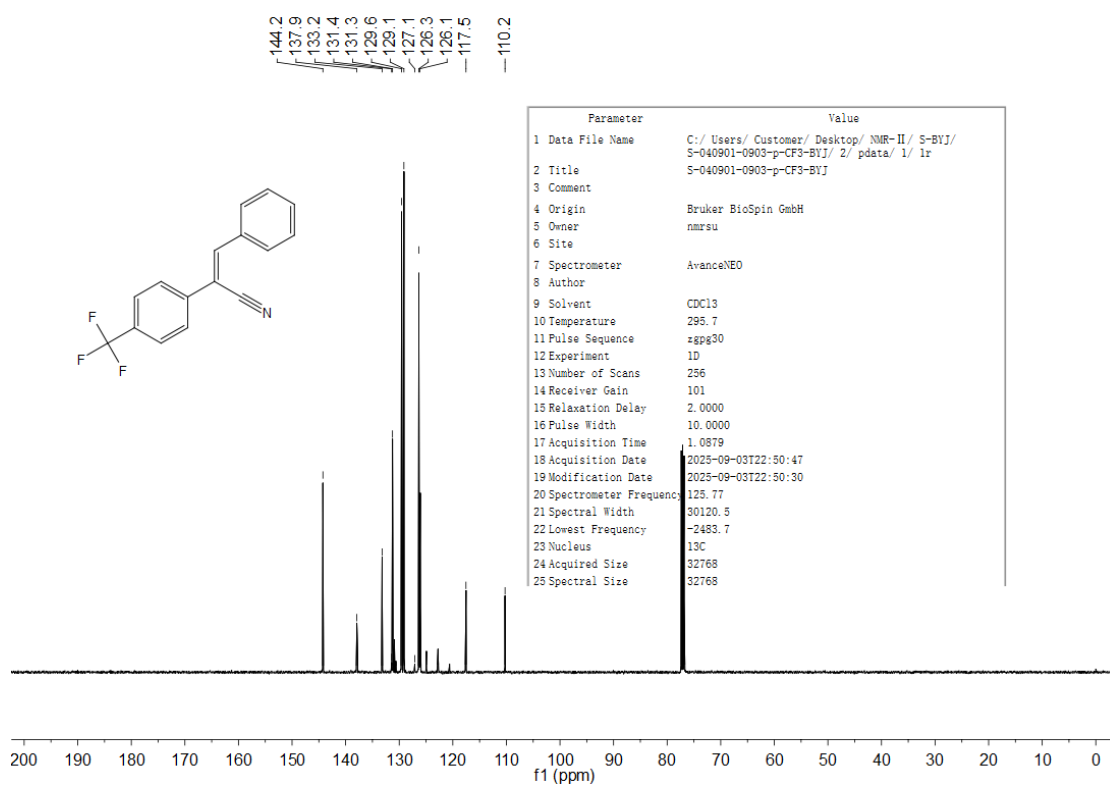

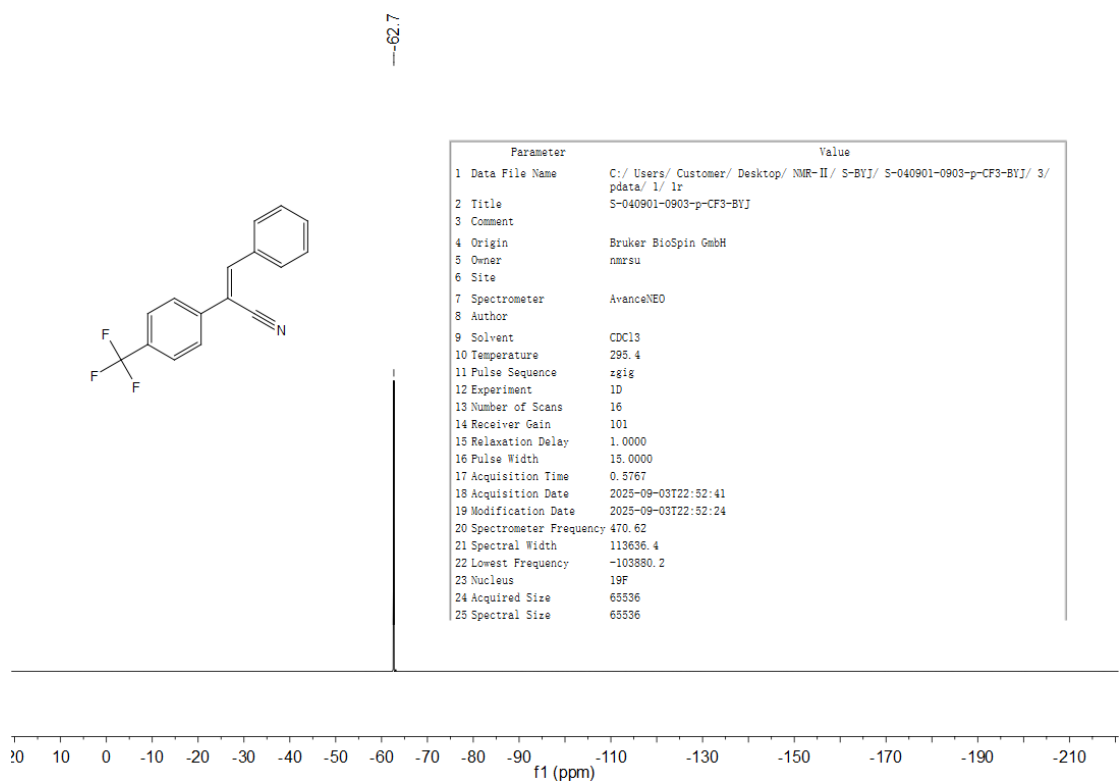

**methyl (Z)-2-cyano-3-phenylacrylate (3la)**

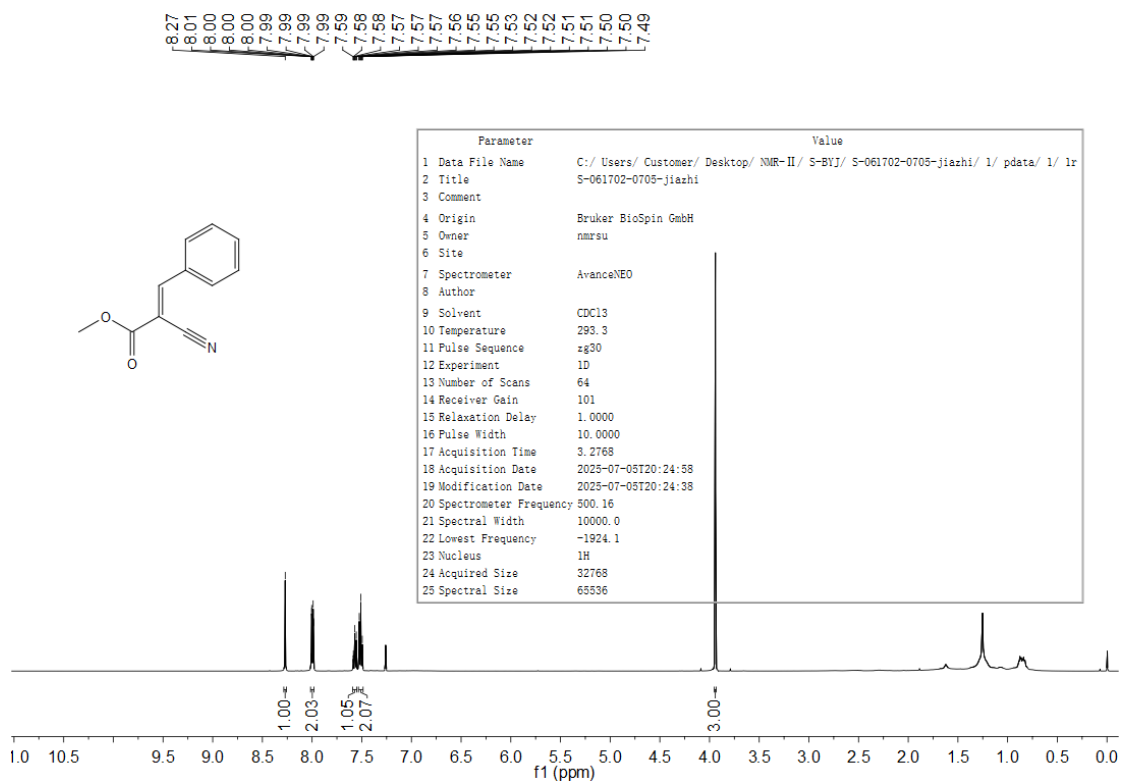

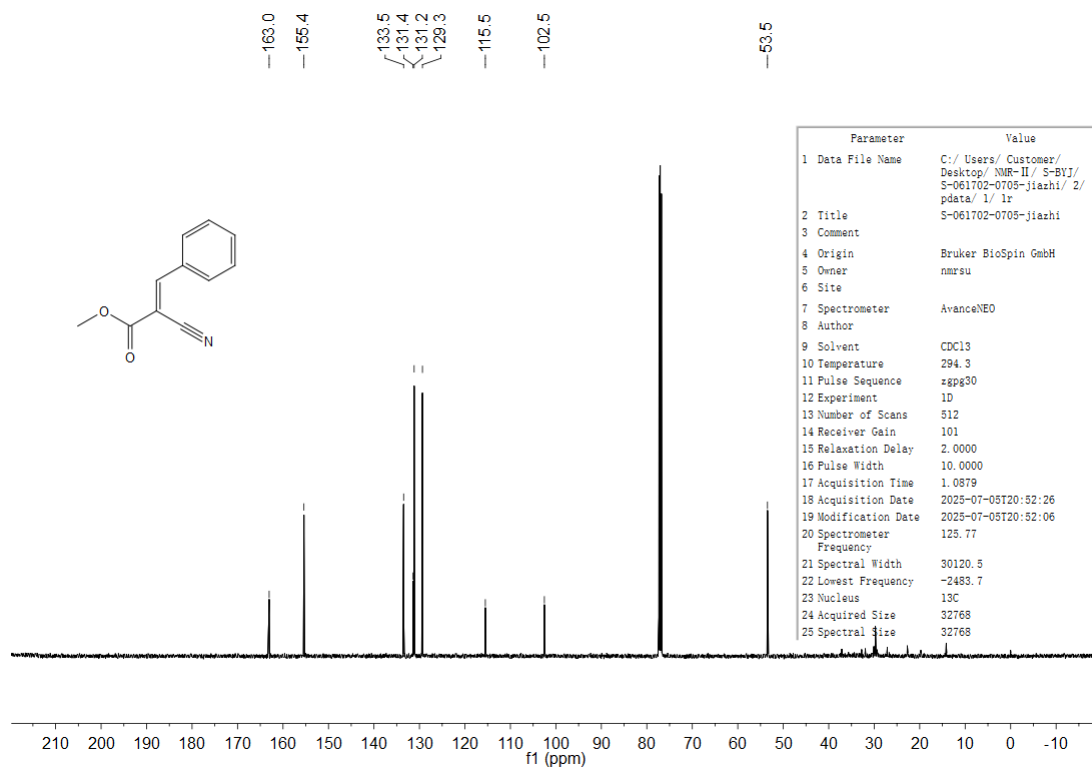

(Z)-2-(4-nitrophenyl)-3-phenylacrylonitrile (3na)

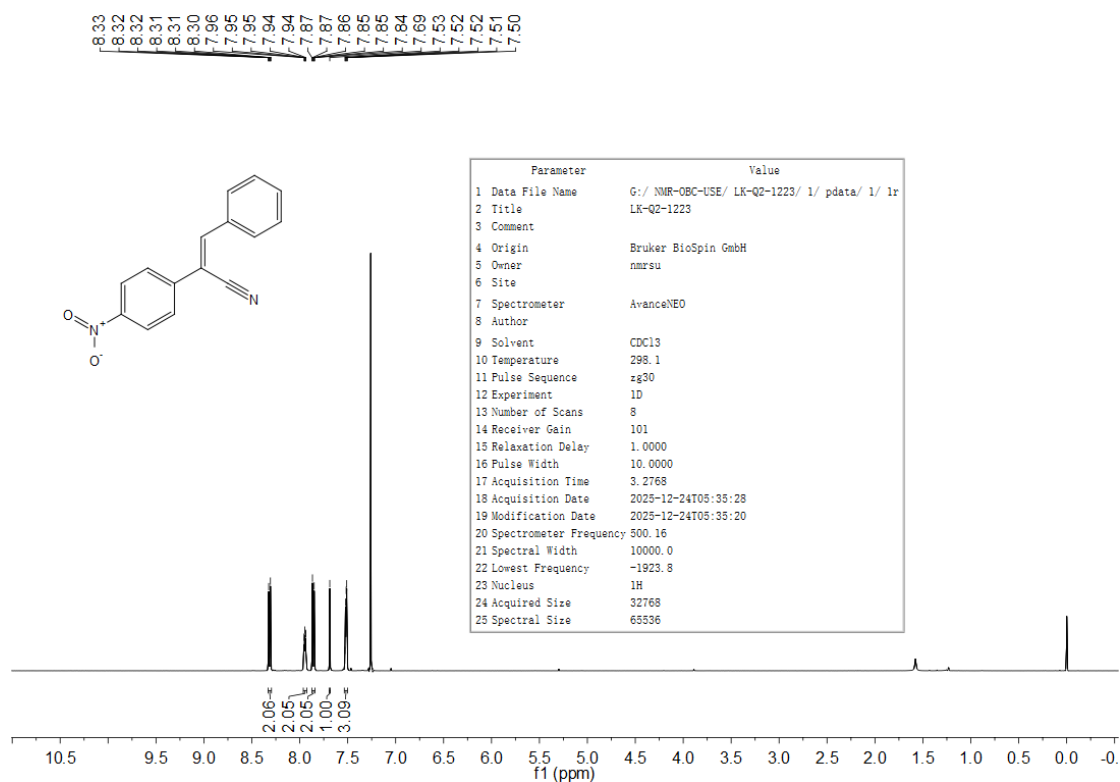

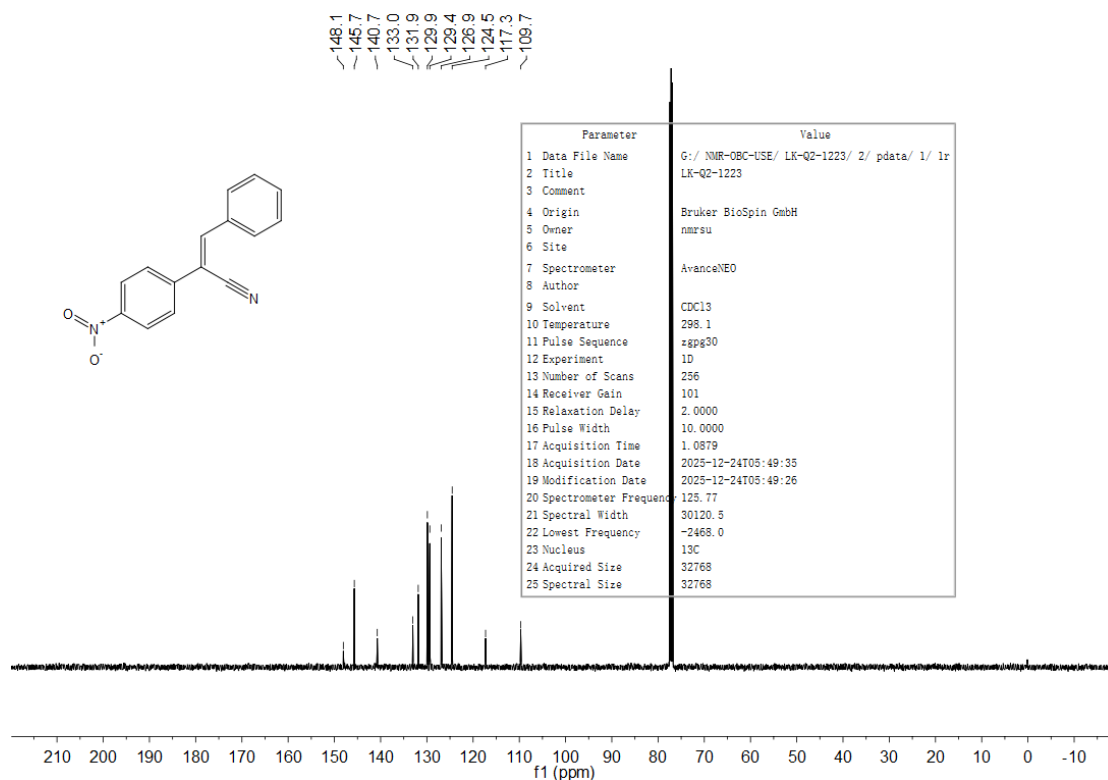

(Z)-2-phenyl-3-(*o*-tolyl)acrylonitrile (3ab)

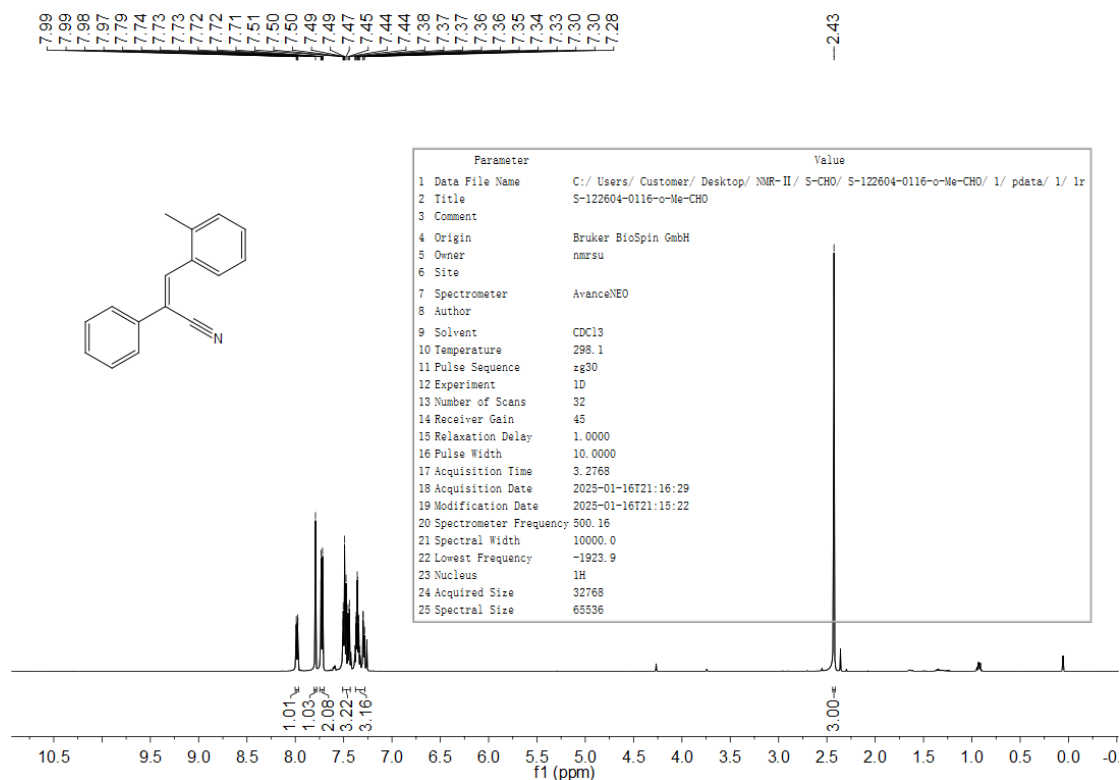

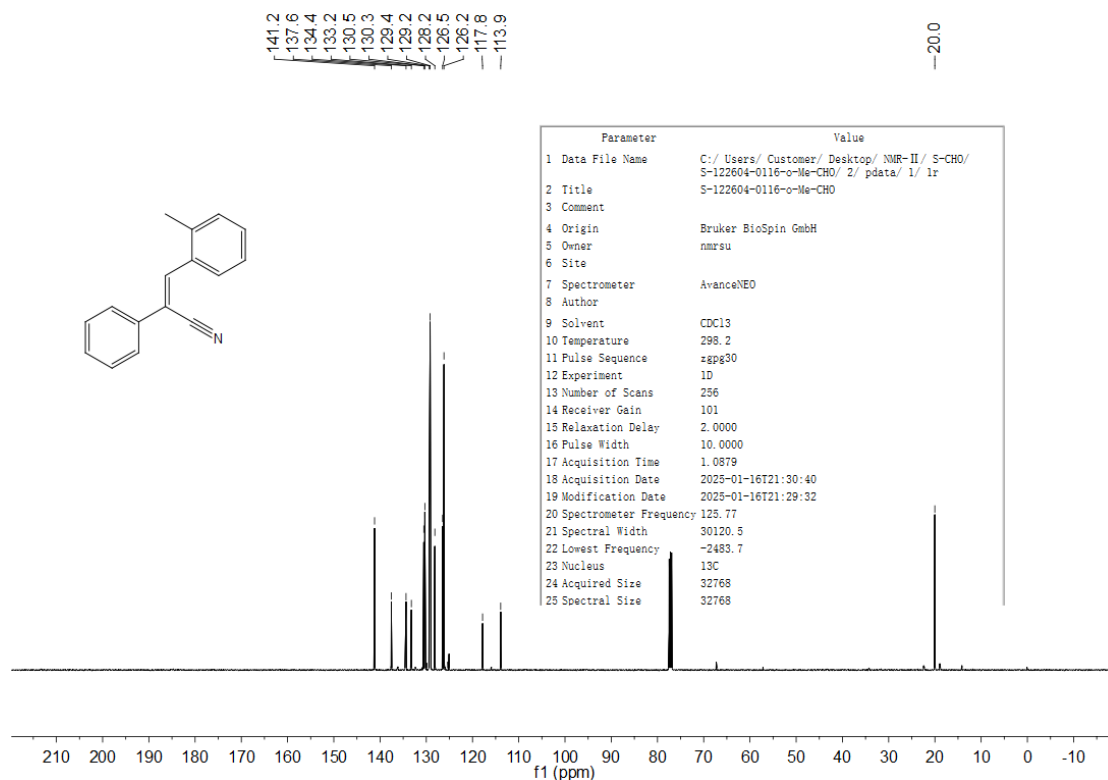

**(Z)-2-phenyl-3-(*m*-tolyl)acrylonitrile (3ac)**

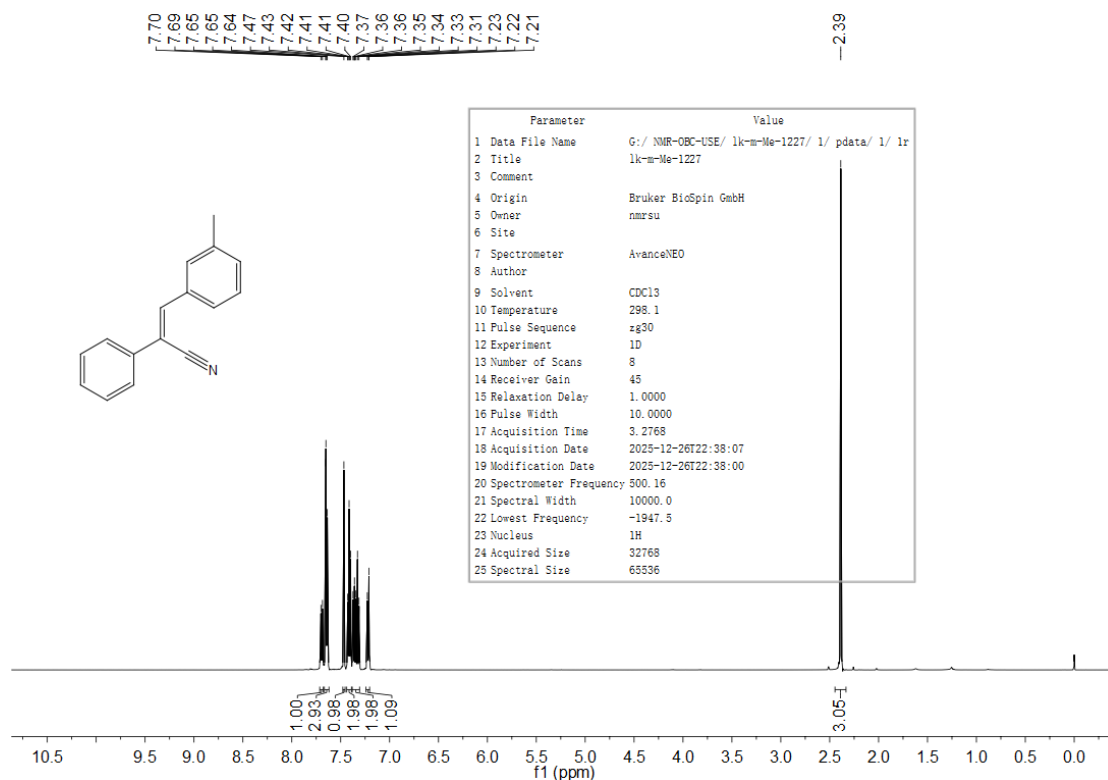

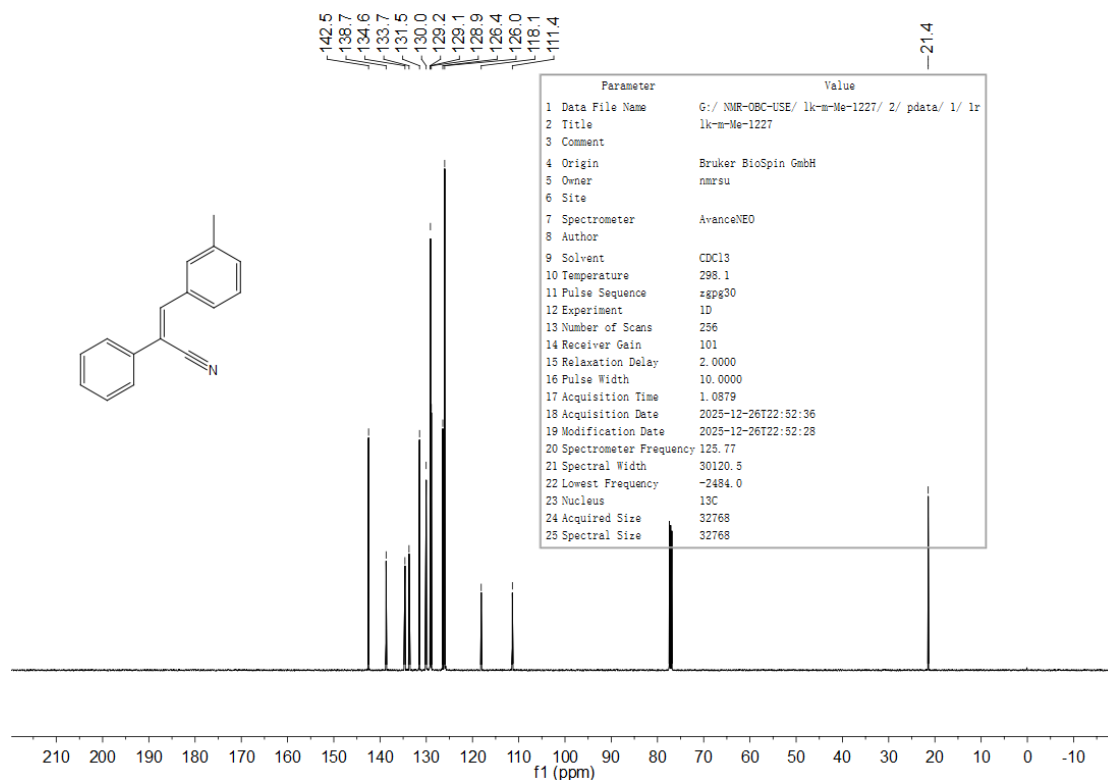

**(Z)-2-phenyl-3-(p-tolyl)acrylonitrile (3ad)**

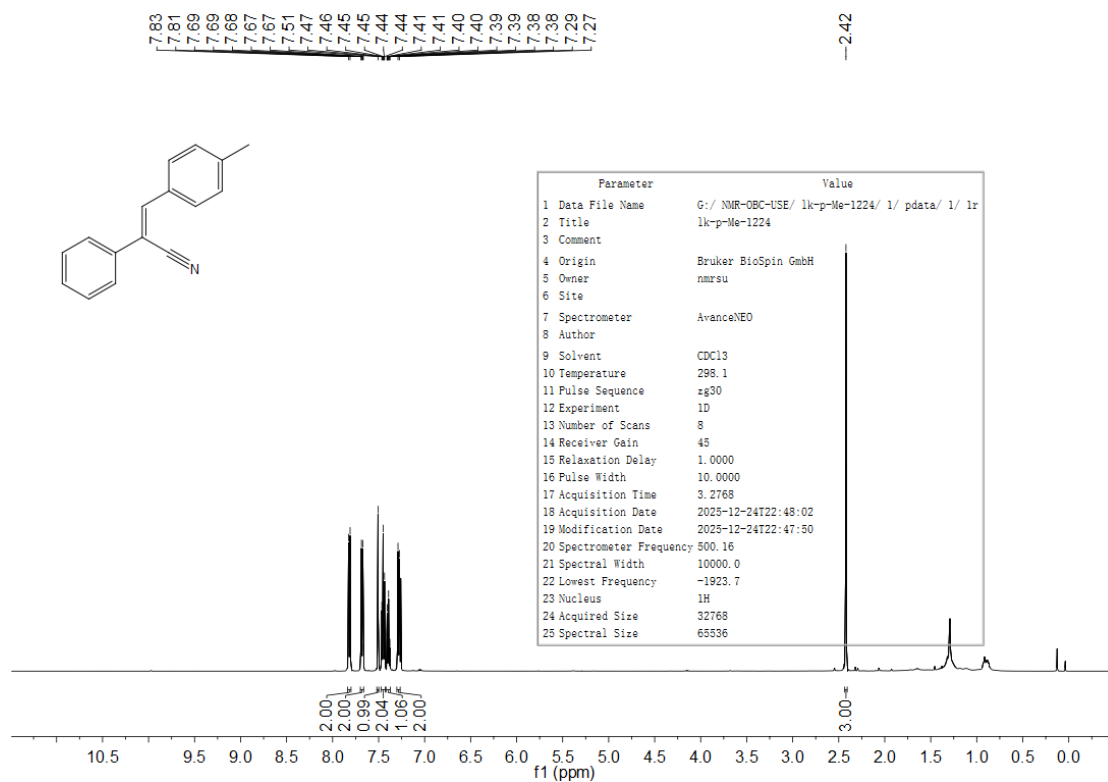

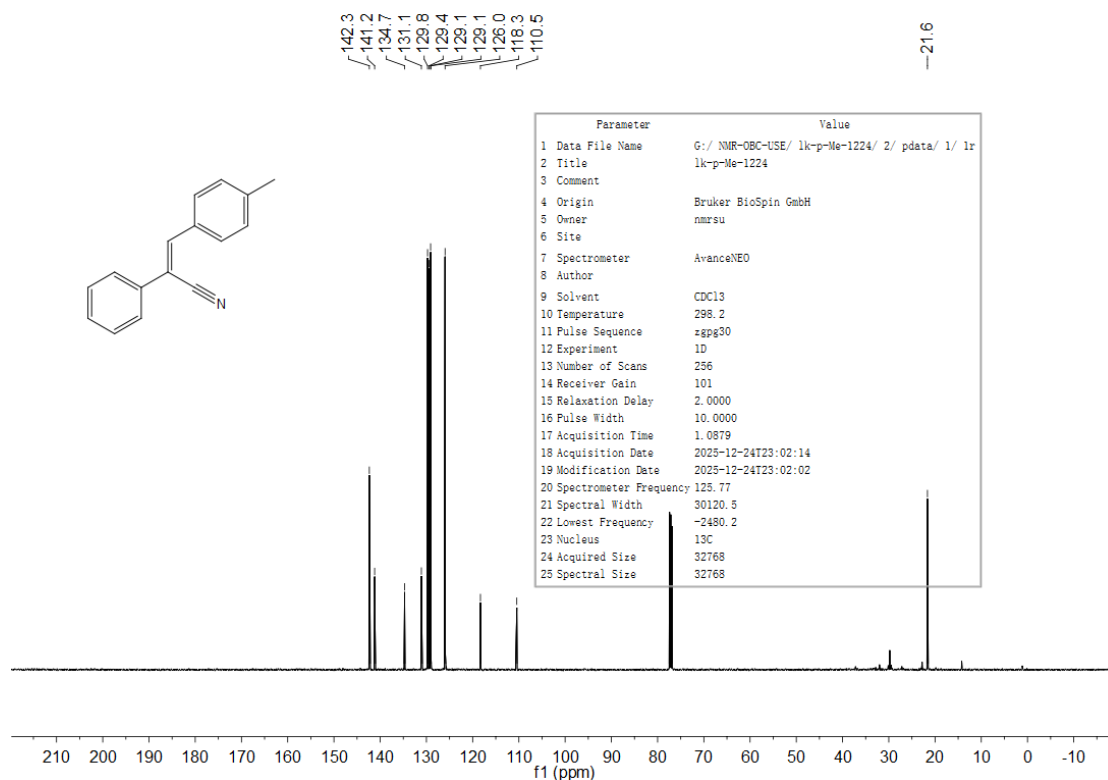

**(Z)-3-(4-(*tert*-butyl)phenyl)-2-phenylacrylonitrile (3ae)**

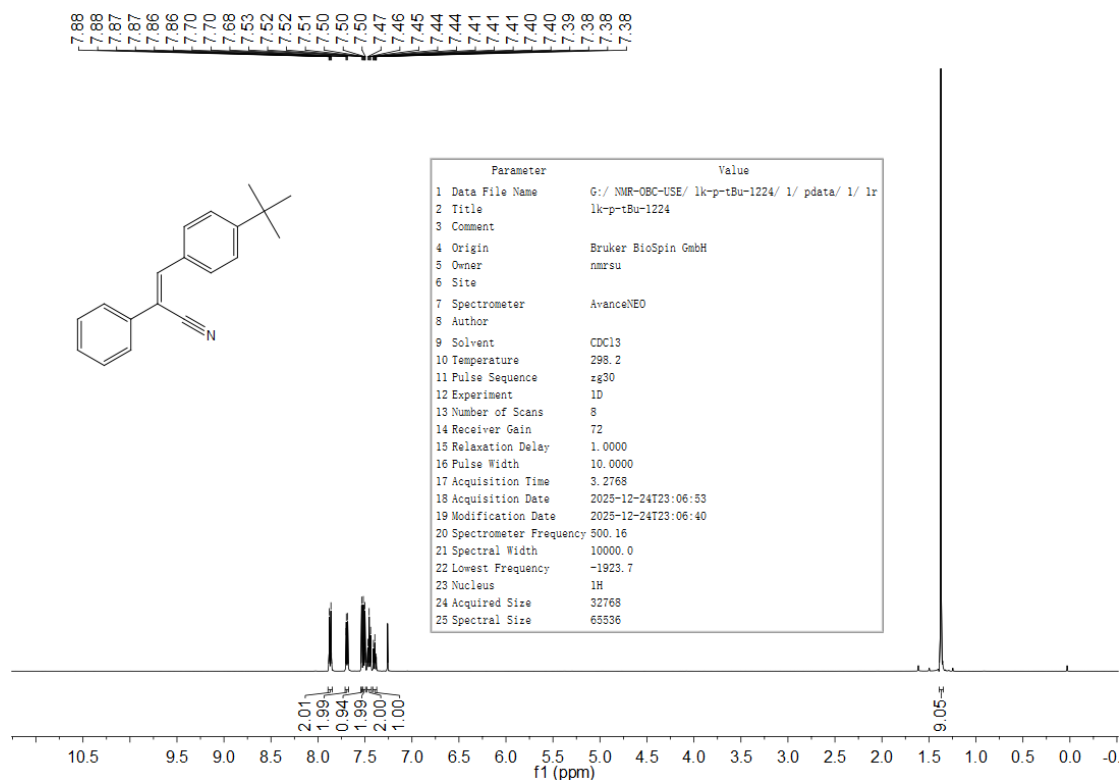



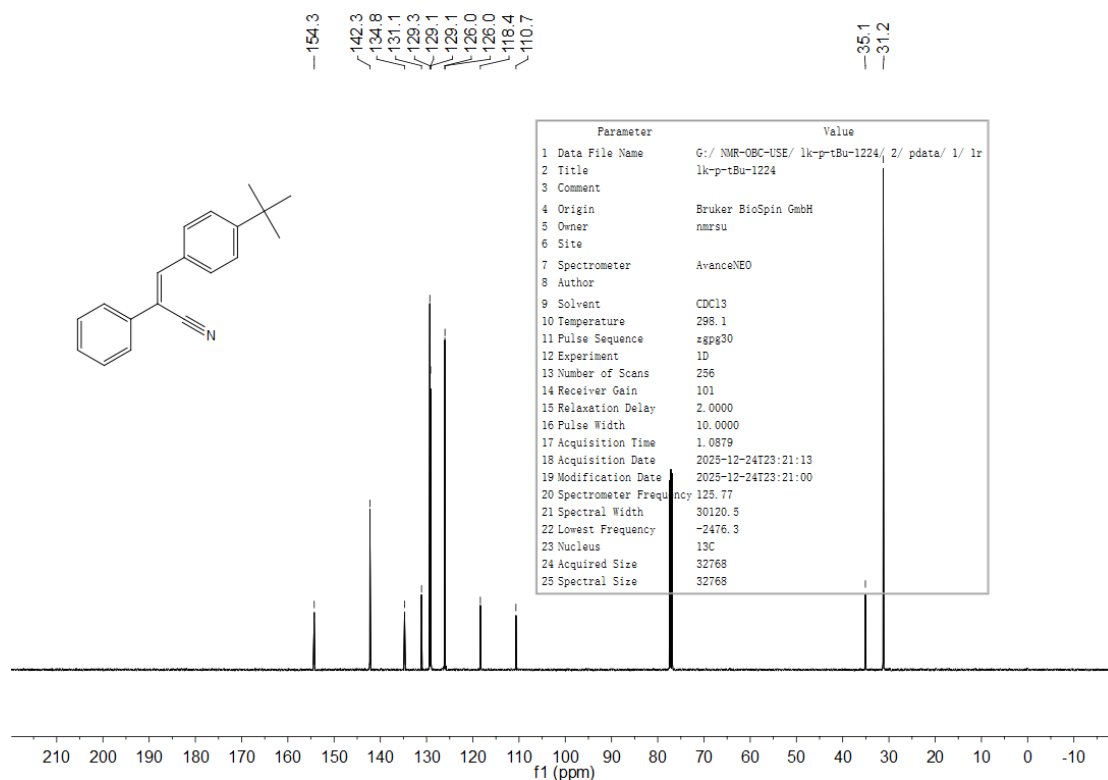

(Z)-3-(3-methoxyphenyl)-2-phenylacrylonitrile (3af)

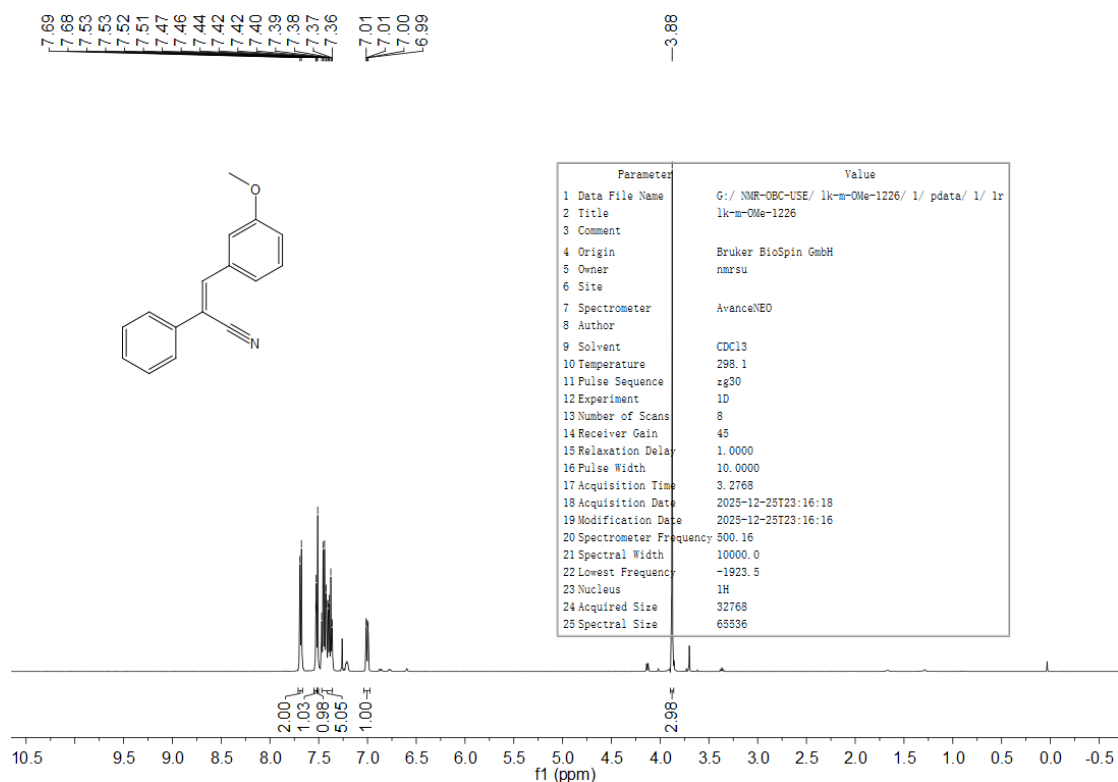

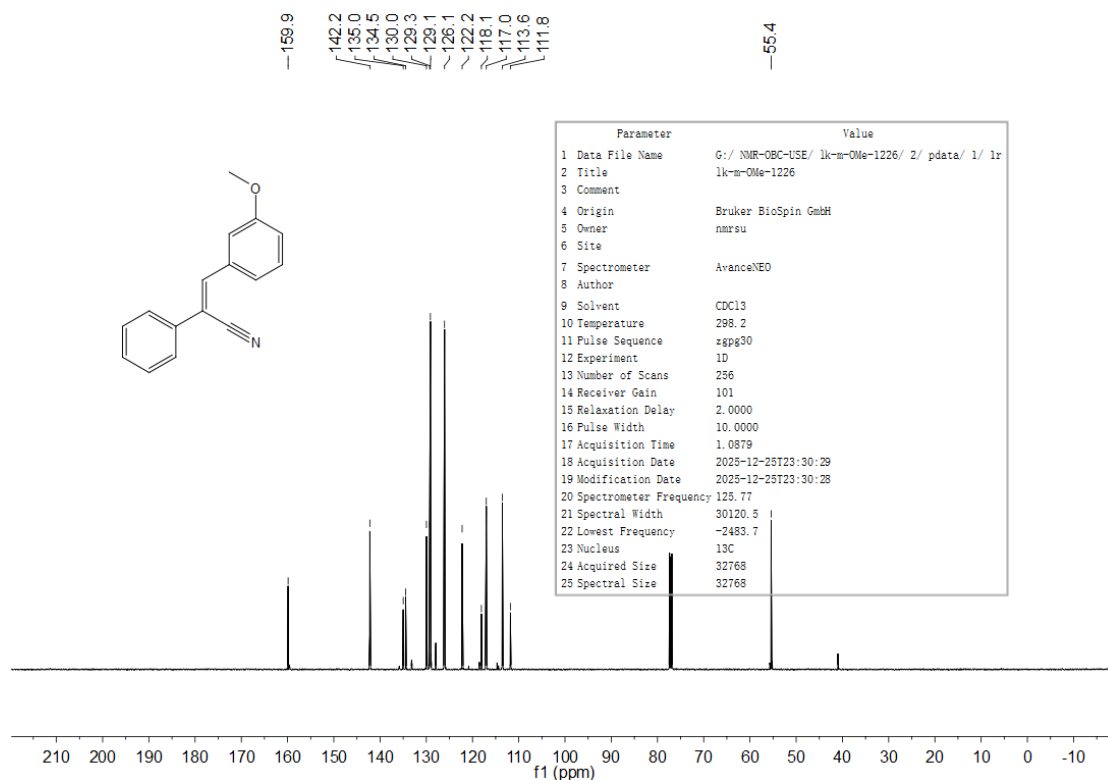

**(Z)-3-(4-methoxyphenyl)-2-phenylacrylonitrile (3ag)**

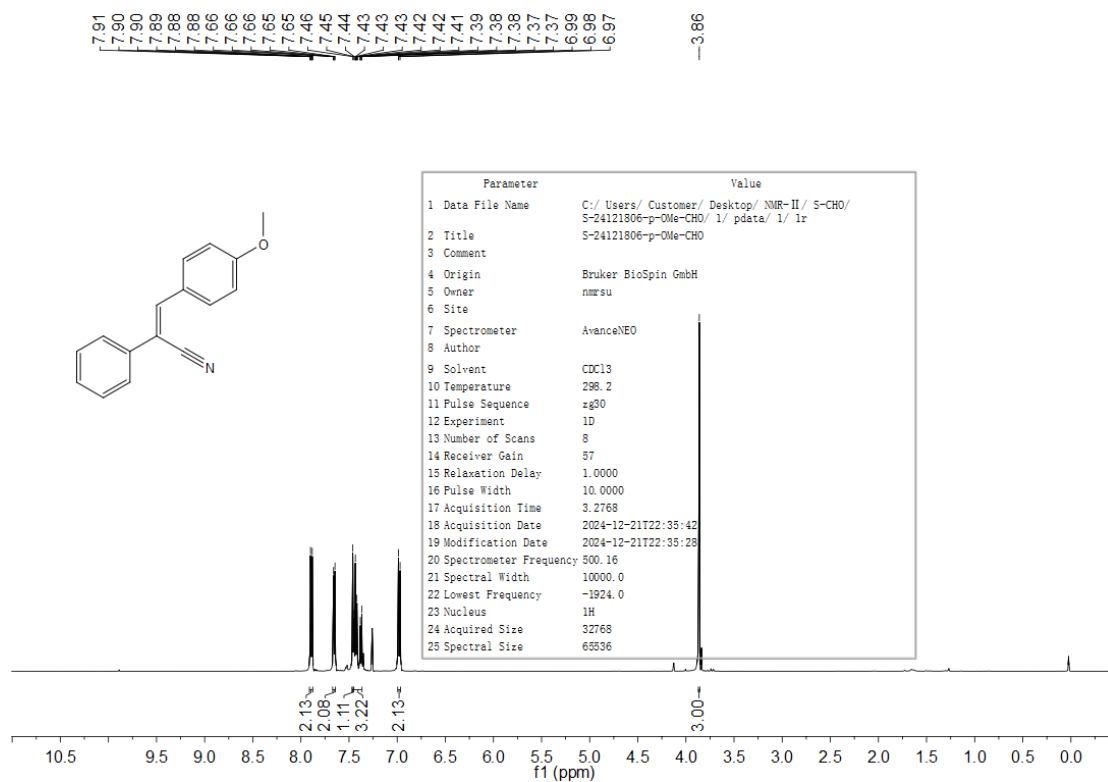

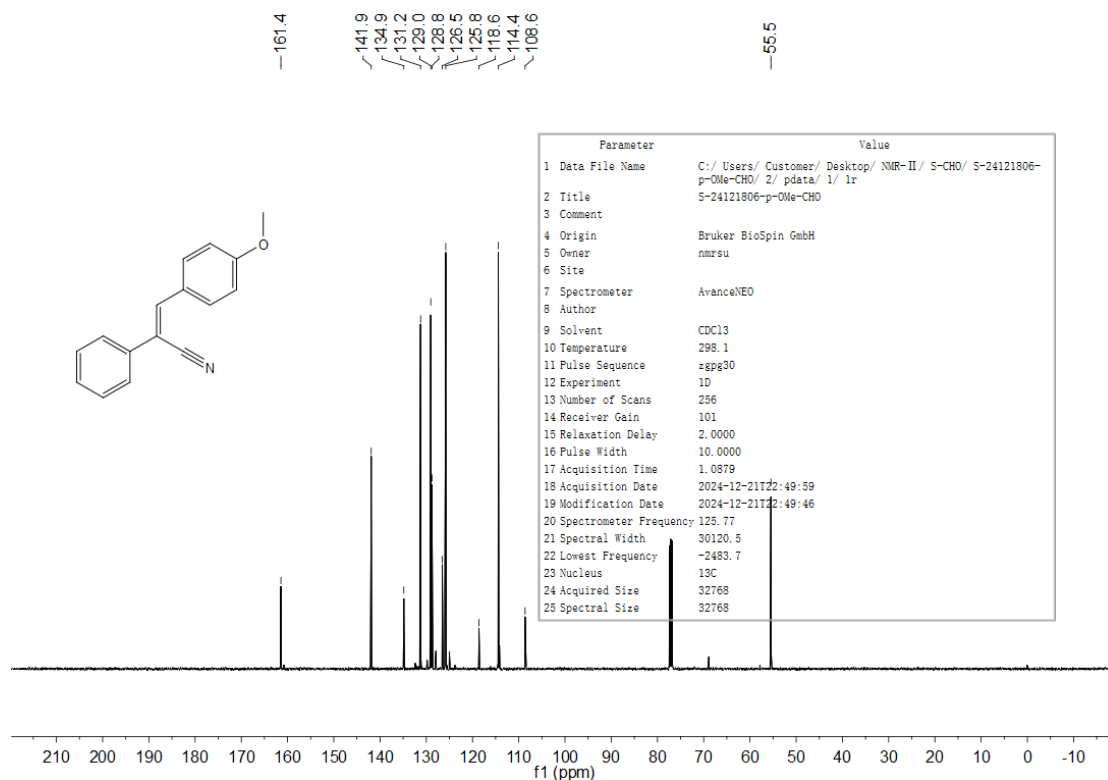

**(Z)-3-(4-bromophenyl)-2-phenylacrylonitrile (3ah)**

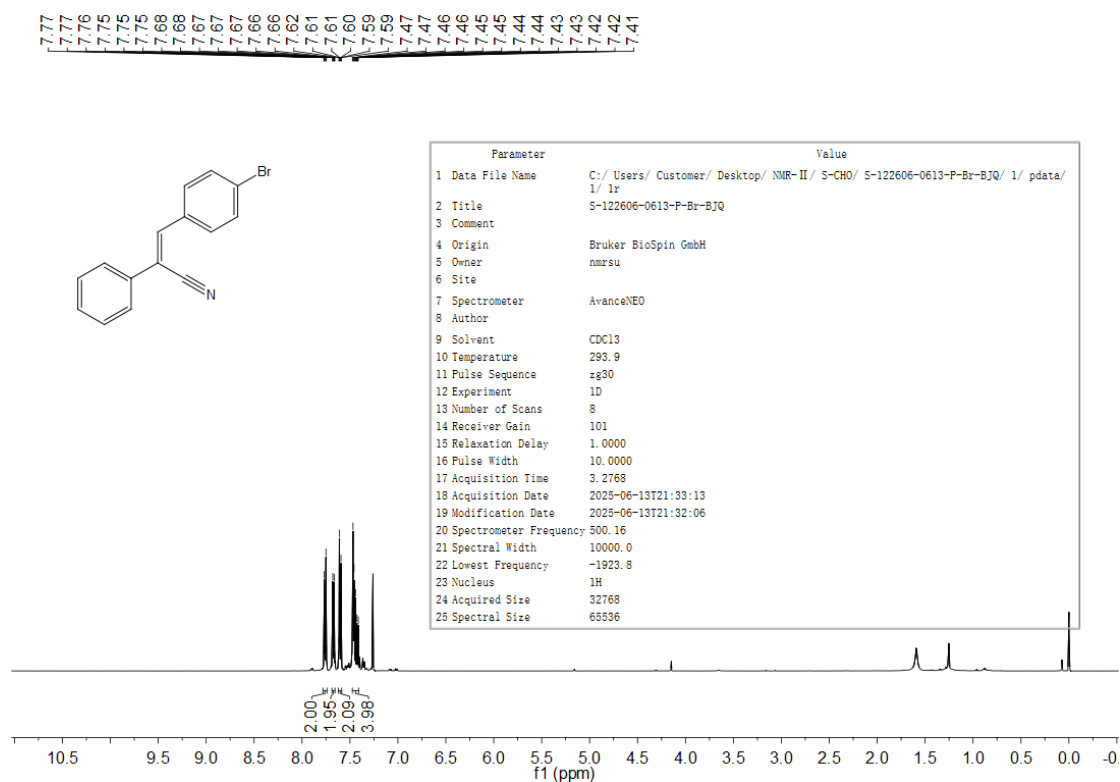

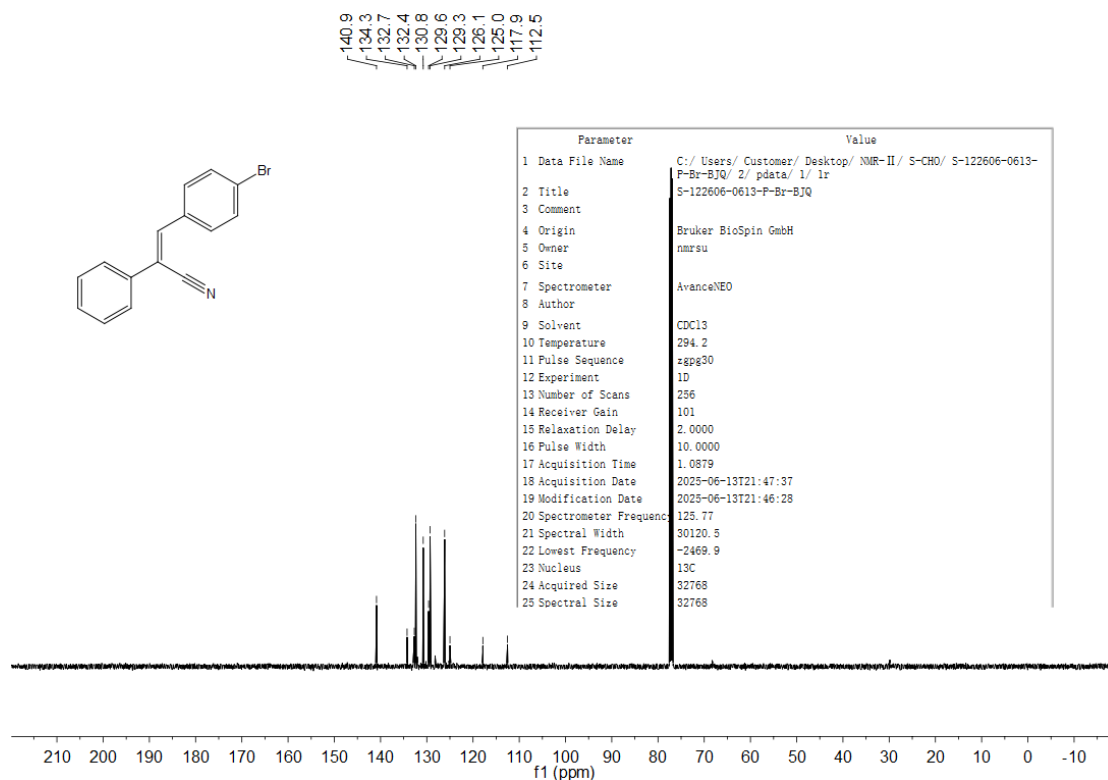

(Z)-3-(2-fluorophenyl)-2-phenylacrylonitrile (3ai)

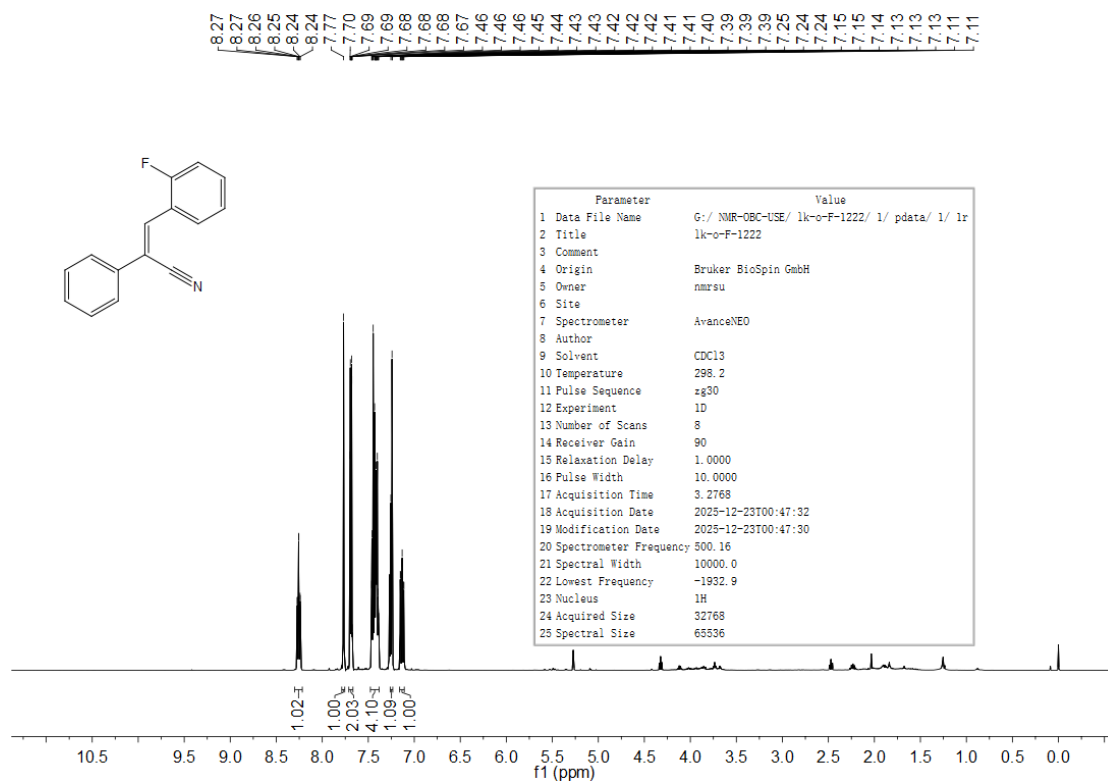

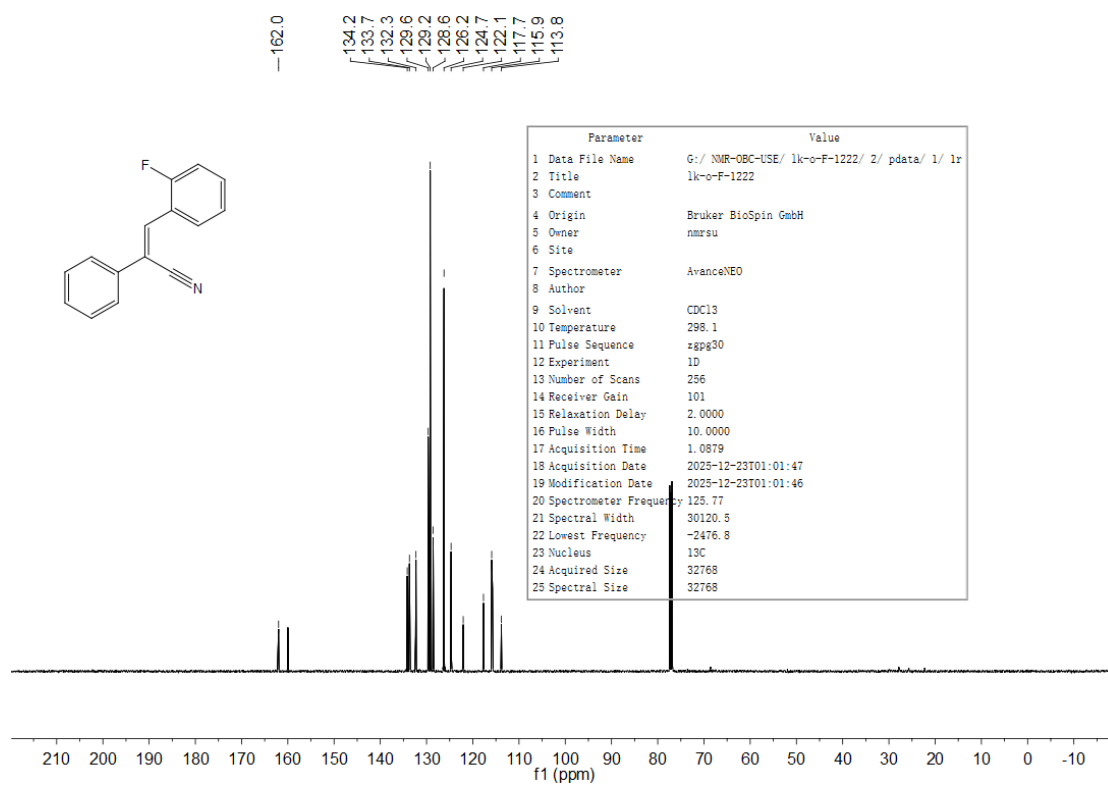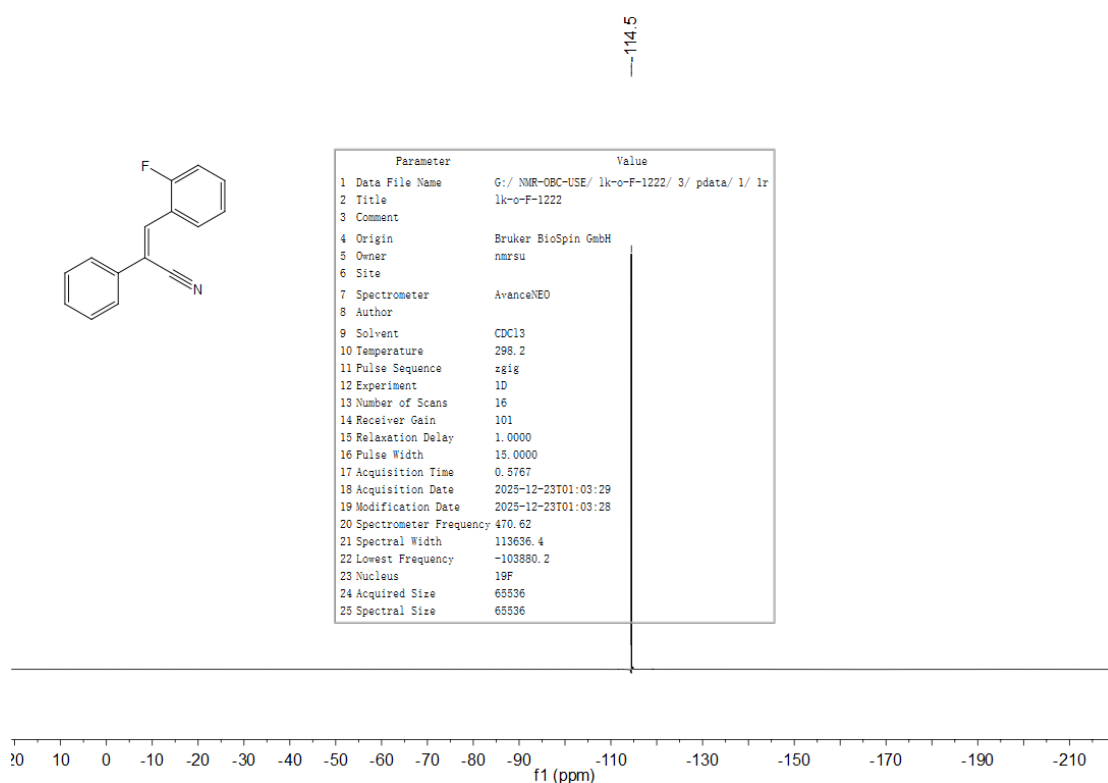

**(Z)-3-(3-fluorophenyl)-2-phenylacrylonitrile (3aj)**

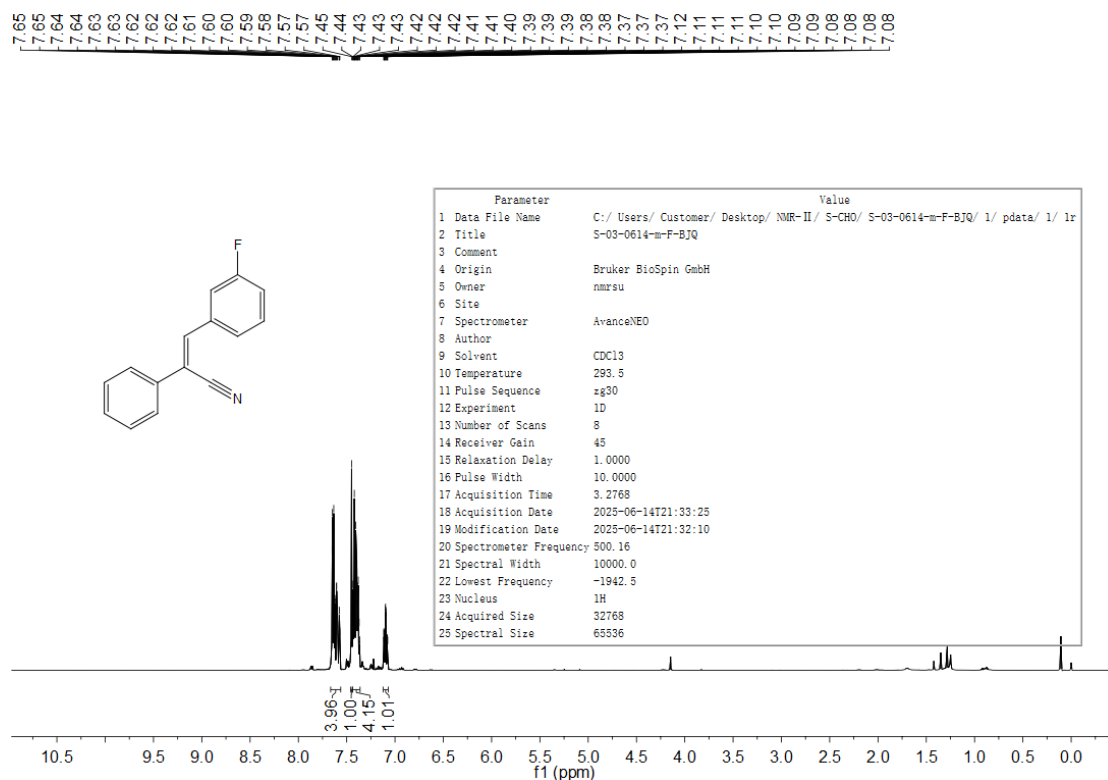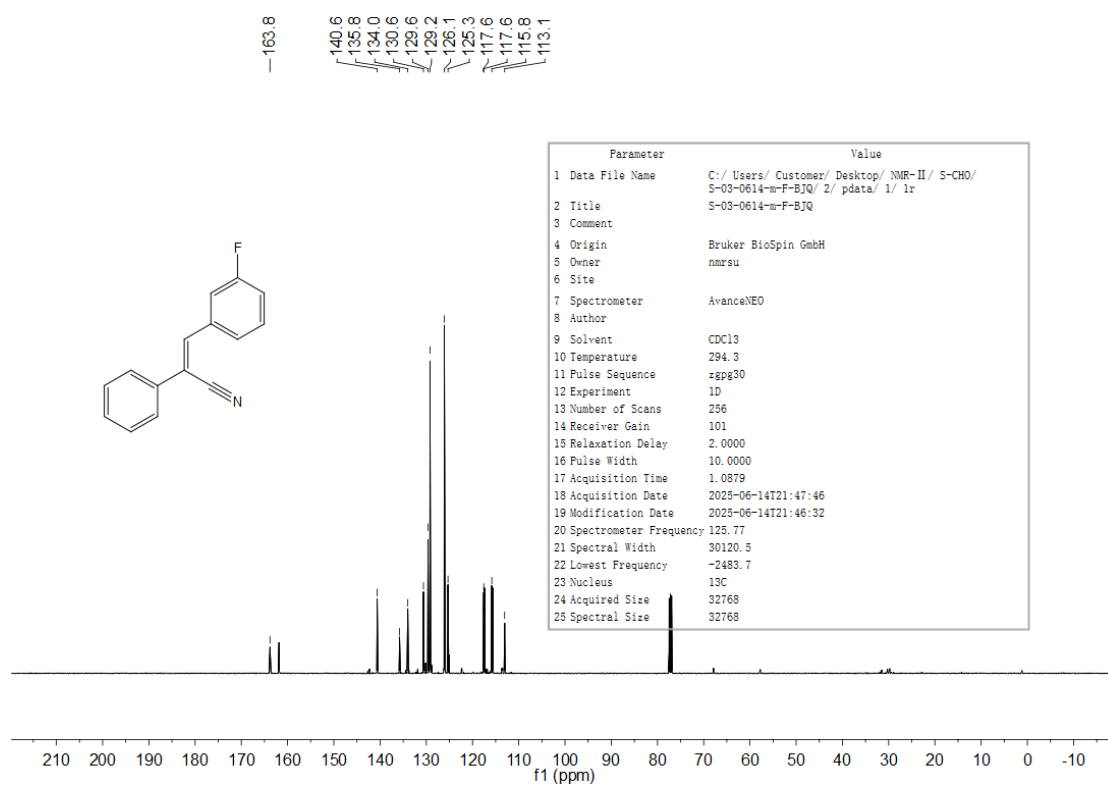

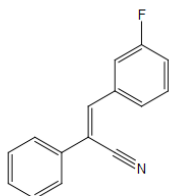

| Parameter                 | Value                                                                 |
|---------------------------|-----------------------------------------------------------------------|
| 1 Data File Name          | C:/Users/Customer/Desktop/NMR-II/S-CHO/S-03-0614-m-F-BJQ/3/pdata/1/1r |
| 2 Title                   | S-03-0614-m-F-BJQ                                                     |
| 3 Comment                 |                                                                       |
| 4 Origin                  | Bruker BioSpin GmbH                                                   |
| 5 Owner                   | nmrsu                                                                 |
| 6 Site                    |                                                                       |
| 7 Spectrometer            | AvanceNEO                                                             |
| 8 Author                  |                                                                       |
| 9 Solvent                 | CDCl <sub>3</sub>                                                     |
| 10 Temperature            | 294.0                                                                 |
| 11 Pulse Sequence         | zgig                                                                  |
| 12 Experiment             | 1D                                                                    |
| 13 Number of Scans        | 16                                                                    |
| 14 Receiver Gain          | 101                                                                   |
| 15 Relaxation Delay       | 1.0000                                                                |
| 16 Pulse Width            | 15.0000                                                               |
| 17 Acquisition Time       | 0.5767                                                                |
| 18 Acquisition Date       | 2025-06-14T21:49:31                                                   |
| 19 Modification Date      | 2025-06-14T21:48:16                                                   |
| 20 Spectrometer Frequency | 470.62                                                                |
| 21 Spectral Width         | 113636.4                                                              |
| 22 Lowest Frequency       | -103880.2                                                             |
| 23 Nucleus                | 19F                                                                   |
| 24 Acquired Size          | 65536                                                                 |
| 25 Spectral Size          | 65536                                                                 |

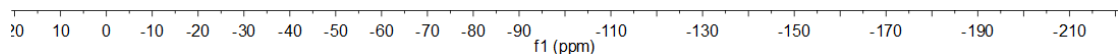

**(Z)-3-(4-fluorophenyl)-2-phenylacrylonitrile (3ak)**

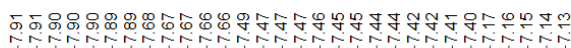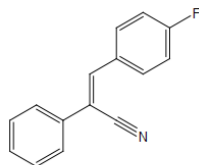

| Parameter                 | Value                                                                |
|---------------------------|----------------------------------------------------------------------|
| 1 Data File Name          | C:/Users/Customer/Desktop/NMR-II/S-CHO/S-4-0702-p-F-BJQ/1/pdata/1/1r |
| 2 Title                   | S-4-0702-p-F-BJQ                                                     |
| 3 Comment                 |                                                                      |
| 4 Origin                  | Bruker BioSpin GmbH                                                  |
| 5 Owner                   | nmrsu                                                                |
| 6 Site                    |                                                                      |
| 7 Spectrometer            | AvanceNEO                                                            |
| 8 Author                  |                                                                      |
| 9 Solvent                 | CDCl <sub>3</sub>                                                    |
| 10 Temperature            | 294.5                                                                |
| 11 Pulse Sequence         | zg30                                                                 |
| 12 Experiment             | 1D                                                                   |
| 13 Number of Scans        | 8                                                                    |
| 14 Receiver Gain          | 72                                                                   |
| 15 Relaxation Delay       | 1.0000                                                               |
| 16 Pulse Width            | 10.0000                                                              |
| 17 Acquisition Time       | 3.2768                                                               |
| 18 Acquisition Date       | 2025-07-02T20:39:11                                                  |
| 19 Modification Date      | 2025-07-02T20:39:10                                                  |
| 20 Spectrometer Frequency | 500.16                                                               |
| 21 Spectral Width         | 10000.0                                                              |
| 22 Lowest Frequency       | -1923.7                                                              |
| 23 Nucleus                | 1H                                                                   |
| 24 Acquired Size          | 32768                                                                |
| 25 Spectral Size          | 65536                                                                |

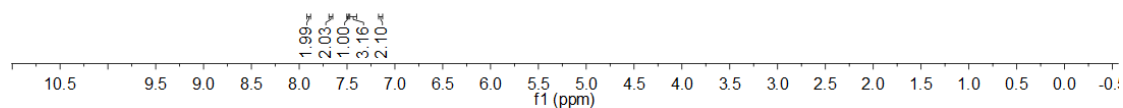

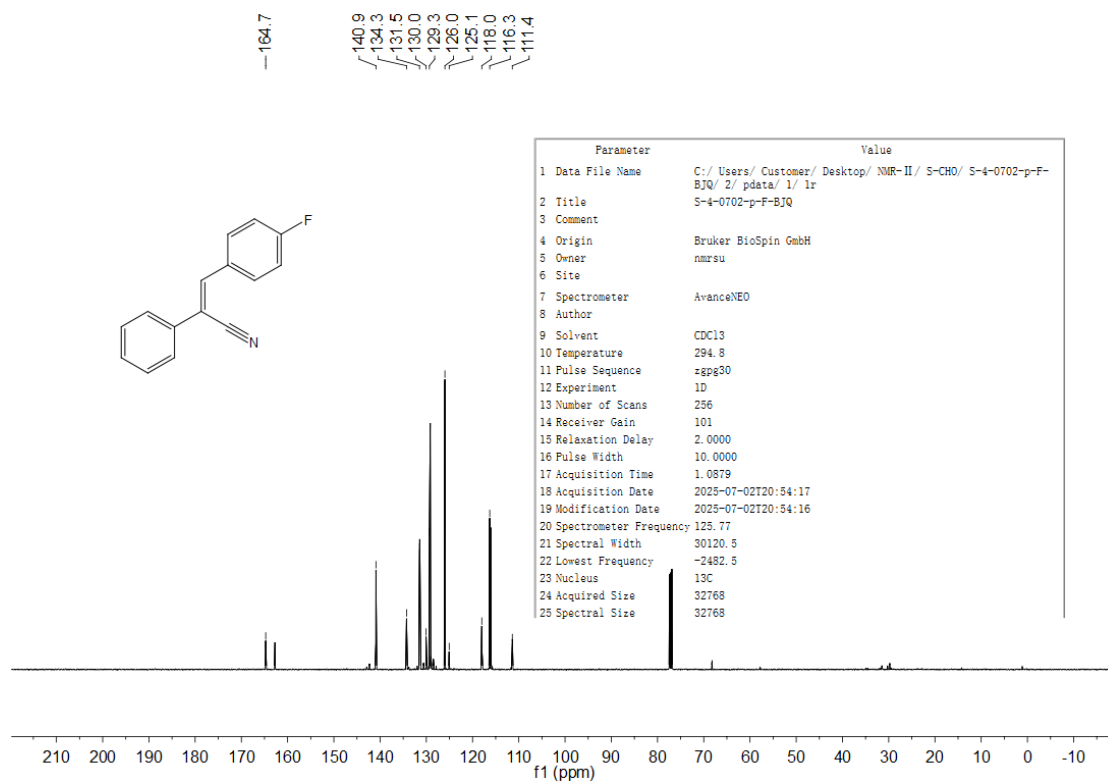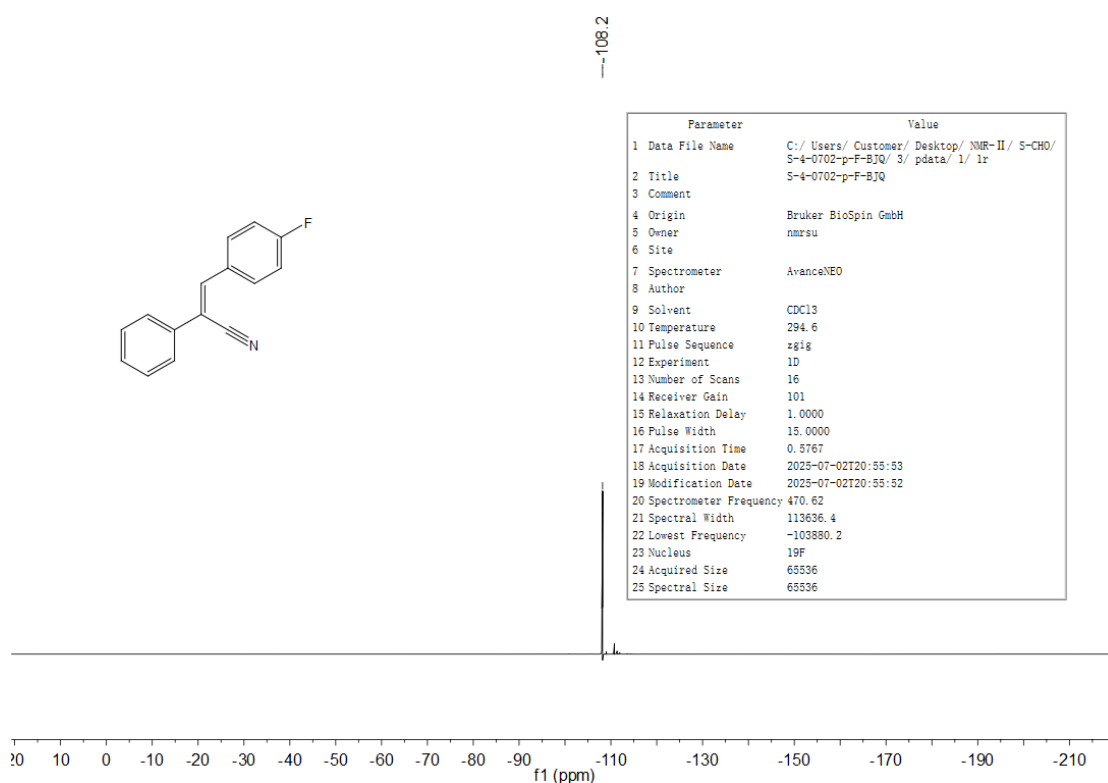

**(Z)-2-phenyl-3-(4-(trifluoromethyl)phenyl)acrylonitrile (3a)**



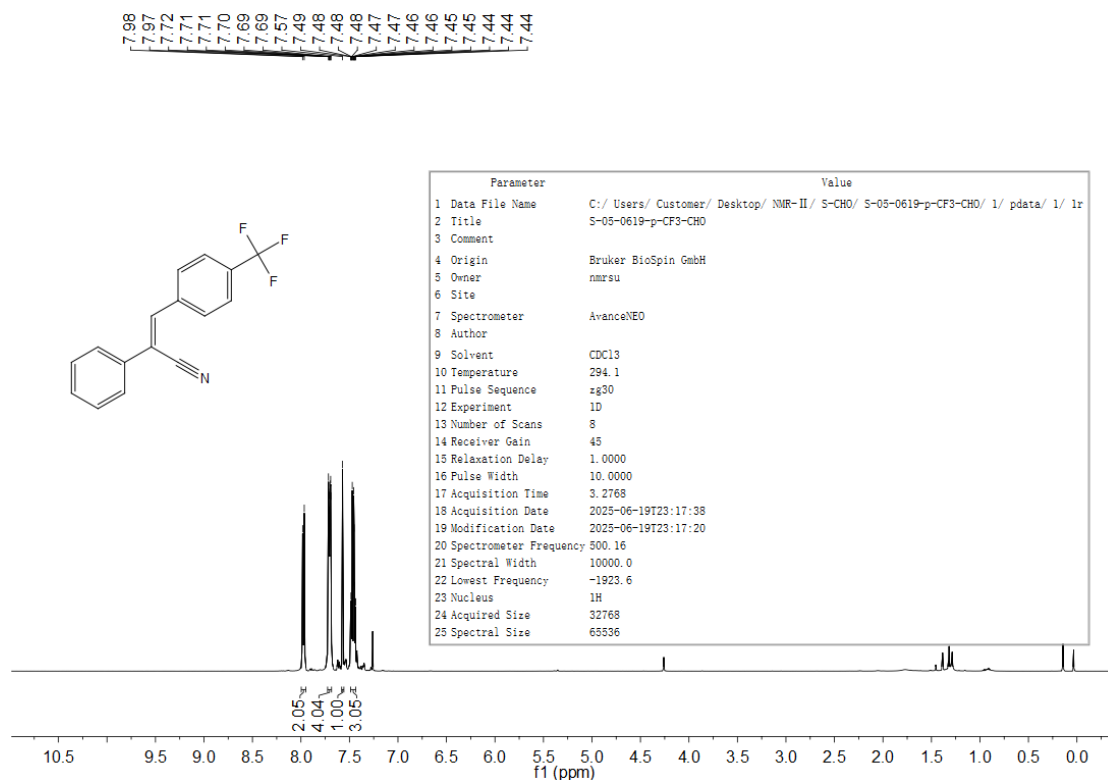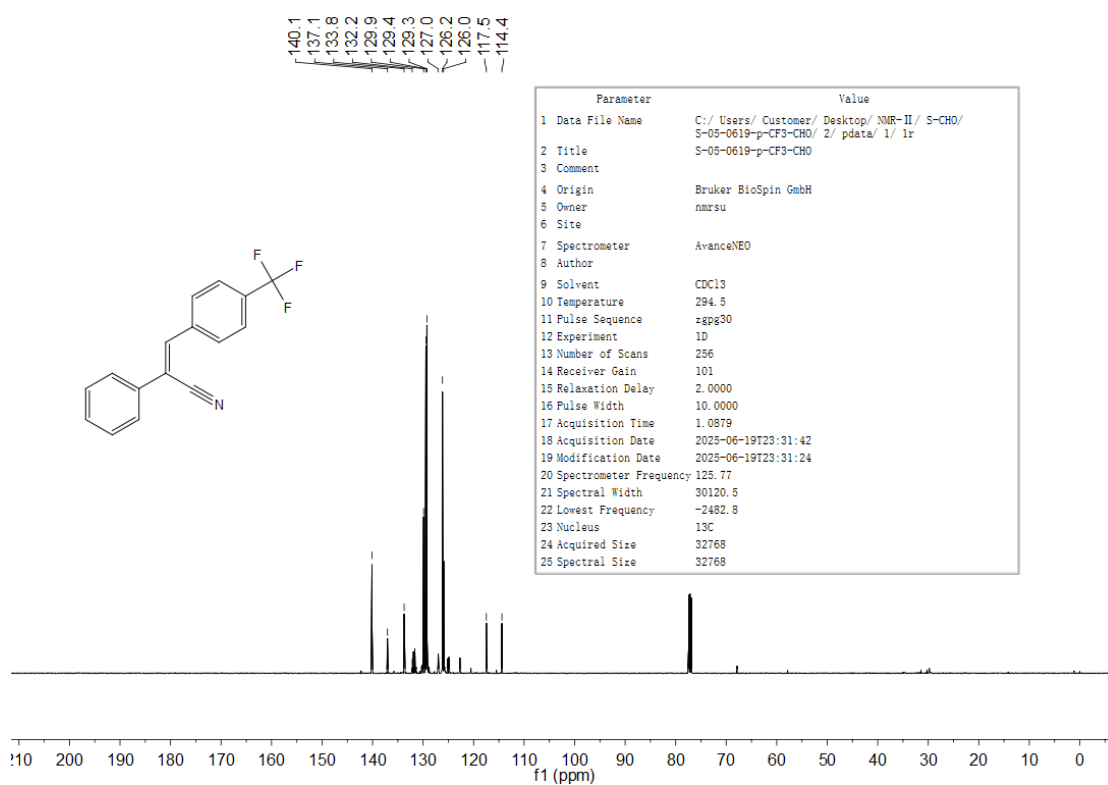

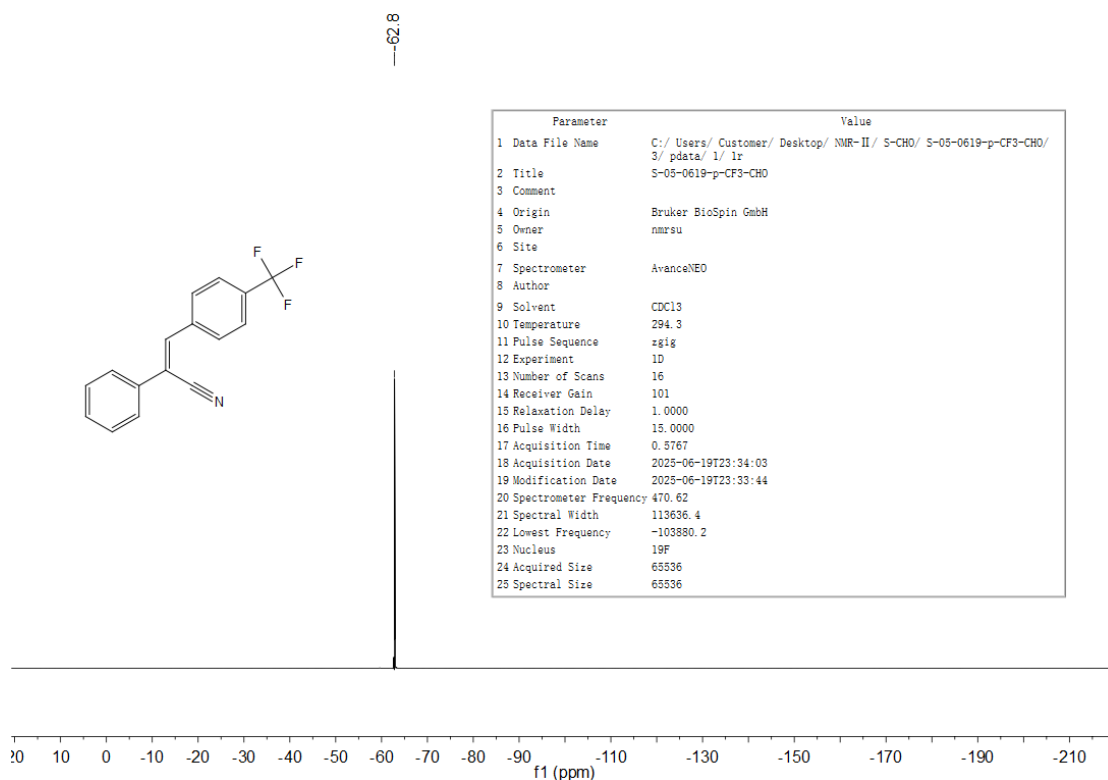

**(Z)-3-(4-nitrophenyl)-2-phenylacrylonitrile (3am)**

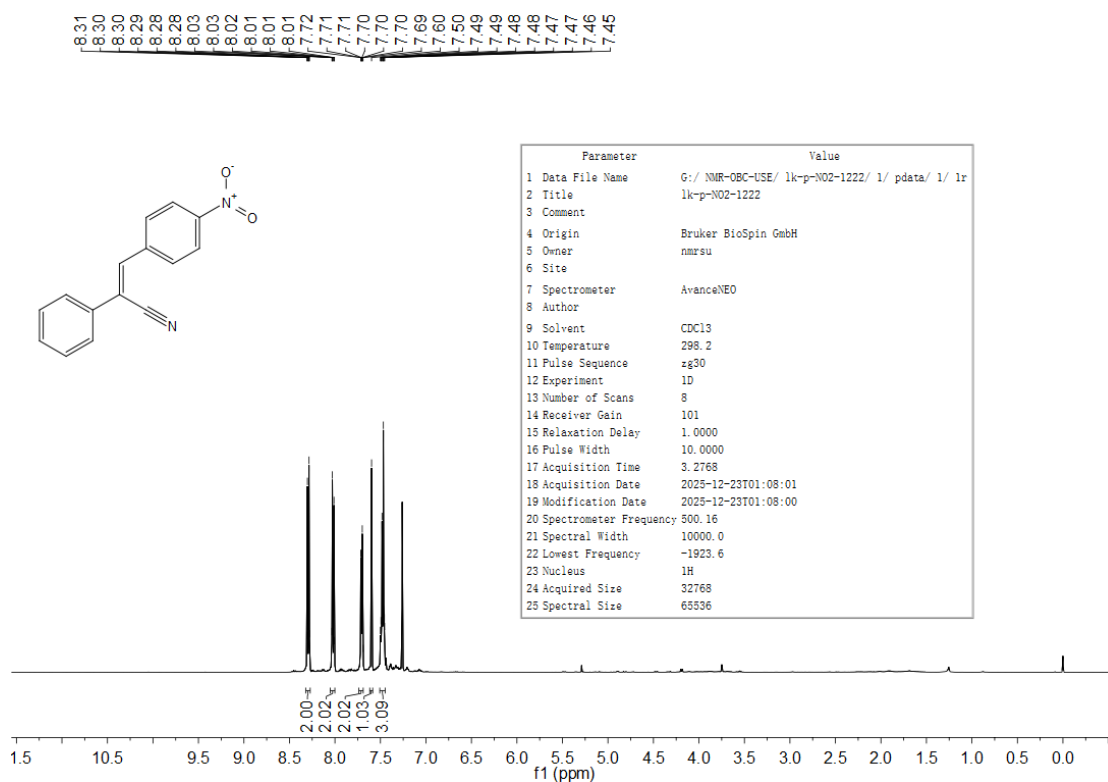

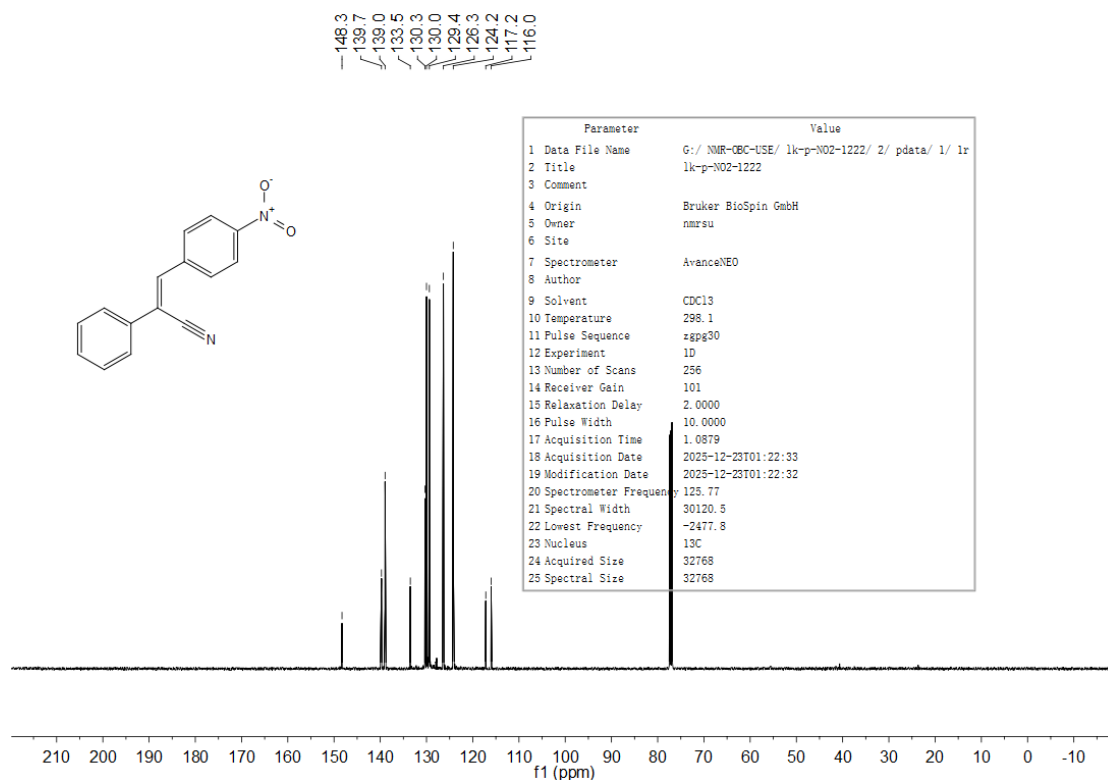

(Z)-2-phenyl-3-(pyridin-4-yl)acrylonitrile (3aq)

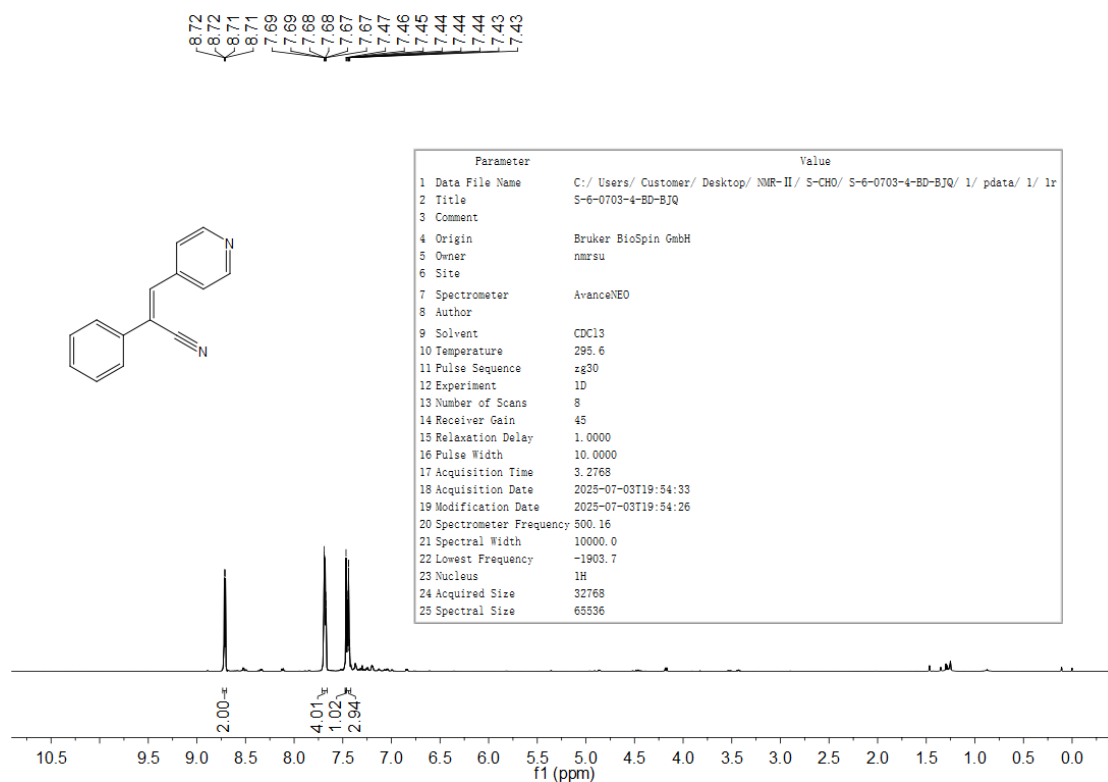

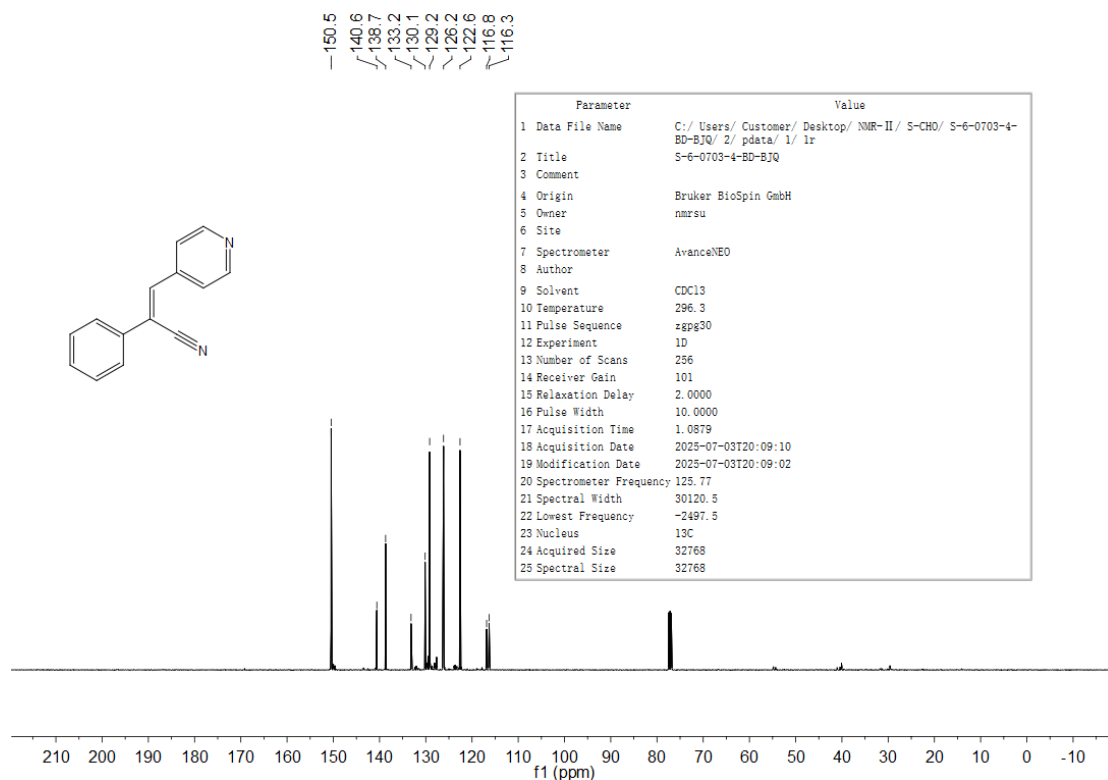

(Z)-2-phenyl-3-(pyridin-2-yl)acrylonitrile (3ar)

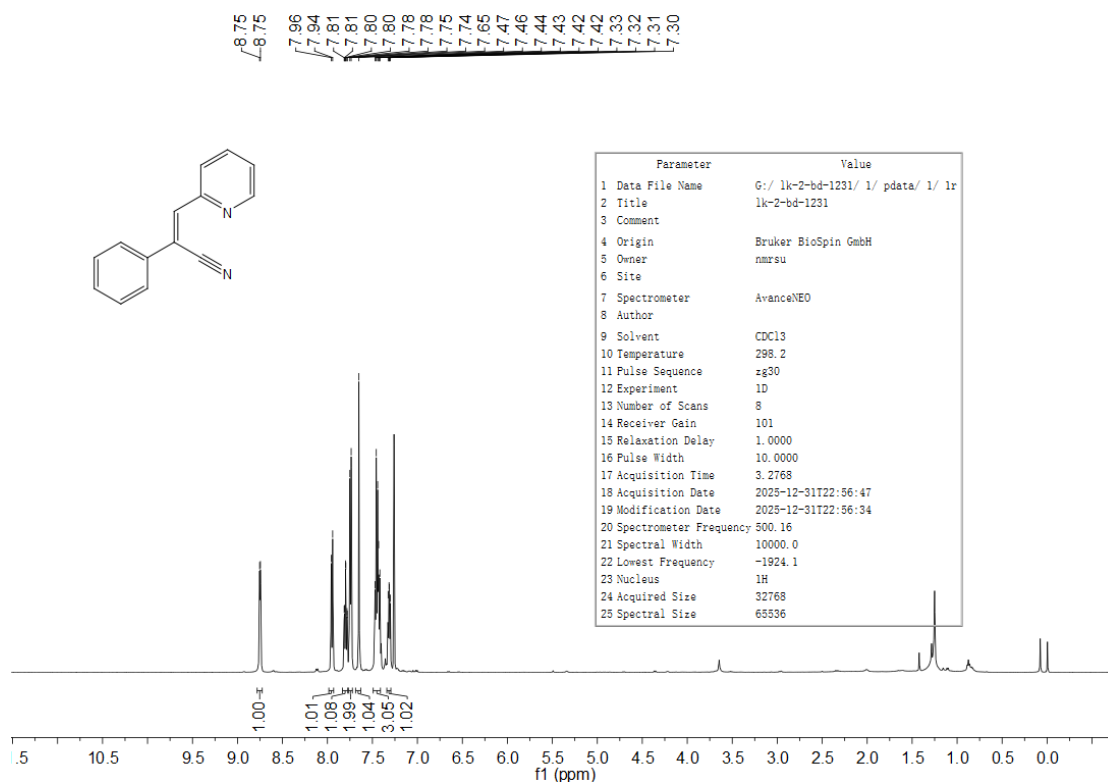

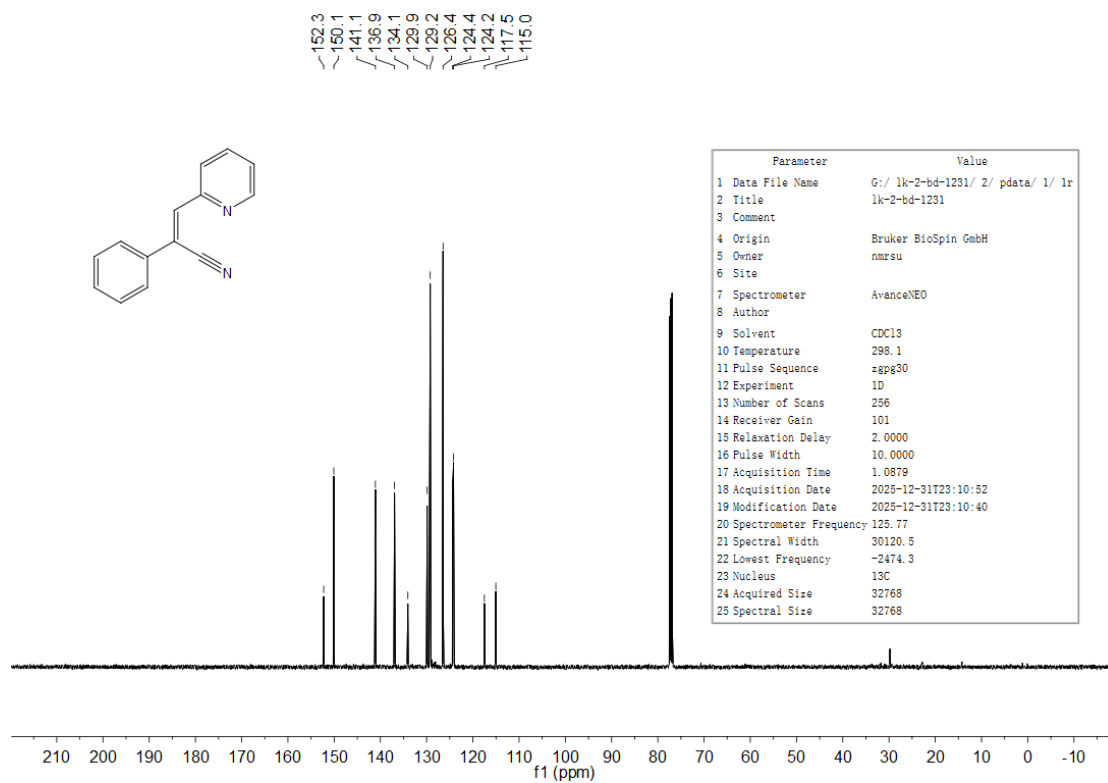

(2Z,4E)-2,5-diphenylpenta-2,4-dienitrile (3as)

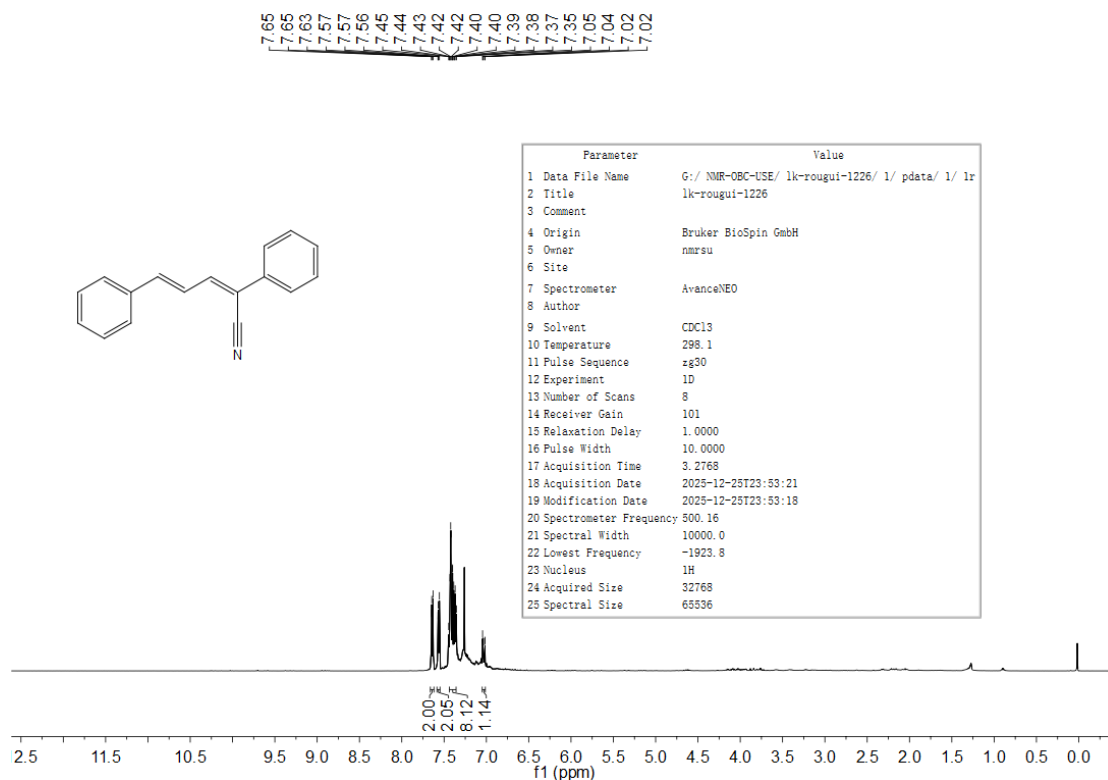

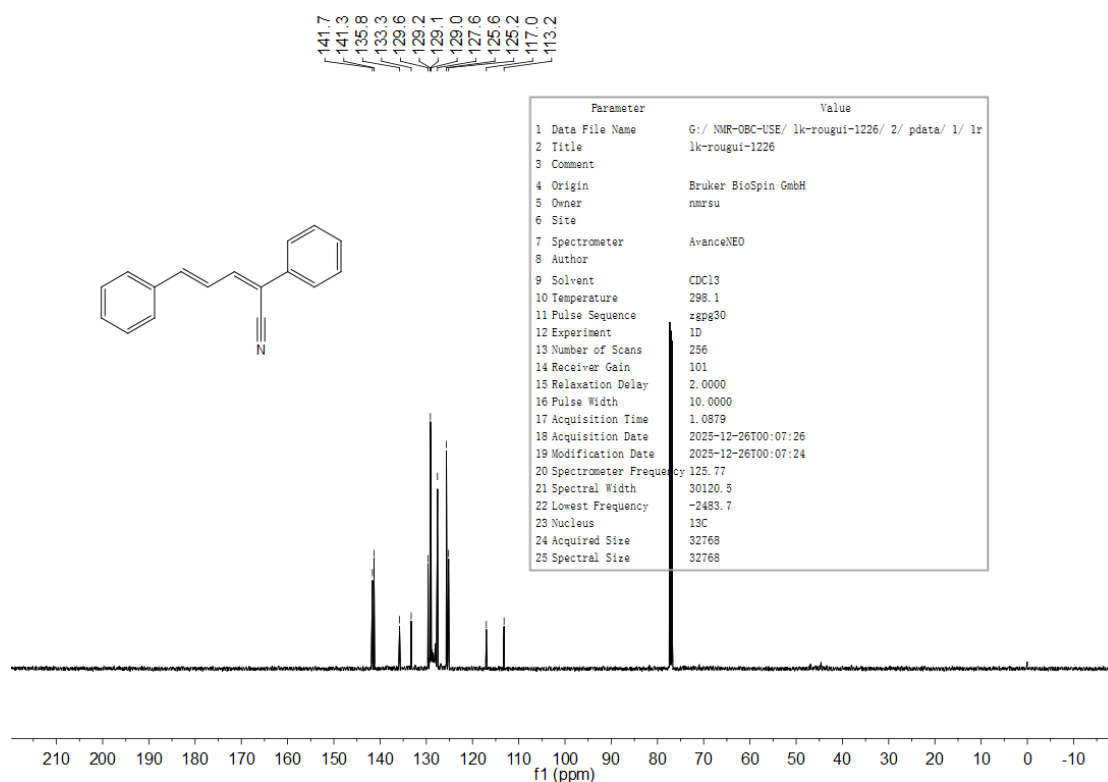

(Z)-3-cyclohexyl-2-phenylacrylonitrile (3at)

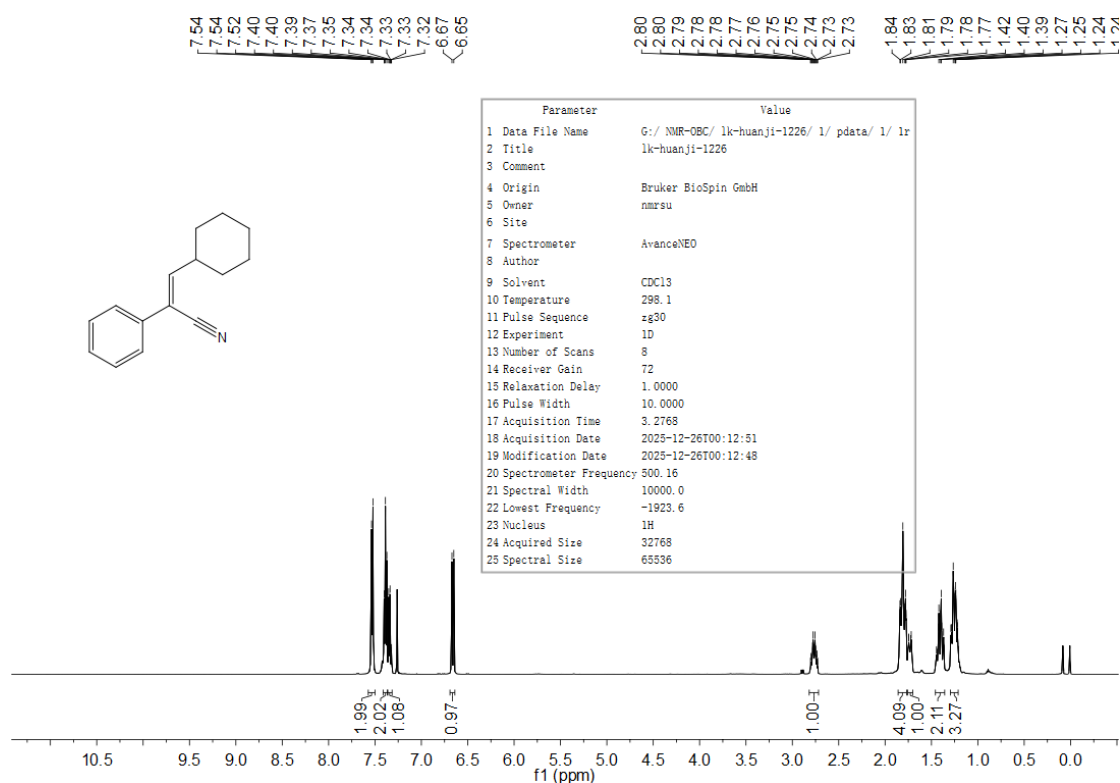

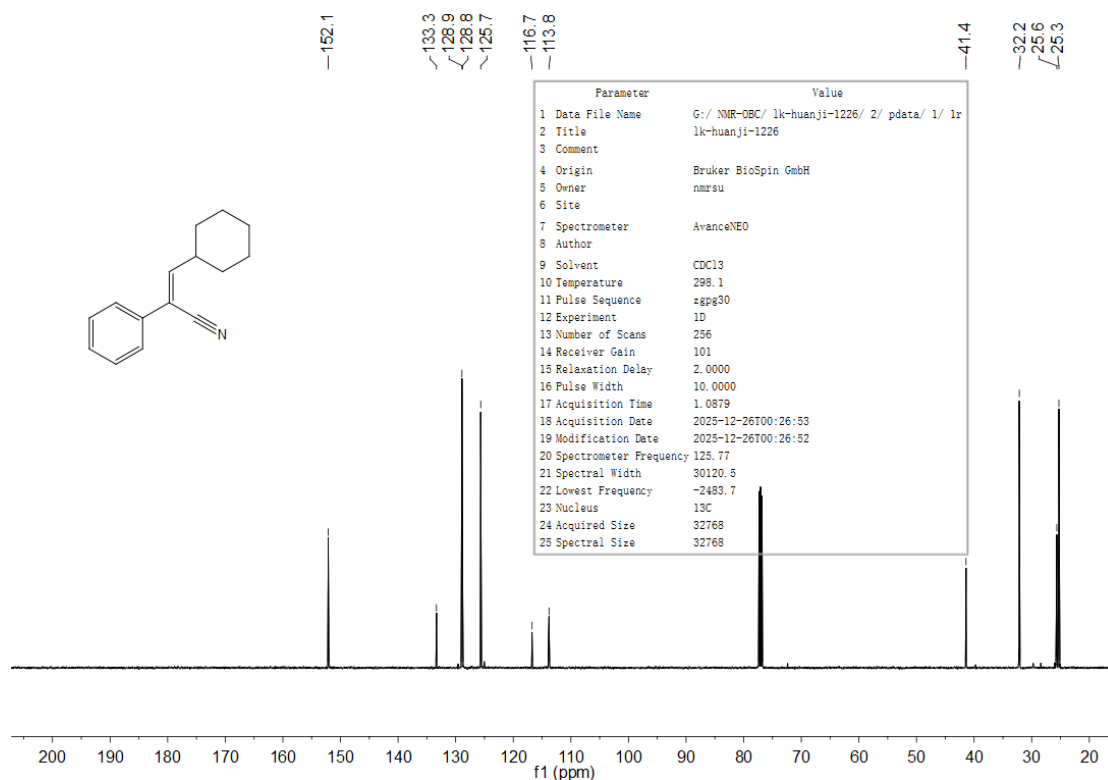

**(Z)-2-phenyl-3-(thiophen-3-yl)acrylonitrile (3aw)**

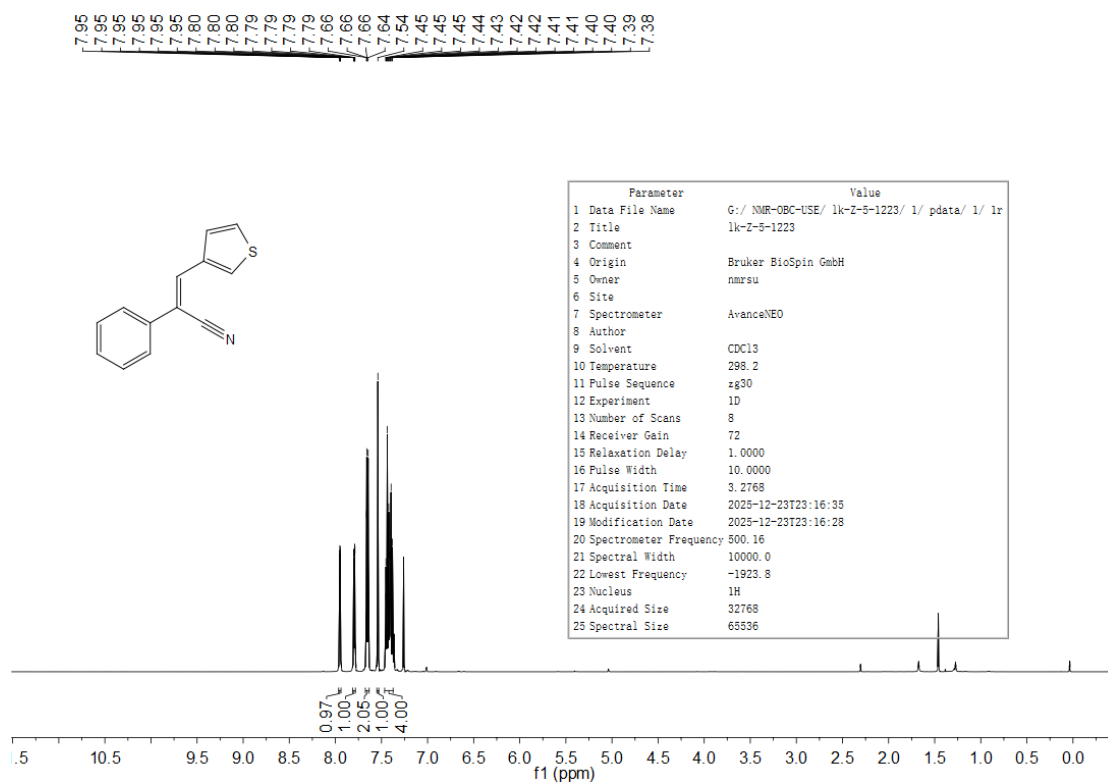

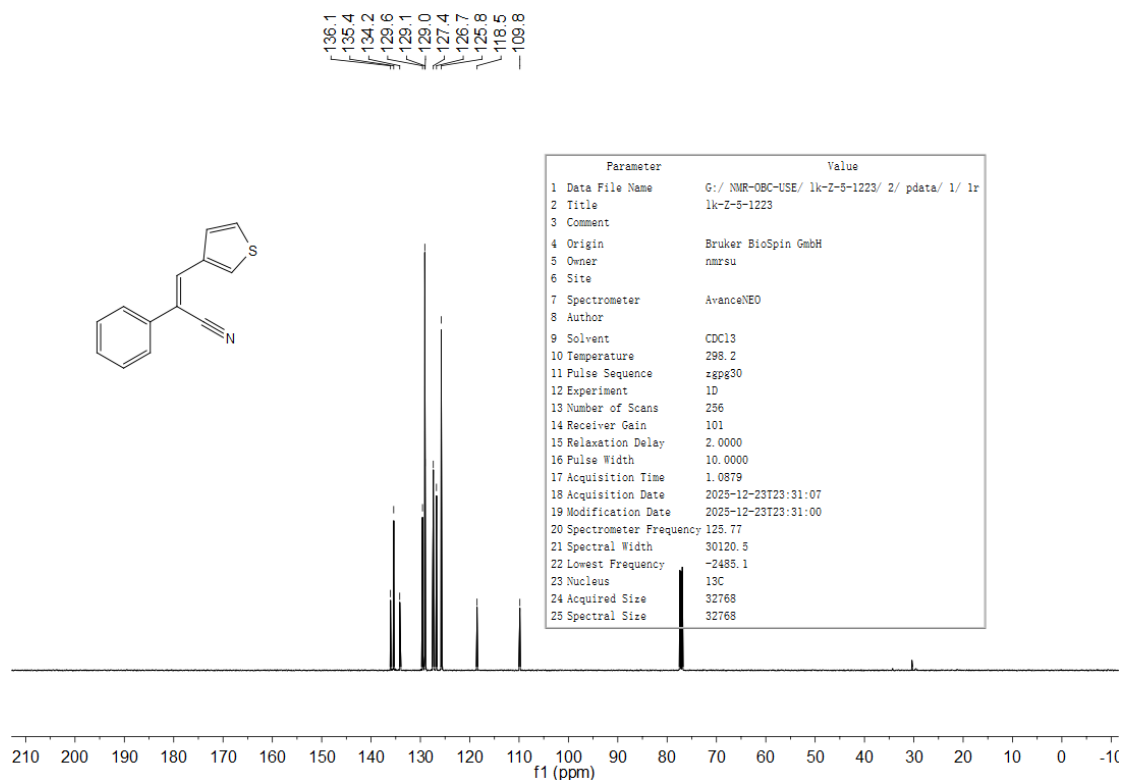

(Z)-2-phenylhept-2-enenitrile (3ax)

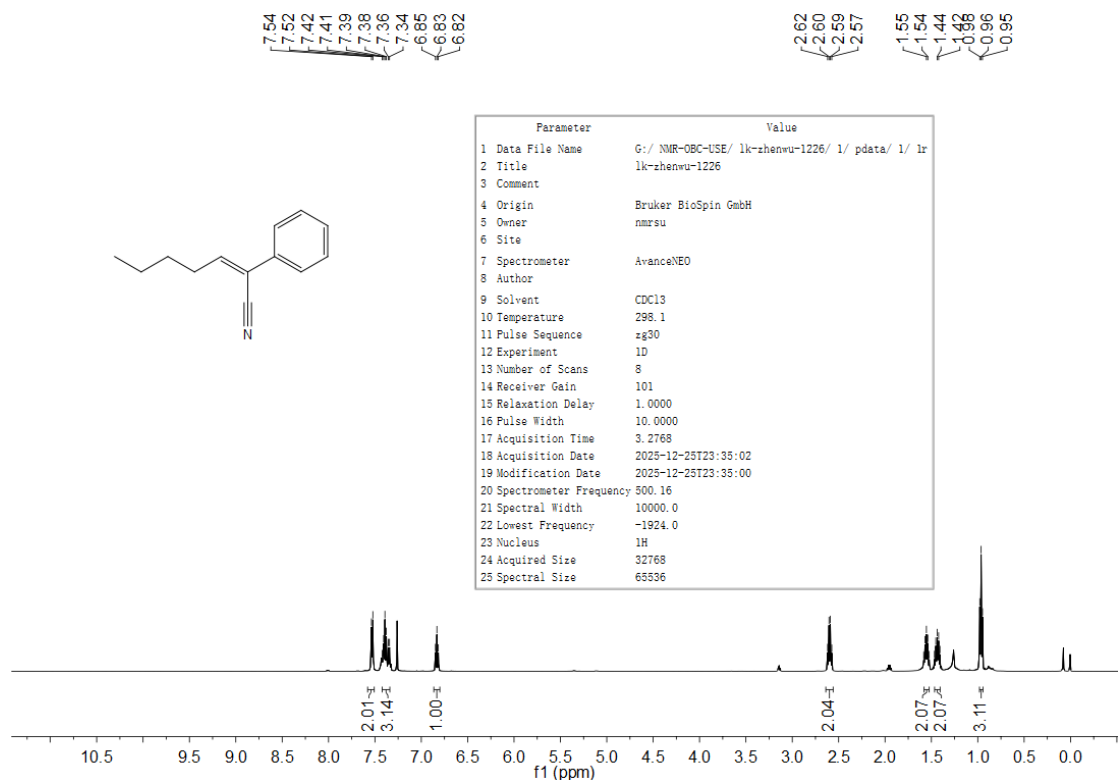



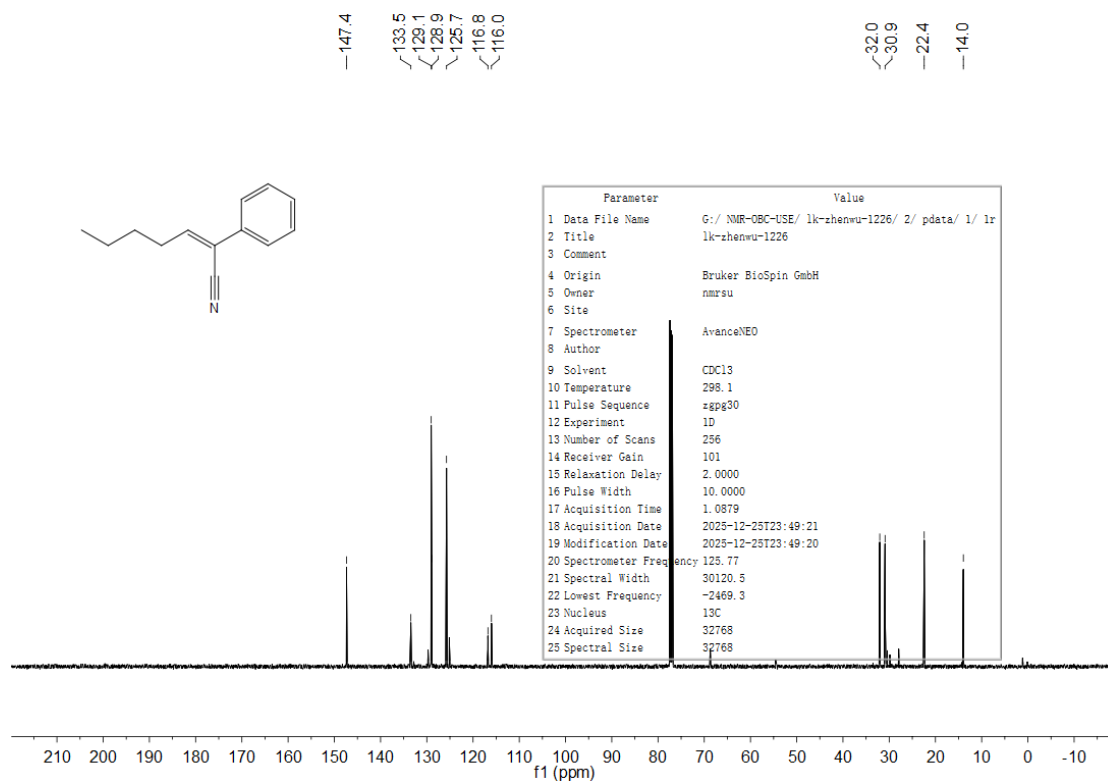

**3-hydroxy-3-(pyridin-2-yl)-2-(*p*-tolyl)propanenitrile (2:3 dr)(5)**

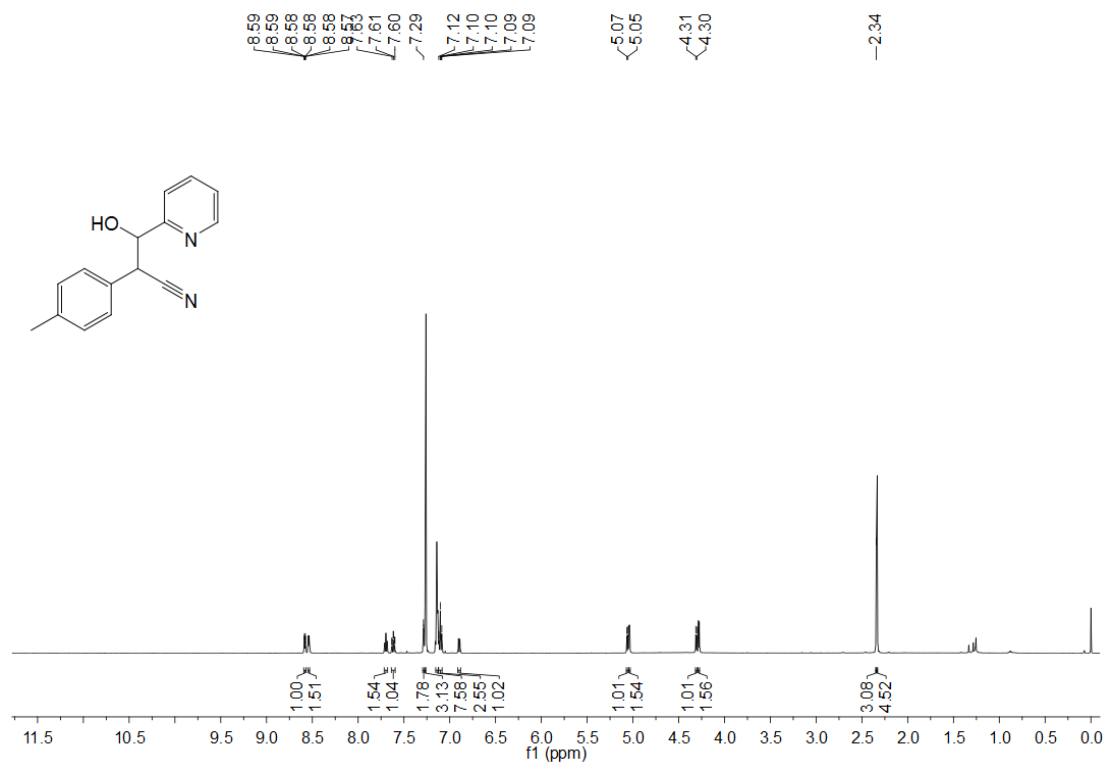

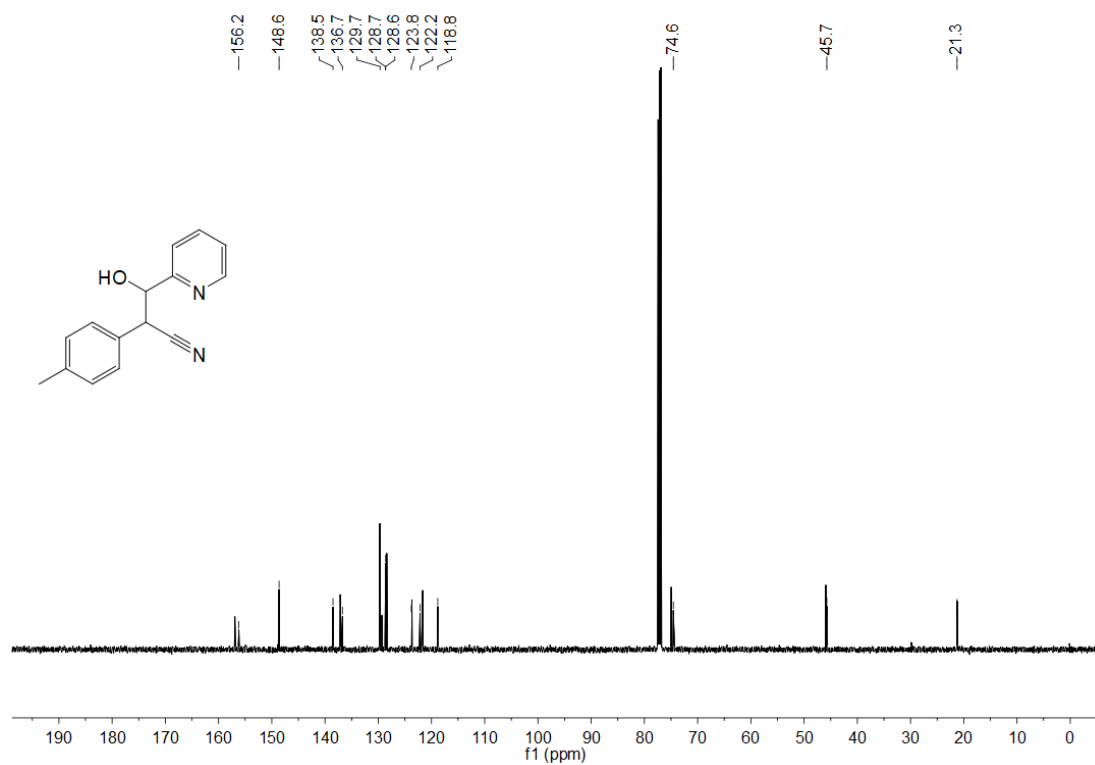

(Z)-3-(pyridin-2-yl)-2-(p-tolyl)acrylonitrile (6)

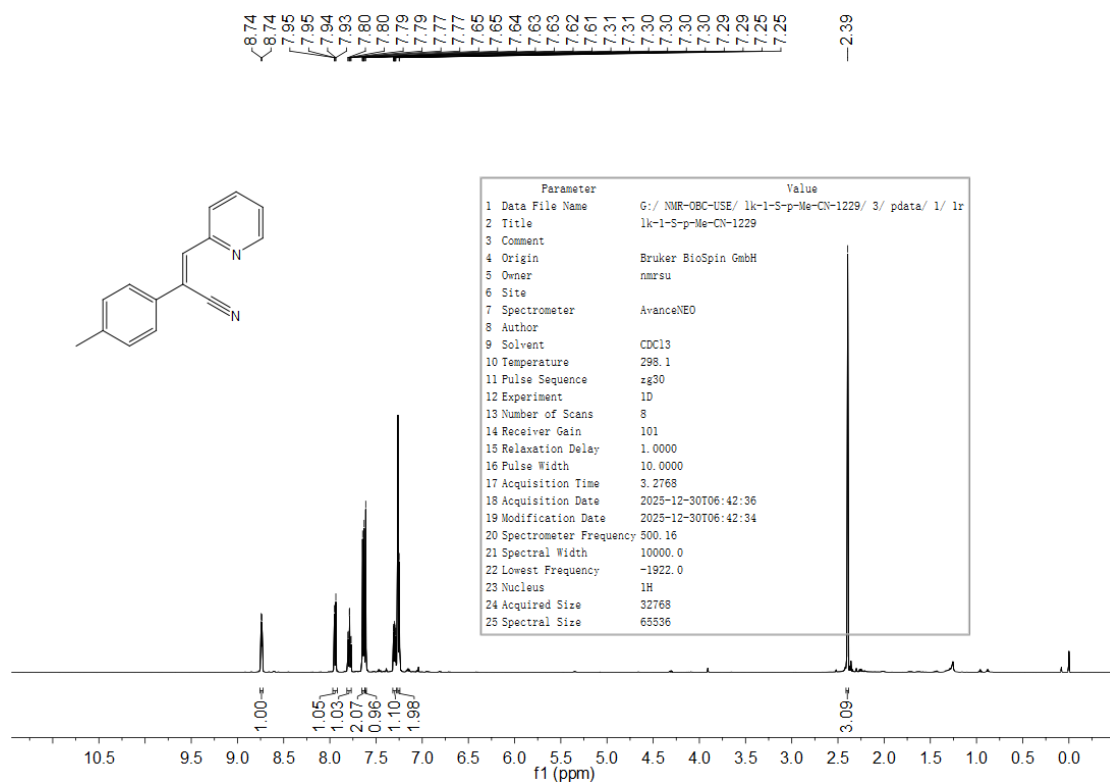

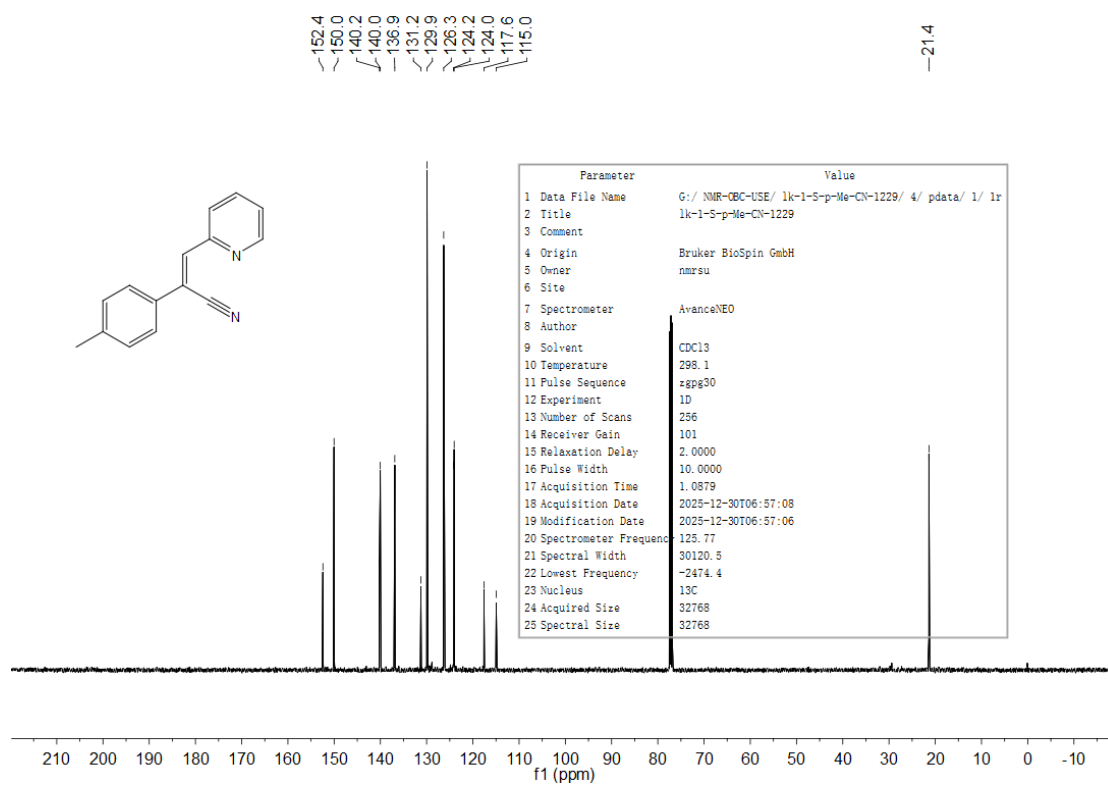

Supplement: d5ob01801c1.pdf [file d5ob01801c1.pdf]
